# Supplementary material for: Age at Natural Menopause and Blood Pressure Traits: Mendelian Randomization Study
Source: MDPI journal article supplement (doi:10.3390/jcm10194299), 2021-09-22
Supplement: s1 [file s1]

# Supplementary Materials

## List Online tables

|                                                                                                                                                                                                                |    |
|----------------------------------------------------------------------------------------------------------------------------------------------------------------------------------------------------------------|----|
| Table S1. Age of menopause SNPs and alleles used for the genetic risk score .....                                                                                                                              | 6  |
| Table S2. Observational association between age of natural menopause and blood pressure traits Log transformed .....                                                                                           | 8  |
| Table S3. Characteristics of participants without imputation and missing values by study .....                                                                                                                 | 9  |
| Table S4. Allele harmonization from GWAS of age of natural menopause and UK BIOBANK. ....                                                                                                                      | 11 |
| Table S5. Observational association between age of natural menopause and blood pressure traits.....                                                                                                            | 15 |
| Table S6. P values for interaction between age of natural menopause and Body Mass Index .....                                                                                                                  | 19 |
| Table S7. Comparison of estimates Rotterdam study imputed vs without imputation .....                                                                                                                          | 20 |
| Table S8. Sensitivity analysis observational estimates of the association between categories of anm and bp traits .....                                                                                        | 21 |
| Table S9. Association Genetic Risk Score of age of natural menopause (ANM) AND OBSERVED ANM.....                                                                                                               | 22 |
| Table S10. Association of weighted Genetic Risk Score with blood pressure traits by study.....                                                                                                                 | 23 |
| Table S11. Association of the Genetic Risk Score with confounders by study.....                                                                                                                                | 25 |
| Table S12. Association of each SNP included in the Genetic Risk Score with confounders by study .....                                                                                                          | 26 |
| Table S13. Association of each SNP included in the Genetic Risk Score with blood pressure traits by study. ....                                                                                                | 30 |
| Table S14. Causal Estimates Derived from Instrumental Variable Analysis Genetic Risk Score with SNPs related and non-related to DNA damage-response (DDR) genes. ....                                          | 32 |
| Table S15. Outlier SNPs identified in the MR-PRESSO .....                                                                                                                                                      | 33 |
| Table S16. Causal estimates of ANM in Systolic and diastolic blood pressure from SNPs related and non-related to DDR genes using methods implemented in MR-Base with data from GWAS of ANM and UK Biobank..... | 33 |
| Table S17. Identification of pleiotropic SNPs .....                                                                                                                                                            | 34 |
| Table S18. Two-sample Mendelian Randomization excluding SNPs associated with BMI and menarche ....                                                                                                             | 35 |
| Table S19. Two-sample Mendelian Randomization including all SNPs .....                                                                                                                                         | 36 |

## List Online Figures

|                                                                                                                                                                                                                |    |
|----------------------------------------------------------------------------------------------------------------------------------------------------------------------------------------------------------------|----|
| Figure S1. Flow chart of Study sample .....                                                                                                                                                                    | 37 |
| Figure S2. non-linear spline models .....                                                                                                                                                                      | 38 |
| Figure S3. Sensitivity analysis observational association ANM and Blood pressure traits .....                                                                                                                  | 39 |
| Figure S4. Association of Genetic Risk Score of ANM after the "leave-one-out" analyses.....                                                                                                                    | 43 |
| Figure S5. Causal Estimates Derived from Instrumental Variable Analysis for a year Increase in ANM and<br>Risk of blood pressure traits using Individual Participant Data and excluding the SNP rs1054875..... | 48 |
| Figure S6. Funnel plot of causal association between ANM and BP. ....                                                                                                                                          | 50 |
| Figure S7. Mendelian randomization diagnostic plots.....                                                                                                                                                       | 51 |
| Figure S8. Leave-one-out plot to assess if a single variant is driving the association between ANM and BP52                                                                                                    |    |
| Figure S9. Scatter plots, leave-one-out, funnel plots SNPs related to DDR genes.....                                                                                                                           | 54 |
| Figure S10. Scatter plots, leave-one-out, funnel plots SNPs non-related to DDR genes.....                                                                                                                      | 57 |

### *Study population*

CoLaus is a population-based study in Caucasians 35-75 years old living in the city of Lausanne, Switzerland. At baseline (2003-2006), 6,189 participants were included. The design of the study has been described elsewhere(1). In this study, postmenopausal women from the baseline were included. The Institutional Ethics Committee of the University of Lausanne - Switzerland, approved CoLaus; written informed consent was obtained from all participants.

The Rotterdam Study (RS) is a population-based cohort study of individuals 45 years and over living in the Ommoord district of Rotterdam, the Netherlands. The rationale and design of RS is described elsewhere(2). In brief, at baseline (1990-1993), 7,983 participants aged 55 years and over were included (RS-I). In 2000, an additional 3011 participants 55+ years were enrolled (RS-II). A second extension of the cohort was initiated in 2006, in which 3,932 participants aged 45 years or older were included (RS-III). The present study includes data from postmenopausal women from the third visit of the first cohort of RS (RS-I-3), the first visits of the second (RS-II-1) and first visit of the third cohort (RS-III-1). The RS has been approved by the medical ethics committee according to the Population Study Act Rotterdam Study, executed by the Ministry of Health, Welfare and Sports of the Netherlands. A written informed consent was obtained from all participants.

### *Assessment of BP traits*

In CoLaus, BP was measured thrice on the left arm with an appropriately sized cuff, after at least 10-minutes rest in the seated position using an Omron® HEM-907 automated oscillometric sphygmomanometer. In RS, BP was measured twice on the right arm (cuff size of 32×17), after a resting period of 5-minutes rest in the seated position using a random-zero sphygmomanometer. In the UK Biobank BP was measured twice in a seated position after 2-minutes of rest using an Omron HEM-7015IT digital BP monitor and an appropriate cuff (3). SBP was recorded at the appearance of sounds (first-phase Korotkoff) and DBP at the disappearance of sounds (fifth-phase Korotkoff).

In all cohorts, SBP and DBP were calculated as the average of two measurements, in CoLaus only the last two measurement were used. Also in CoLaus and RS, hypertension was defined as a SBP  $\geq 140$  mmHg, and/or DBP  $\geq 90$  mmHg, and/or the use of antihypertensive medication. Medication use information was based on the home interview in RS and self-filled questionnaires in CoLaus. Antihypertensive medication use was defined as diuretics,  $\beta$ -blockers, angiotensin-converting enzyme inhibitors, and calcium channel blockers. In the RS, a physician also ascertained the indication for which the medication had been prescribed.

### *Assessment of covariates*

Sociodemographic data, socio-economic, and lifestyle factors were recorded during the interview in both CoLaus and RS, and data from both studies were harmonized. Education was defined as low (primary education), intermediate (secondary general or vocational education), or high (higher vocational education or university). Alcohol intake was assessed in grams of ethanol per day, and participants were classified as drinkers vs. non-drinkers. Similarly, smoking status was dichotomized into current/ever smokers vs. never smokers. History of cardiovascular disease was defined as a history of coronary heart disease (myocardial infarction, revascularization, coronary artery bypass graft surgery or percutaneous coronary intervention) and was verified from the medical records of the general practitioner. Diabetes mellitus was defined as the use of blood glucose-lowering medications or fasting glucose  $\geq 7.0$  mmol/L. Estimated glomerular filtration rate (eGFR) was calculated using the simplified Modification of Diet in Renal Disease equation. Physical height (m) and body weight (kg) were measured at baseline with the participants standing without

shoes and heavy outer garments. Body mass index (BMI) was calculated as weight divided by height squared ( $\text{kg}/\text{m}^2$ ). All biochemical parameters were assessed in fasting serum.

### *Genotyping*

In CoLaus, nuclear DNA was extracted from whole blood for whole genome scan analysis and genotyping was performed using the Affimetrix 500 K SNP chip, as recommended by the manufacturer. Subjects were excluded from the analysis in case of inconsistency between sex and genetic data, a genotype call rate  $<90\%$ , or inconsistencies of genotyping results in duplicate samples. Quality control for SNPs was performed using the following criteria: monomorphic (or with minor allele frequency (MAF)  $<1\%$ ), call rates  $<90\%$ , deviation from the Hardy-Weinberg equilibrium ( $p < 1 \times 10^{-6}$ ). Phased haplotypes were generated using SHAPEIT2(4). Imputation was performed using minimac3(5) and the Haplotype Reference Consortium (HRC version r1.1)(6) hosted on the Michigan Imputation Server(5).

In the RS, genotyping was conducted, in self-reported white participants, using the Illumina 550K array. Participants were excluded if they had excess autosomal heterozygosity, a mismatch between the reported and phenotypic sex, or recognized as being an outlier with identical-by-state clustering analysis. Moreover, SNPs with allele frequency  $\leq 1\%$ , Hardy-Weinberg equilibrium  $p < 10^{-5}$ , or SNP call rate  $\leq 90\%$  were excluded. Imputation was done with reference to HapMap release 22 CEU (Utah residents of northern and western European ancestry) using the maximum likelihood method implemented in Markov Chain based haplotyper (version 1.0.15).

### *Genetic risk score*

For each SNP included in the genetic risk score of the ANM (GRS-ANM), the number of corresponding coded alleles was multiplied by the absolute value of the beta-coefficient for ANM reported in the reference GWAS(7), and then these products were summed up. Successively, to produce an average measure, the GRS-ANM was divided by the number of effectively genotyped SNPs, then the product was multiplied by 100 to rescale the scores to a range between 0 and 100(8).

### *Statistical Analyses*

#### *Cross-sectional analyses*

In the model 4 we calculated the variance inflation factor (VIF) to evaluate multicollinearity among the covariates included; none of them presented a value greater than 10 (9). We conducted the diagnostics of the final linear and logistic regression models by evaluating the residuals and we identified three observations with large leverage in the CoLaus data; these observations were excluded from the final model investigating the association between ANM and DBP. Interaction of ANM and BMI were evaluated in model 4 by including a cross-product interaction term. Furthermore, we fitted non-linear (spline) models, using the “mkspline” package with restricted cubic spline construction (4 knots) in Stata, to explore nonlinear relationship between ANM and SBP, DBP and hypertension. In CoLaus, ANM, eGFR and BMI were nonlinear in the logit scale, which is the link function where the probabilities of the levels of hypertension status are transform to a continuous scale to be modeled as a linear association between the exposures and the outcome. Therefore, fractional polynomial were explored; nevertheless, none of them improved the model. ANM, SBP and DBP did not follow a normal distribution; thus, a log transformation was tested (Table S2). However, results did not change and residuals followed the assumptions; as a result, the analysis were reported with the untransformed variables. To adjust for potential biases associated with missing data from the covariates, we used multiple imputation procedure ( $n=10$  imputations) in the RS's datasets; most of the variables had less than 7% of missing values, nevertheless alcohol consumption had up to 64% of missing values. Only two participants with missing data on BMI and

educational level were present in CoLaus study; thus, no multiple imputation was applied for analyses in CoLaus (Table S3).

#### *One sample Mendelian randomization*

##### *Association of the GRS-ANM and BP/ hypertension*

The first model adjusted for age and eGFR. In the second model, we additionally adjusted for antihypertensive medication, BMI, drinking status, diabetes, history of cardiovascular diseases, total cholesterol, smoking status, statin use, hormone therapy and education level; when hypertension was the outcome, we did not adjust for antihypertensive medications.

Mendelian randomization relies on three assumptions, first, the GRS-ANM is associated with the ANM, second, there are no unmeasured confounders of the association between GRS-ANM and BP traits, and third, the GRS-ANM affect the outcome only through their effect on the ANM(10). In order to explore the first assumption, we calculated the partial “F” statistics and partial “R<sup>2</sup>” for the association between GRS-ANM and ANM. Regarding the second and third assumption, we evaluated the association of each SNP with BP traits, and confounders. The cut-off for significance was established using the Bonferroni correction. To further investigate if a single SNP was influencing the associations, we performed a leave-one-out analysis by creating GRSs that excluded one SNP at a time(11).

#### *Two sample Mendelian Randomization*

IVM assumes that all variants are valid instruments, and any pleiotropy is balanced. The MR-Egger was implemented under the Instrument Strength Independent of Direct Effect (InSIDE) assumption, the intercept of a weighted regression will be other than zero in the existence of directional pleiotropy, and the slope of that regression will be a consistent estimate of the causal effect of X on Y. The weighted median method is robust to outliers (up to 50% of invalid instrumental variables), while MR-PRESSO addresses the between variants heterogeneity and horizontal pleiotropy(11).

#### *Author contributions*

TM conceived the study. ZMRD, EA, PMV, TV and TM designed the study. TM supervised the study. ZMRV, EA, HA, LZR, JN, MAI, FD, OHF, RP, PDM, TV and TM participated in data acquisition, collection, analysis or interpretation. ZMRD, EA, HA, FD and RP performed the statistical analyses. ZMRD, EA, PMV, TV and TM drafted the manuscript; HA, LZR, JN, MAI, FD, OHF, and RP critically revised the manuscript for intellectual content. All authors approved the final version of the manuscript. ZMRD and TM are the guarantors of the study and responsible for the integrity of the work as a whole.

TABLE S1. AGE OF MENOPAUSE SNPs AND ALLELES USED FOR THE GENETIC RISK SCORE

| n  | Region | Signal SNP | Chr | Position    | Alleles  |
|----|--------|------------|-----|-------------|----------|
| 1  | 1      | rs4246511  | 1   | 39,152,972  | c/t/0.71 |
| 2  | 2      | rs12142240 | 1   | 46,519,888  | t/c/0.68 |
| 3  | 3      | rs1411478  | 1   | 179,228,905 | a/g/0.41 |
| 4  | 4      | rs2236918  | 1   | 240,084,449 | c/g/0.45 |
| 5  | 5      | rs704795   | 2   | 27,569,998  | a/g/0.4  |
| 6  | 6      | rs1800932  | 2   | 47,871,585  | a/g/0.81 |
| 7  | 7      | rs930036   | 2   | 171,649,264 | a/g/0.38 |
| 8  | 8      | rs16858210 | 3   | 185,106,704 | g/a/0.75 |
| 9  | 9      | rs4693089  | 4   | 84,592,646  | a/g/0.51 |
| 10 | 10     | rs6856693  | 4   | 185,985,800 | a/g/0.58 |
| 11 | 11     | rs427394   | 5   | 6,798,875   | g/a/0.41 |
| 12 | 12     | rs11738223 | 5   | 171,867,097 | a/g/0.68 |
| 13 | 13a    | rs2241584  | 5   | 175,888,783 | a/g/0.38 |
| 14 | 13b    | rs365132   | 5   | 176,311,180 | g/t/0.51 |
| 15 | 14a    | rs6899676  | 6   | 11,003,246  | a/g/0.8  |
| 16 | 14b    | rs9393800  | 6   | 11,059,723  | g/a/0.27 |
| 17 | 15a    | rs2230365  | 6   | 31,633,427  | c/t/0.84 |
| 18 | 15b    | rs707938   | 6   | 31,837,338  | g/a/0.32 |
| 19 | 16     | rs12196873 | 6   | 111,704,751 | a/c/0.85 |
| 20 | 17     | rs2720044  | 8   | 38,099,744  | a/c/0.84 |
| 21 | 18     | rs10957156 | 8   | 61,791,955  | a/g/0.76 |
| 22 | 19     | rs4879656  | 9   | 33,002,382  | a/c/0.37 |
| 23 | 20     | rs10905065 | 10  | 5,809,833   | a/g/0.61 |
| 24 | 21a    | rs11031006 | 11  | 30,183,104  | g/a/0.85 |
| 25 | 21b    | rs6484478  | 11  | 30,263,016  | g/a/0.74 |
| 26 | 22     | rs10734411 | 11  | 32,498,360  | a/g/0.47 |
| 27 | 23     | rs2277339  | 12  | 55,432,336  | g/t/0.1  |
| 28 | 24a    | rs3741604  | 12  | 64,982,677  | t/c/0.52 |
| 29 | 24b    | rs1183272  | 12  | 65,021,688  | c/t/0.45 |
| 30 | 24c    | rs7397861  | 12  | 65,100,733  | g/c/0.64 |
| 31 | 25     | rs551087   | 12  | 119,693,576 | g/a/0.29 |
| 32 | 26     | rs1727326  | 12  | 122,166,039 | c/g/0.15 |
| 33 | 27     | rs12824058 | 12  | 129,370,287 | g/a/0.43 |
| 34 | 28     | rs4886238  | 13  | 60,011,740  | g/a/0.66 |
| 35 | 29     | rs1713460  | 14  | 20,003,455  | g/a/0.3  |
| 36 | 30     | rs9796     | 15  | 39,058,739  | t/a/0.46 |
| 37 | 31     | rs1054875  | 15  | 87,680,130  | t/a/0.4  |
| 38 | 32     | rs9039     | 16  | 9,112,864   | c/t/0.28 |
| 39 | 33     | rs10852344 | 16  | 11,924,420  | t/c/0.59 |
| 40 | 34     | rs12599106 | 16  | 34,355,526  | a/t/0.51 |
| 41 | 35     | rs8070740  | 17  | 5,272,620   | a/g/0.76 |
| 42 | 36     | rs2941505  | 17  | 35,086,230  | a/g/0.32 |
| 43 | 37     | rs1799949  | 17  | 38,498,992  | g/a/0.68 |
| 44 | 38     | rs349306   | 19  | 901,694     | g/a/0.13 |
| 45 | 39     | rs7259376  | 19  | 22,299,545  | a/g/0.46 |

| n  | Region | Signal SNP | Chr | Position   | Alleles  |
|----|--------|------------|-----|------------|----------|
| 46 | 40a    | rs11668344 | 19  | 60,525,476 | g/a/0.36 |
| 47 | 40b    | rs2547274  | 19  | 61,002,040 | g/c/0.91 |
| 48 | 40c    | rs12461110 | 19  | 61,012,475 | a/g/0.35 |
| 49 | 41a    | rs451417   | 20  | 5,889,999  | a/c/0.12 |
| 50 | 41b    | rs16991615 | 20  | 5,896,227  | g/a/0.93 |
| 51 | 42a    | rs2236553  | 20  | 60,760,188 | c/t/0.24 |
| 52 | 42b    | rs13040088 | 20  | 61,019,647 | g/a/0.21 |
| 53 | 43     | rs5762534  | 22  | 26,963,571 | t/c/0.84 |
| 54 | 44     | rs763121   | 22  | 37,209,886 | g/a/0.36 |

Chr = Chromosome

TABLE S2. OBSERVATIONAL ASSOCIATION BETWEEN AGE OF NATURAL MENOPAUSE AND BLOOD PRESSURE TRAITS LOG TRANSFORMED

| ANM      | SBP               |       | DBP               |       | Hypertension     |       |
|----------|-------------------|-------|-------------------|-------|------------------|-------|
|          | $\beta$ (95% CI)  | p     | $\beta$ (95% CI)  | p     | OR(95% CI)       | p     |
| CoLaus   | 0.01(-0.08;0.10)  | 0.861 | 0.09(0.00;0.18)   | 0.043 | 2.17(0.46;10.27) | 0.327 |
| RS-I-3   | 0.05(-0.04;0.14)  | 0.27  | -0.04(-0.12;0.05) | 0.438 | 2.83(0.67;11.87) | 0.155 |
| RS-II-1  | -0.01(-0.12;0.11) | 0.925 | -0.03(-0.15;0.09) | 0.607 | 3.89(0.49;30.64) | 0.197 |
| RS-III-1 | 0.16(0.04;0.29)   | 0.008 | 0.10(-0.01;0.22)  | 0.074 | 3.75(0.56;25.15) | 0.174 |

SBP = Systolic blood pressure; DBP = Diastolic blood pressure; OR = Odds ratio; CI=Confidence interval; p = p value

Models adjusted for age and glomerular filtration rate, body mass index, total cholesterol, drinking status, education level, smoking status, prevalent Type 2 diabetes, history of cardiovascular diseases, statin use, hormone replacement therapy, antihypertensive medication

TABLE S3. CHARACTERISTICS OF PARTICIPANTS WITHOUT IMPUTATION AND MISSING VALUES BY STUDY

| Study                                   | CoLaus<br>(n=1139) |             |            | RS-I-3<br>(n=1603) |             |            | RS-II-1<br>(n=790) |             |            | RS-III-1<br>(n=919) |             |            |
|-----------------------------------------|--------------------|-------------|------------|--------------------|-------------|------------|--------------------|-------------|------------|---------------------|-------------|------------|
| Variable                                | I<br>n(%)          | NI<br>n (%) | MV<br>n(%) | I<br>n(%)          | NI<br>n (%) | MV<br>n(%) | I<br>n(%)          | NI<br>n (%) | MV<br>n(%) | I<br>n(%)           | NI<br>n (%) | MV<br>n(%) |
| Age, years mean (SD) y                  | 61.2 (7.0)         | 61.2(7.0)   | 0          | 73.2 (7.5)         | 73.2(7.5)   | 0          | 65.4 (8.4)         | 65.4(8.4)   | 0          | 59.7 (6.5)          | 59.7(6.5)   | 0          |
| BMI, Kg/m2 ,mean (SD)                   | 25.6 (4.9)         | 25.6(4.9)   | 1(0.1)     | 27.2 (4.4)         | 27.2(4.4)   | 45(2.8)    | 27.3 (4.3)         | 27.3(4.3)   | 3(0.4)     | 27.4 (4.8)          | 27.4(4.8)   | 4(0.4)     |
| Categories of ANM (%)                   |                    |             |            |                    |             |            |                    |             |            |                     |             |            |
| Early (40-44)                           | 111 (9.7)          | 111(9.7)    |            | 151 (9.4)          | 151 (9.4)   |            | 68 (8.7)           | 68(8.7)     |            | 63 (6.8)            | 63(6.8)     |            |
| Intermediate (45-49)                    | 308 (27.0)         | 308(27.0)   | 0          | 411 (35.1)         | 411 (35.1)  | 0          | 178 (22.5)         | 178(22.5)   | 0          | 213 (23.2)          | 213 (23.2)  | 0          |
| Normal (50-54)                          | 549 (48.2)         | 549(48.2)   |            | 876 (54.7)         | 876 (54.7)  |            | 407 (51.5)         | 407 (51.5)  |            | 512 (55.7)          | 512(55.7)   |            |
| Late (≥55)                              | 171 (15.0)         | 171(15.0)   |            | 165 (10.3)         | 165 (10.3)  |            | 137 (17.3)         | 137(17.3)   |            | 131 (14.2)          | 131(14.2)   |            |
| Smoking status                          |                    |             |            |                    |             |            |                    |             |            |                     |             |            |
| No                                      | 565(49.6)          | 565(49.6)   | 0          | 1364(85.1)         | 1331(84.8)  | 33(2.0)    | 643(81.4)          | 643(81.4)   | 0          | 702(76.4)           | 701(76.3)   | 1(0.1)     |
| Yes                                     | 574 (50.4)         | 574(50.4)   |            | 239 (14.9)         | 239(15.2)   |            | 147 (18.6)         | 147(18.6)   |            | 217 (23.6)          | 211(23.7)   |            |
| Alcohol drinker                         |                    |             |            |                    |             |            |                    |             |            |                     |             |            |
| No                                      | 401(35.2)          | 401(35.2)   | 0          | 402(25.1)          | 396(25.2)   | 31(1.9)    | 275(34.8)          | 157(55.8)   | 509(64)    | 37(4.0)             | 13(1.8)     | 194(21)    |
| Yes                                     | 738 (64.8)         | 738 (64.8)  |            | 1201 (74.9)        | 1176(74.8)  |            | 515 (65.2)         | 124(44.1)   |            | 882 (95.9)          | 712(98.2)   |            |
| Educational level (%)                   |                    |             |            |                    |             |            |                    |             |            |                     |             |            |
| High                                    | 123 (10.8)         | 123(10.8)   | 1(0.1)     | 79 (4.9)           | 76(4.8)     | 15(0.9)    | 77 (9.8)           | 77(9.8)     | 4(0.5)     | 171 (18.6)          | 171(18.7)   | 2(0.2)     |
| Middle                                  | 280 (24.6)         | 280(24.6)   |            | 399 (24.9)         | 396(24.9)   |            | 159 (20.1)         | 158(20.1)   |            | 170 (18.5)          | 170(18.5)   |            |
| Low                                     | 735 (64.7)         | 735(64.7)   |            | 1125 (70.2)        | 1116(70.3)  |            | 554 (70.1)         | 551(70.1)   |            | 578 (62.9)          | 576(62.7)   |            |
| Assessed physical traits,<br>mean (SD)  |                    |             |            |                    |             |            |                    |             |            |                     |             |            |
| Total cholesterol, nmol/L,<br>mean (SD) | 5.9 (0.99)         | 5.9(0.99)   | 0          | 6.0 (1.0)          | 6.0(1.0)    | 89(5.5)    | 6.0 (1.0)          | 6.0(1.0)    | 3(0.4)     | 5.8 (1.0)           | 5.8(1.0)    | 4(0.43)    |
| eGFR mL/min per 1.73 m2,<br>mean (SD)   | 78.0 (13.7)        | 78.0(13.7)  | 0          | 68.9 (14.5)        | 68.9(14.5)  | 114(7.1)   | 79.7 (15)          | 79.7(15)    | 25(3.2)    | 82.6 (13.2)         | 82.6(13.2)  | 47(5.1)    |
| Systolic BP, mm Hg, mean<br>(SD)        | 130.8<br>(18.7)    | 130.8(18.7) | 0          | 143.5<br>(21.3)    | 143.5(21.3) | 0          | 142.4<br>(21.5)    | 142.4(21.5) | 0          | 132.0<br>(20.0)     | 132.0(20.0) | 0          |
| Diastolic BP, mm Hg, mean<br>(SD)       | 78.7 (10.4)        | 78.7(10.4)  | 0          | 74.2 (10.9)        | 74.2(10.9)  | 0          | 77.2 (10.3)        | 77.2(10.3)  | 0          | 84.4 (11.2)         | 84.4(11.2)  | 0          |
| Hypertension                            | 492 (43.2)         | 492(43.2)   | 0          | 1110 (69.3)        | 1110(69.3)  | 0          | 492 (62.3)         | 492(62.3)   | 0          | 454 (49.5)          | 454(49.5)   | 0          |



|                                    |            |           |   |            |           |          |            |           |        |            |           |        |
|------------------------------------|------------|-----------|---|------------|-----------|----------|------------|-----------|--------|------------|-----------|--------|
| Diabetes                           | 55 (5.0)   | 55(5.0)   | 0 | 200 (12.5) | 192(12.6) | 74(4.6)  | 79 (10.0)  | 79(10.0)  | 0      | 62 (6.7)   | 62(6.7)   | 1(0.1) |
| History of cardiovascular diseases | 85 (7.5)   | 85(7.5)   | 0 | 176 (11.0) | 175(11.0) | 14(0.9)  | 40 (5.1)   | 40(5.1)   | 4(0.5) | 25 (2.74)  | 25(2.74)  | 7(0.8) |
| Receiving BP-related medication    | 262 (23.0) | 264(23.2) | 0 | 614 (38.3) | 614(38.3) | 0        | 226 (28.6) | 226(28.6) | 0      | 223 (24.2) | 223(24.2) | 0      |
| Hormone therapy                    | 638 (56.0) | 638(56.0) | 0 | 35 (2.3)   | 35(2.3)   | 102(6.3) | 31 (3.9)   | 31(3.9)   | 0      | 16 (1.7)   | 16(1.7)   | 5(0.5) |
| Statin therapy                     | 141 (12.4) | 141(12.4) | 0 | 206 (12.8) | 189(12.6) | 102(6.3) | 94 (11.9)  | 94(11.9)  | 0      | 201 (21.9) | 201(21.9) | 5(0.5) |

I = Imputed; NI= Not-imputed; MV = Missing values; BMI = Body mass index; eGFR = estimated glomerular filtration rate; n = number of participants; SD = standard deviation; y = years; BP = blood pressure

TABLE S4. ALLELE HARMONIZATION FROM GWAS OF AGE OF NATURAL MENOPAUSE AND UK BIOBANK.

| Pre-harmonisation     |    |    |       |      |                          |    |    |             |           | Post-harmonisation    |    |    |       |      |                          |    |    |          |         |
|-----------------------|----|----|-------|------|--------------------------|----|----|-------------|-----------|-----------------------|----|----|-------|------|--------------------------|----|----|----------|---------|
| Age natural menopause |    |    |       |      | Diastolic blood pressure |    |    |             |           | Age natural menopause |    |    |       |      | Diastolic blood pressure |    |    |          |         |
| SNP                   | A1 | A2 | Beta  | se   | SNP                      | A1 | A2 | Beta        | SE        | SNP                   | a1 | a2 | beta  | se   | SNP                      | A1 | A2 | Beta     | SE      |
| rs1054875             | T  | A  | -0.19 | 0.02 | rs1054875                | T  | A  | -0.0723682  | 0.0394608 | rs1054875             | T  | A  | -0.19 | 0.02 | rs1054875                | T  | A  | -0.07237 | 0.03946 |
| rs10734411            | A  | G  | -0.12 | 0.02 | rs10734411               | A  | G  | 0.0679943   | 0.0382846 | rs10734411            | A  | G  | -0.12 | 0.02 | rs10734411               | A  | G  | 0.06799  | 0.03828 |
| rs10852344            | T  | C  | -0.16 | 0.02 | rs10852344               | C  | T  | 0.148183    | 0.0390494 | rs10852344            | T  | C  | -0.16 | 0.02 | rs10852344               | T  | C  | -0.14818 | 0.03905 |
| rs10905065            | A  | G  | -0.11 | 0.02 | rs10905065               | G  | A  | 0.0221999   | 0.039216  | rs10905065            | A  | G  | -0.11 | 0.02 | rs10905065               | A  | G  | -0.02220 | 0.03922 |
| rs10957156            | A  | G  | -0.14 | 0.02 | rs10957156               | G  | A  | -0.0101337  | 0.0443606 | rs10957156            | A  | G  | -0.14 | 0.02 | rs10957156               | A  | G  | 0.01013  | 0.04436 |
| rs11031006            | G  | A  | -0.22 | 0.03 | rs11031006               | A  | G  | -0.0935055  | 0.0548423 | rs11031006            | G  | A  | -0.22 | 0.03 | rs11031006               | G  | A  | 0.09351  | 0.05484 |
| rs11668344            | G  | A  | -0.41 | 0.02 | rs11668344               | G  | A  | 0.0118139   | 0.0399256 | rs11668344            | G  | A  | -0.41 | 0.02 | rs11668344               | G  | A  | 0.01181  | 0.03993 |
| rs11738223            | A  | G  | -0.12 | 0.02 | rs11738223               | G  | A  | 0.0280688   | 0.0406686 | rs11738223            | A  | G  | -0.12 | 0.02 | rs11738223               | A  | G  | -0.02807 | 0.04067 |
| rs1183272             | C  | T  | -0.07 | 0.02 | rs1183272                | C  | T  | 0.0274983   | 0.0384904 | rs1183272             | C  | T  | -0.07 | 0.02 | rs1183272                | C  | T  | 0.02750  | 0.03849 |
| rs12142240            | T  | C  | -0.13 | 0.02 | rs12142240               | C  | T  | -0.025963   | 0.0412346 | rs12142240            | T  | C  | -0.13 | 0.02 | rs12142240               | T  | C  | 0.02596  | 0.04123 |
| rs12196873            | A  | C  | -0.16 | 0.03 | rs12196873               | C  | A  | 0.00379956  | 0.0545896 | rs12196873            | A  | C  | -0.16 | 0.03 | rs12196873               | A  | C  | -0.00380 | 0.05459 |
| rs12461110            | A  | G  | -0.17 | 0.02 | rs12461110               | A  | G  | 0.000308302 | 0.0397769 | rs12461110            | A  | G  | -0.17 | 0.02 | rs12461110               | A  | G  | 0.00031  | 0.03978 |
| rs12599106            | A  | T  | -0.12 | 0.02 | rs12599106               | T  | A  | -0.0436909  | 0.0383738 | rs12599106            | A  | T  | -0.12 | 0.02 | rs12599106               | A  | T  | 0.04369  | 0.03837 |
| rs12824058            | G  | A  | -0.14 | 0.02 | rs12824058               | G  | A  | 0.0619927   | 0.0390647 | rs12824058            | G  | A  | -0.14 | 0.02 | rs12824058               | G  | A  | 0.06199  | 0.03906 |
| rs13040088            | G  | A  | -0.16 | 0.02 | rs13040088               | G  | A  | -0.00223773 | 0.0469394 | rs13040088            | G  | A  | -0.16 | 0.02 | rs13040088               | G  | A  | -0.00224 | 0.04694 |
| rs1411478             | A  | G  | -0.13 | 0.02 | rs1411478                | A  | G  | 0.0218985   | 0.0390415 | rs1411478             | A  | G  | -0.13 | 0.02 | rs1411478                | A  | G  | 0.02190  | 0.03904 |
| rs16858210            | G  | A  | -0.14 | 0.02 | rs16858210               | A  | G  | 0.104604    | 0.0446923 | rs16858210            | G  | A  | -0.14 | 0.02 | rs16858210               | G  | A  | -0.10460 | 0.04469 |
| rs16991615            | G  | A  | -0.88 | 0.04 | rs16991615               | A  | G  | 0.0849204   | 0.0776969 | rs16991615            | G  | A  | -0.88 | 0.04 | rs16991615               | G  | A  | -0.08492 | 0.07770 |
| rs1713460             | G  | A  | -0.14 | 0.02 | rs1713460                | G  | A  | 0.0174353   | 0.0412314 | rs1713460             | G  | A  | -0.14 | 0.02 | rs1713460                | G  | A  | 0.01744  | 0.04123 |
| rs1727326             | C  | G  | -0.19 | 0.03 | rs1727326                | C  | G  | -0.190348   | 0.0556898 | rs1727326             | C  | G  | -0.19 | 0.03 | rs1727326                | C  | G  | -0.19035 | 0.05569 |
| rs1799949             | G  | A  | -0.14 | 0.02 | rs1799949                | A  | G  | -0.0622116  | 0.0408268 | rs1799949             | G  | A  | -0.14 | 0.02 | rs1799949                | G  | A  | 0.06221  | 0.04083 |
| rs1800932             | A  | G  | -0.17 | 0.03 | rs1800932                | G  | A  | 0.149384    | 0.0484393 | rs1800932             | A  | G  | -0.17 | 0.03 | rs1800932                | A  | G  | -0.14938 | 0.04844 |
| rs2230365             | C  | T  | -0.17 | 0.03 | rs2230365                | T  | C  | 0.123302    | 0.0550528 | rs2230365             | C  | T  | -0.17 | 0.03 | rs2230365                | C  | T  | -0.12330 | 0.05505 |
| rs2236553             | C  | T  | -0.16 | 0.03 | rs2236553                | C  | T  | 0.0355651   | 0.0451348 | rs2236553             | C  | T  | -0.16 | 0.03 | rs2236553                | C  | T  | 0.03557  | 0.04513 |
| rs2236918             | C  | G  | -0.15 | 0.02 | rs2236918                | C  | G  | -0.0958727  | 0.0385286 | rs2236918             | C  | G  | -0.15 | 0.02 | rs2236918                | C  | G  | -0.09587 | 0.03853 |
| rs2241584             | A  | G  | -0.14 | 0.02 | rs2241584                | A  | G  | 0.0572729   | 0.0397824 | rs2241584             | A  | G  | -0.14 | 0.02 | rs2241584                | A  | G  | 0.05727  | 0.03978 |
| rs2277339             | G  | T  | -0.31 | 0.03 | rs2277339                | G  | T  | -0.117926   | 0.0631604 | rs2277339             | G  | T  | -0.31 | 0.03 | rs2277339                | G  | T  | -0.11793 | 0.06316 |

| Pre-harmonisation     |    |    |       |      |                          |     |     |             |           | Post-harmonisation    |    |    |       |      |                          |             |    |          |         |  |
|-----------------------|----|----|-------|------|--------------------------|-----|-----|-------------|-----------|-----------------------|----|----|-------|------|--------------------------|-------------|----|----------|---------|--|
| Age natural menopause |    |    |       |      | Diastolic blood pressure |     |     |             |           | Age natural menopause |    |    |       |      | Diastolic blood pressure |             |    |          |         |  |
| SNP                   | A1 | A2 | Beta  | se   | SNP                      | A 1 | A 2 | Beta        | SE        | SNP                   | a1 | a2 | beta  | se   | SNP                      | A 1         | A2 | Beta     | SE      |  |
| rs2547274             | G  | C  | -0.28 | 0.04 | rs2547274                | C   | G   | -0.0624217  | 0.0662751 | rs2547274             | G  | C  | -0.28 | 0.04 | rs2547274                | G           | C  | 0.06242  | 0.06628 |  |
| rs2720044             | A  | C  | -0.29 | 0.03 | rs2720044                | C   | A   | -0.00259295 | 0.0517883 | rs2720044             | A  | C  | -0.29 | 0.03 | rs2720044                | A           | C  | 0.00259  | 0.05179 |  |
| rs2941505             | A  | G  | -0.13 | 0.02 | rs2941505                | A   | G   | 0.0541778   | 0.0412672 | rs2941505             | A  | G  | -0.13 | 0.02 | rs2941505                | A           | G  | 0.05418  | 0.04127 |  |
| rs349306              | G  | A  | -0.23 | 0.04 | rs349306                 | G   | A   | 0.032006    | 0.0588684 | rs349306              | G  | A  | -0.23 | 0.04 | rs349306                 | G           | A  | 0.03201  | 0.05887 |  |
| rs365132              | G  | T  | -0.24 | 0.02 | rs365132                 | T   | G   | 0.0272027   | 0.0383385 | rs365132              | G  | T  | -0.24 | 0.02 | rs365132                 | G           | T  | -0.02720 | 0.03834 |  |
| rs3741604             | T  | C  | -0.09 | 0.02 | rs3741604                | C   | T   | 0.0213437   | 0.0384137 | rs3741604             | T  | C  | -0.09 | 0.02 | rs3741604                | T           | C  | -0.02134 | 0.03841 |  |
| rs4246511             | C  | T  | -0.22 | 0.02 | rs4246511                | T   | C   | 0.053419    | 0.0425499 | rs4246511             | C  | T  | -0.22 | 0.02 | rs4246511                | C           | T  | -0.05342 | 0.04255 |  |
| rs427394              | G  | A  | -0.13 | 0.02 | rs427394                 | G   | A   | -0.0388071  | 0.03892   | rs427394              | G  | A  | -0.13 | 0.02 | rs427394                 | G           | A  | -0.03881 | 0.03892 |  |
| rs451417              | A  | C  | -0.2  | 0.03 | rs451417                 | A   | C   | 0.0169453   | 0.0587391 | rs451417              | A  | C  | -0.2  | 0.03 | rs451417                 | A           | C  | 0.01695  | 0.05874 |  |
| rs4693089             | A  | G  | -0.2  | 0.02 | rs4693089                | G   | A   | 0.0152142   | 0.0382873 | rs4693089             | A  | G  | -0.2  | 0.02 | rs4693089                | A           | G  | -0.01521 | 0.03829 |  |
| rs4879656             | A  | C  | -0.12 | 0.02 | rs4879656                | A   | C   | 0.0678728   | 0.0395141 | rs4879656             | A  | C  | -0.12 | 0.02 | rs4879656                | A           | C  | 0.06787  | 0.03951 |  |
| rs4886238             | G  | A  | -0.18 | 0.02 | Excluded QC              |     |     |             |           | rs4886238             | A  | A  | -0.18 | 0.02 | rs4886238                | Excluded QC |    |          |         |  |
| rs551087              | G  | A  | -0.13 | 0.02 | rs551087                 | G   | A   | 0.0488124   | 0.0423673 | rs551087              | G  | A  | -0.13 | 0.02 | rs551087                 | G           | A  | 0.04881  | 0.04237 |  |
| rs5762534             | T  | C  | -0.16 | 0.03 | rs5762534                | C   | T   | 0.104779    | 0.0539062 | rs5762534             | T  | C  | -0.16 | 0.03 | rs5762534                | T           | C  | -0.10478 | 0.05391 |  |
| rs6484478             | G  | A  | -0.1  | 0.02 | rs6484478                | A   | G   | 0.035815    | 0.0455432 | rs6484478             | G  | A  | -0.1  | 0.02 | rs6484478                | G           | A  | -0.03582 | 0.04554 |  |
| rs6856693             | A  | G  | -0.16 | 0.02 | rs6856693                | G   | A   | -0.0760902  | 0.038678  | rs6856693             | A  | G  | -0.16 | 0.02 | rs6856693                | A           | G  | 0.07609  | 0.03868 |  |
| rs6899676             | A  | G  | -0.23 | 0.03 | rs6899676                | G   | A   | 0.00793723  | 0.0479084 | rs6899676             | A  | G  | -0.23 | 0.03 | rs6899676                | A           | G  | -0.00794 | 0.04791 |  |
| rs704795              | A  | G  | -0.16 | 0.02 | rs704795                 | A   | G   | -0.0733563  | 0.0391111 | rs704795              | A  | G  | -0.16 | 0.02 | rs704795                 | A           | G  | -0.07336 | 0.03911 |  |
| rs707938              | G  | A  | -0.17 | 0.02 | rs707938                 | G   | A   | -0.178388   | 0.0410044 | rs707938              | G  | A  | -0.17 | 0.02 | rs707938                 | G           | A  | -0.17839 | 0.04100 |  |
| rs7259376             | A  | G  | -0.11 | 0.02 | rs7259376                | A   | G   | -0.01968    | 0.038394  | rs7259376             | A  | G  | -0.11 | 0.02 | rs7259376                | A           | G  | -0.01968 | 0.03839 |  |
| rs7397861             | G  | C  | -0.1  | 0.02 | rs7397861                | C   | G   | 0.0213642   | 0.0396937 | rs7397861             | G  | C  | -0.1  | 0.02 | rs7397861                | G           | C  | -0.02136 | 0.03969 |  |
| rs763121              | G  | A  | -0.16 | 0.02 | rs763121                 | G   | A   | -0.0613941  | 0.0403425 | rs763121              | G  | A  | -0.16 | 0.02 | rs763121                 | G           | A  | -0.06139 | 0.04034 |  |
| rs8070740             | A  | G  | -0.15 | 0.02 | rs8070740                | G   | A   | -0.0066124  | 0.044759  | rs8070740             | A  | G  | -0.15 | 0.02 | rs8070740                | A           | G  | 0.00661  | 0.04476 |  |
| rs9039                | C  | T  | -0.12 | 0.02 | rs9039                   | C   | T   | 0.0517817   | 0.0431436 | rs9039                | C  | T  | -0.12 | 0.02 | rs9039                   | C           | T  | 0.05178  | 0.04314 |  |
| rs930036              | A  | G  | -0.19 | 0.02 | rs930036                 | A   | G   | 0.136959    | 0.0393574 | rs930036              | A  | G  | -0.19 | 0.02 | rs930036                 | A           | G  | 0.13696  | 0.03936 |  |
| rs9393800             | G  | A  | -0.17 | 0.02 | rs9393800                | G   | A   | -0.0495074  | 0.0435915 | rs9393800             | G  | A  | -0.17 | 0.02 | rs9393800                | G           | A  | -0.04951 | 0.04359 |  |
| rs9796                | T  | A  | -0.13 | 0.02 | rs9796                   | T   | A   | 0.199368    | 0.0383883 | rs9796                | T  | A  | -0.13 | 0.02 | rs9796                   | T           | A  | 0.19937  | 0.03839 |  |
| Pre-harmonisation     |    |    |       |      |                          |     |     |             |           | Post-harmonisation    |    |    |       |      |                          |             |    |          |         |  |

| Pre-harmonisation     |    |    |       |      |                          |    |    |          |         | Post-harmonisation    |    |    |       |      |                          |    |    |          |         |
|-----------------------|----|----|-------|------|--------------------------|----|----|----------|---------|-----------------------|----|----|-------|------|--------------------------|----|----|----------|---------|
| Age natural menopause |    |    |       |      | Diastolic blood pressure |    |    |          |         | Age natural menopause |    |    |       |      | Diastolic blood pressure |    |    |          |         |
| SNP                   | A1 | A2 | Beta  | se   | SNP                      | A1 | A2 | Beta     | SE      | SNP                   | a1 | a2 | beta  | se   | SNP                      | A1 | A2 | Beta     | SE      |
| Age natural menopause |    |    |       |      | Systolic blood pressure  |    |    |          |         | Age natural menopause |    |    |       |      | Systolic blood pressure  |    |    |          |         |
| SNP                   | A1 | A2 | beta  | se   | SNP                      | A1 | A2 | Beta     | SE      | SNP                   | A1 | A2 | beta  | se   | SNP                      | A1 | A2 | Beta     | SE      |
| rs1054875             | T  | A  | -0.19 | 0.02 | rs1054875                | T  | A  | -0.11526 | 0.06477 | rs1054875             | T  | A  | -0.19 | 0.02 | rs1054875                | T  | A  | -0.11526 | 0.06477 |
| rs10734411            | A  | G  | -0.12 | 0.02 | rs10734411               | A  | G  | 0.12274  | 0.06284 | rs10734411            | A  | G  | -0.12 | 0.02 | rs10734411               | A  | G  | 0.12274  | 0.06284 |
| rs10852344            | T  | C  | -0.16 | 0.02 | rs10852344               | C  | T  | 0.24950  | 0.06410 | rs10852344            | T  | C  | -0.16 | 0.02 | rs10852344               | T  | C  | -0.24950 | 0.06410 |
| rs10905065            | A  | G  | -0.11 | 0.02 | rs10905065               | G  | A  | 0.02862  | 0.06437 | rs10905065            | A  | G  | -0.11 | 0.02 | rs10905065               | A  | G  | -0.02862 | 0.06437 |
| rs10957156            | A  | G  | -0.14 | 0.02 | rs10957156               | G  | A  | 0.17936  | 0.07281 | rs10957156            | A  | G  | -0.14 | 0.02 | rs10957156               | A  | G  | -0.17936 | 0.07281 |
| rs11031006            | G  | A  | -0.22 | 0.03 | rs11031006               | A  | G  | -0.21563 | 0.09002 | rs11031006            | G  | A  | -0.22 | 0.03 | rs11031006               | G  | A  | 0.21563  | 0.09002 |
| rs11668344            | G  | A  | -0.41 | 0.02 | rs11668344               | G  | A  | -0.04084 | 0.06553 | rs11668344            | G  | A  | -0.41 | 0.02 | rs11668344               | G  | A  | -0.04084 | 0.06553 |
| rs11738223            | A  | G  | -0.12 | 0.02 | rs11738223               | G  | A  | 0.01652  | 0.06675 | rs11738223            | A  | G  | -0.12 | 0.02 | rs11738223               | A  | G  | -0.01652 | 0.06675 |
| rs1183272             | C  | T  | -0.07 | 0.02 | rs1183272                | C  | T  | -0.02591 | 0.06318 | rs1183272             | C  | T  | -0.07 | 0.02 | rs1183272                | C  | T  | -0.02591 | 0.06318 |
| rs12142240            | T  | C  | -0.13 | 0.02 | rs12142240               | C  | T  | 0.09646  | 0.06768 | rs12142240            | T  | C  | -0.13 | 0.02 | rs12142240               | T  | C  | -0.09646 | 0.06768 |
| rs12196873            | A  | C  | -0.16 | 0.03 | rs12196873               | C  | A  | 0.13502  | 0.08960 | rs12196873            | A  | C  | -0.16 | 0.03 | rs12196873               | A  | C  | -0.13502 | 0.08960 |
| rs12461110            | A  | G  | -0.17 | 0.02 | rs12461110               | A  | G  | -0.06872 | 0.06529 | rs12461110            | A  | G  | -0.17 | 0.02 | rs12461110               | A  | G  | -0.06872 | 0.06529 |
| rs12599106            | A  | T  | -0.12 | 0.02 | rs12599106               | T  | A  | 0.03619  | 0.06299 | rs12599106            | A  | T  | -0.12 | 0.02 | rs12599106               | A  | T  | -0.03619 | 0.06299 |
| rs12824058            | G  | A  | -0.14 | 0.02 | rs12824058               | G  | A  | 0.09007  | 0.06412 | rs12824058            | G  | A  | -0.14 | 0.02 | rs12824058               | G  | A  | 0.09007  | 0.06412 |
| rs13040088            | G  | A  | -0.16 | 0.02 | rs13040088               | G  | A  | 0.01994  | 0.07705 | rs13040088            | G  | A  | -0.16 | 0.02 | rs13040088               | G  | A  | 0.01994  | 0.07705 |
| rs1411478             | A  | G  | -0.13 | 0.02 | rs1411478                | A  | G  | -0.07501 | 0.06408 | rs1411478             | A  | G  | -0.13 | 0.02 | rs1411478                | A  | G  | -0.07501 | 0.06408 |
| rs16858210            | G  | A  | -0.14 | 0.02 | rs16858210               | A  | G  | 0.10218  | 0.07336 | rs16858210            | G  | A  | -0.14 | 0.02 | rs16858210               | G  | A  | -0.10218 | 0.07336 |
| rs16991615            | G  | A  | -0.88 | 0.04 | rs16991615               | A  | G  | 0.31663  | 0.12753 | rs16991615            | G  | A  | -0.88 | 0.04 | rs16991615               | G  | A  | -0.31663 | 0.12753 |
| rs1713460             | G  | A  | -0.14 | 0.02 | rs1713460                | G  | A  | 0.07564  | 0.06768 | rs1713460             | G  | A  | -0.14 | 0.02 | rs1713460                | G  | A  | 0.07564  | 0.06768 |
| rs1727326             | C  | G  | -0.19 | 0.03 | rs1727326                | C  | G  | 0.02907  | 0.09142 | rs1727326             | C  | G  | -0.19 | 0.03 | rs1727326                | C  | G  | 0.02907  | 0.09142 |
| rs1799949             | G  | A  | -0.14 | 0.02 | rs1799949                | A  | G  | -0.01027 | 0.06701 | rs1799949             | G  | A  | -0.14 | 0.02 | rs1799949                | G  | A  | 0.01027  | 0.06701 |
| rs1800932             | A  | G  | -0.17 | 0.03 | rs1800932                | G  | A  | 0.11622  | 0.07951 | rs1800932             | A  | G  | -0.17 | 0.03 | rs1800932                | A  | G  | -0.11622 | 0.07951 |
| rs2230365             | C  | T  | -0.17 | 0.03 | rs2230365                | T  | C  | 0.21172  | 0.09036 | rs2230365             | C  | T  | -0.17 | 0.03 | rs2230365                | C  | T  | -0.21172 | 0.09036 |
| rs2236553             | C  | T  | -0.16 | 0.03 | rs2236553                | C  | T  | 0.01891  | 0.07409 | rs2236553             | C  | T  | -0.16 | 0.03 | rs2236553                | C  | T  | 0.01891  | 0.07409 |
| rs2236918             | C  | G  | -0.15 | 0.02 | rs2236918                | C  | G  | -0.17409 | 0.06324 | rs2236918             | C  | G  | -0.15 | 0.02 | rs2236918                | C  | G  | -0.17409 | 0.06324 |
| rs2241584             | A  | G  | -0.14 | 0.02 | rs2241584                | A  | G  | 0.11333  | 0.06530 | rs2241584             | A  | G  | -0.14 | 0.02 | rs2241584                | A  | G  | 0.11333  | 0.06530 |

| Pre-harmonisation     |    |    |       |      |                          |     |     |          |         | Post-harmonisation    |    |    |       |      |                          |             |    |          |         |  |
|-----------------------|----|----|-------|------|--------------------------|-----|-----|----------|---------|-----------------------|----|----|-------|------|--------------------------|-------------|----|----------|---------|--|
| Age natural menopause |    |    |       |      | Diastolic blood pressure |     |     |          |         | Age natural menopause |    |    |       |      | Diastolic blood pressure |             |    |          |         |  |
| SNP                   | A1 | A2 | Beta  | se   | SNP                      | A 1 | A 2 | Beta     | SE      | SNP                   | a1 | a2 | beta  | se   | SNP                      | A 1         | A2 | Beta     | SE      |  |
| rs2277339             | G  | T  | -0.31 | 0.03 | rs2277339                | G   | T   | -0.14484 | 0.10367 | rs2277339             | G  | T  | -0.31 | 0.03 | rs2277339                | G           | T  | -0.14484 | 0.10367 |  |
| rs2547274             | G  | C  | -0.28 | 0.04 | rs2547274                | C   | G   | -0.09185 | 0.10878 | rs2547274             | G  | C  | -0.28 | 0.04 | rs2547274                | G           | C  | 0.09185  | 0.10878 |  |
| rs2720044             | A  | C  | -0.29 | 0.03 | rs2720044                | C   | A   | -0.00244 | 0.08501 | rs2720044             | A  | C  | -0.29 | 0.03 | rs2720044                | A           | C  | 0.00244  | 0.08501 |  |
| rs2941505             | A  | G  | -0.13 | 0.02 | rs2941505                | A   | G   | -0.00580 | 0.06774 | rs2941505             | A  | G  | -0.13 | 0.02 | rs2941505                | A           | G  | -0.00580 | 0.06774 |  |
| rs349306              | G  | A  | -0.23 | 0.04 | rs349306                 | G   | A   | -0.15940 | 0.09663 | rs349306              | G  | A  | -0.23 | 0.04 | rs349306                 | G           | A  | -0.15940 | 0.09663 |  |
| rs365132              | G  | T  | -0.24 | 0.02 | rs365132                 | T   | G   | 0.11753  | 0.06293 | rs365132              | G  | T  | -0.24 | 0.02 | rs365132                 | G           | T  | -0.11753 | 0.06293 |  |
| rs3741604             | T  | C  | -0.09 | 0.02 | rs3741604                | C   | T   | 0.02098  | 0.06305 | rs3741604             | T  | C  | -0.09 | 0.02 | rs3741604                | T           | C  | -0.02098 | 0.06305 |  |
| rs4246511             | C  | T  | -0.22 | 0.02 | rs4246511                | T   | C   | 0.13183  | 0.06984 | rs4246511             | C  | T  | -0.22 | 0.02 | rs4246511                | C           | T  | -0.13183 | 0.06984 |  |
| rs427394              | G  | A  | -0.13 | 0.02 | rs427394                 | G   | A   | -0.04612 | 0.06388 | rs427394              | G  | A  | -0.13 | 0.02 | rs427394                 | G           | A  | -0.04612 | 0.06388 |  |
| rs451417              | A  | C  | -0.2  | 0.03 | rs451417                 | A   | C   | -0.02112 | 0.09641 | rs451417              | A  | C  | -0.2  | 0.03 | rs451417                 | A           | C  | -0.02112 | 0.09641 |  |
| rs4693089             | A  | G  | -0.2  | 0.02 | rs4693089                | G   | A   | 0.07425  | 0.06284 | rs4693089             | A  | G  | -0.2  | 0.02 | rs4693089                | A           | G  | -0.07425 | 0.06284 |  |
| rs4879656             | A  | C  | -0.12 | 0.02 | rs4879656                | A   | C   | 0.09534  | 0.06486 | rs4879656             | A  | C  | -0.12 | 0.02 | rs4879656                | A           | C  | 0.09534  | 0.06486 |  |
| rs4886238             | G  | A  | -0.18 | 0.02 | Excluded QC              |     |     |          |         | rs4886238             | G  | A  | -0.18 | 0.02 | rs4886238                | Excluded QC |    |          |         |  |
| rs551087              | G  | A  | -0.13 | 0.02 | rs551087                 | G   | A   | 0.11758  | 0.06954 | rs551087              | G  | A  | -0.13 | 0.02 | rs551087                 | G           | A  | 0.11758  | 0.06954 |  |
| rs5762534             | T  | C  | -0.16 | 0.03 | rs5762534                | C   | T   | 0.32279  | 0.08848 | rs5762534             | T  | C  | -0.16 | 0.03 | rs5762534                | T           | C  | -0.32279 | 0.08848 |  |
| rs6484478             | G  | A  | -0.1  | 0.02 | rs6484478                | A   | G   | -0.04828 | 0.07476 | rs6484478             | G  | A  | -0.1  | 0.02 | rs6484478                | G           | A  | 0.04828  | 0.07476 |  |
| rs6856693             | A  | G  | -0.16 | 0.02 | rs6856693                | G   | A   | -0.12295 | 0.06349 | rs6856693             | A  | G  | -0.16 | 0.02 | rs6856693                | A           | G  | 0.12295  | 0.06349 |  |
| rs6899676             | A  | G  | -0.23 | 0.03 | rs6899676                | G   | A   | -0.03488 | 0.07864 | rs6899676             | A  | G  | -0.23 | 0.03 | rs6899676                | A           | G  | 0.03488  | 0.07864 |  |
| rs704795              | A  | G  | -0.16 | 0.02 | rs704795                 | A   | G   | -0.20850 | 0.06420 | rs704795              | A  | G  | -0.16 | 0.02 | rs704795                 | A           | G  | -0.20850 | 0.06420 |  |
| rs707938              | G  | A  | -0.17 | 0.02 | rs707938                 | G   | A   | -0.31493 | 0.06731 | rs707938              | G  | A  | -0.17 | 0.02 | rs707938                 | G           | A  | -0.31493 | 0.06731 |  |
| rs7259376             | A  | G  | -0.11 | 0.02 | rs7259376                | A   | G   | -0.10956 | 0.06302 | rs7259376             | A  | G  | -0.11 | 0.02 | rs7259376                | A           | G  | -0.10956 | 0.06302 |  |
| rs7397861             | G  | C  | -0.1  | 0.02 | rs7397861                | C   | G   | 0.04052  | 0.06515 | rs7397861             | G  | C  | -0.1  | 0.02 | rs7397861                | G           | C  | -0.04052 | 0.06515 |  |
| rs763121              | G  | A  | -0.16 | 0.02 | rs763121                 | G   | A   | -0.04170 | 0.06622 | rs763121              | G  | A  | -0.16 | 0.02 | rs763121                 | G           | A  | -0.04170 | 0.06622 |  |
| rs8070740             | A  | G  | -0.15 | 0.02 | rs8070740                | G   | A   | -0.01549 | 0.07347 | rs8070740             | A  | G  | -0.15 | 0.02 | rs8070740                | A           | G  | 0.01549  | 0.07347 |  |
| rs9039                | C  | T  | -0.12 | 0.02 | rs9039                   | C   | T   | 0.02521  | 0.07082 | rs9039                | C  | T  | -0.12 | 0.02 | rs9039                   | C           | T  | 0.02521  | 0.07082 |  |
| rs930036              | A  | G  | -0.19 | 0.02 | rs930036                 | A   | G   | 0.22466  | 0.06460 | rs930036              | A  | G  | -0.19 | 0.02 | rs930036                 | A           | G  | 0.22466  | 0.06460 |  |
| rs9393800             | G  | A  | -0.17 | 0.02 | rs9393800                | G   | A   | -0.11434 | 0.07155 | rs9393800             | G  | A  | -0.17 | 0.02 | rs9393800                | G           | A  | -0.11434 | 0.07155 |  |
| rs9796                | T  | A  | -0.13 | 0.02 | rs9796                   | T   | A   | 0.20068  | 0.06301 | rs9796                | T  | A  | -0.13 | 0.02 | rs9796                   | T           | A  | 0.20068  | 0.06301 |  |

TABLE S5. OBSERVATIONAL ASSOCIATION BETWEEN AGE OF NATURAL MENOPAUSE AND BLOOD PRESSURE TRAITS

| ANM                      | Model 1             |        | Model 2             |       | Model 3             |       | p trend |
|--------------------------|---------------------|--------|---------------------|-------|---------------------|-------|---------|
|                          | $\beta$ (95% CI)    | p      | $\beta$ (95% CI)    | p     | $\beta$ (95% CI)    | p     |         |
| Systolic Blood Pressure  |                     |        |                     |       |                     |       |         |
| CoLaus                   |                     |        |                     |       |                     |       |         |
| Continuous               | 0.32 (0.07;0.56)    | 0.013  | 0.01(-0.23;0.26)    | 0.921 | -0.01(-0.25;0.23)   | 0.939 |         |
| Categories               |                     |        |                     |       |                     |       |         |
| Early                    | -2.71(-6.39;0.97)   | 0.149  | 0.20(-3.35;3.75)    | 0.913 | 0.17(-3.36;3.71)    | 0.923 |         |
| Intermediate             | -2.70(-5.22;-0.18)  | 0.036  | -0.99(-3.41;1.43)   | 0.422 | -0.74(-3.17;1.67)   | 0.545 | 0.533   |
| Normal                   | Ref                 | Ref    | Ref                 | Ref   | Ref                 | Ref   |         |
| Late                     | 2.76(-0.32;5.85)    | 0.079  | 0.88(-2.09;3.84)    | 0.561 | 0.86(-2.09;3.82)    | 0.566 |         |
| RS-I-3                   |                     |        |                     |       |                     |       |         |
| Continuous               | 0.12(-0.14;0.38)    | 0.378  | 0.18(-0.08;0.44)    | 0.164 | 0.18(-0.08;0.44)    | 0.179 |         |
| Categories               |                     |        |                     |       |                     |       |         |
| Early                    | -0.66(-4.31;2.99)   | 0.722  | -1.81(-5.43;1.81)   | 0.327 | -1.73(-5.35;1.89)   | 0.349 | 0.383   |
| Intermediate             | -0.41(-2.89;2.06)   | 0.743  | -0.67(-3.12;1.77)   | 0.590 | -0.58(-3.03;1.86)   | 0.639 |         |
| Normal                   | Ref                 | Ref    | Ref                 | Ref   | Ref                 | Ref   |         |
| Late                     | 0.83(-2.69;4.34)    | 0.644  | 0.34(-3.14;3.81)    | 0.849 | 0.53(-2.94;4.01)    | 0.763 |         |
| RS-II-1                  |                     |        |                     |       |                     |       |         |
| Continuous               | -0.19(-0.55;0.17)   | 0.296  | -0.12(-0.45;0.21)   | 0.484 | -0.07(-0.41;0.27)   | 0.687 |         |
| Categories               |                     |        |                     |       |                     |       |         |
| Early                    | -1.66(-6.94;3.62)   | 0.537  | -2.17(-7.07;2.72)   | 0.384 | -2.79(-7.76;2.18)   | 0.272 | 0.556   |
| Intermediate             | 3.51(-0.11;7.13)    | 0.058  | 2.70(-0.66;6.06)    | 0.115 | 2.62(-0.75;5.99)    | 0.128 |         |
| Normal                   | Ref                 | Ref    | Ref                 | Ref   | Ref                 | Ref   |         |
| Late                     | -1.83(-5.81;2.16)   | 0.369  | -1.82(-5.51;1.87)   | 0.333 | -1.61(-5.32;2.10)   | 0.395 |         |
| RS-III-1                 |                     |        |                     |       |                     |       |         |
| Continuous               | 0.67(0.33;1.01)     | <0.001 | 0.52(0.19;0.85)     | 0.002 | 0.52(0.18;0.86)     | 0.003 |         |
| Categories               |                     |        |                     |       |                     |       |         |
| Early                    | -6.60(-11.78;-1.43) | 0.012  | -5.89(-10.92;-0.86) | 0.022 | -5.69(-10.76;-0.63) | 0.028 | 0.01    |
| Intermediate             | -4.55(-7.71;-1.39)  | 0.005  | -3.37(-6.46;-0.29)  | 0.032 | -3.28(-6.38;-0.18)  | 0.038 |         |
| Normal                   | Ref                 | Ref    | Ref                 | Ref   | Ref                 | Ref   |         |
| Late                     | 1.97(-1.83;5.77)    | 0.309  | 0.88(-2.83;4.59)    | 0.641 | 0.98(-2.74;4.70)    | 0.606 |         |
| Diastolic Blood Pressure |                     |        |                     |       |                     |       |         |

| ANM          | Model 1            |       | Model 2            |       | Model 3            |       | p trend |
|--------------|--------------------|-------|--------------------|-------|--------------------|-------|---------|
|              | $\beta$ (95% CI)   | p     | $\beta$ (95% CI)   | p     | $\beta$ (95% CI)   | p     |         |
| CoLaus       |                    |       |                    |       |                    |       |         |
| Continuous   | 0.1(-0.04;0.24)    | 0.148 | 0.16(0.01;0.30)    | 0.031 | 0.14(-0.04;0.28)   | 0.058 |         |
| Categories   |                    |       |                    |       |                    |       |         |
| Early        | -2.21(-4.30;-0.11) | 0.039 | -2.67(-4.77;-0.57) | 0.013 | -2.66(-4.75;-0.57) | 0.013 | 0.04    |
| Intermediate | -0.70(-2.13;0.73)  | 0.337 | -0.82(-2.26;0.61)  | 0.261 | -0.82(-2.26;0.61)  | 0.259 |         |
| Normal       | Ref                | Ref   | Ref                | Ref   | Ref                | Ref   |         |
| Late         | -0.35(-2.11;1.40)  | 0.693 | 0.03(-1.78;1.72)   | 0.973 | -0.15(-1.89;1.60)  | 0.868 |         |
| RS-I-3       |                    |       |                    |       |                    |       |         |
| Continuous   | 0.00(-0.14;0.13)   | 0.957 | -0.02(-0.16;0.11)  | 0.74  | -0.03(-0.17;0.11)  | 0.674 |         |
| Categories   |                    |       |                    |       |                    |       |         |
| Early        | 0.09(-1.80;1.98)   | 0.923 | 0.43(-1.46;2.32)   | 0.655 | 0.48(-1.42;2.37)   | 0.621 | 0.364   |
| Intermediate | 0.63(-0.65;1.91)   | 0.337 | 0.70(-0.57;1.98)   | 0.28  | 0.73(-0.55;2.00)   | 0.265 |         |
| Normal       | Ref                | Ref   | Ref                | Ref   | Ref                | Ref   |         |
| Late         | 0.21(-1.61;2.03)   | 0.824 | 0.35(-1.46;2.16)   | 0.704 | 0.32(-1.50;2.13)   | 0.734 |         |
| RS-II-1      |                    |       |                    |       |                    |       |         |
| Continuous   | -0.01(-0.19;0.17)  | 0.883 | -0.02(-0.20;0.16)  | 0.854 | -0.03(-0.22;0.15)  | 0.737 |         |
| Categories   |                    |       |                    |       |                    |       |         |
| Early        | -1.19(-3.84;1.47)  | 0.380 | -1.16(-3.82;1.49)  | 0.390 | -1.03(-3.72;1.67)  | 0.454 | 0.757   |
| Intermediate | 0.25(-1.57;2.07)   | 0.791 | 0.28(-1.54;2.11)   | 0.760 | 0.31(-1.52;2.14)   | 0.739 |         |
| Normal       | Ref                | Ref   | Ref                | Ref   | Ref                | Ref   |         |
| Late         | -0.76(-2.76;1.24)  | 0.457 | -0.76(-2.76;1.24)  | 0.457 | -0.84(-2.85;1.18)  | 0.415 |         |
| RS-III-1     |                    |       |                    |       |                    |       |         |
| Continuous   | 0.28(0.09;0.48)    | 0.004 | 0.27(0.08;0.46)    | 0.006 | 0.24(0.05;0.44)    | 0.014 |         |
| Categories   |                    |       |                    |       |                    |       |         |
| Early        | -3.64(-6.53;-0.74) | 0.014 | -3.56(-6.46;-0.66) | 0.016 | -3.30(-6.21;-0.38) | 0.027 | 0.053   |
| Intermediate | -0.76(-2.53;1.01)  | 0.399 | -0.63(-2.41;1.14)  | 0.484 | -0.51(-2.30;1.27)  | 0.572 |         |
| Normal       | Ref                | Ref   | Ref                | Ref   | Ref                | Ref   |         |
| Late         | 1.47(-0.66;3.60)   | 0.175 | 1.35(-0.78;3.49)   | 0.213 | 1.27(-0.88;3.41)   | 0.246 |         |
| Hypertension |                    |       |                    |       |                    |       |         |
| CoLaus       |                    |       |                    |       |                    |       |         |
| Continuous   | 1.04(1.01;1.07)    | 0.006 | 1.01(0.98;1.04)    | 0.38  | 1.01(0.98;1.04)    | 0.477 |         |

| ANM          | Model 1         |       | Model 2         |       | Model 3         |       | p trend |
|--------------|-----------------|-------|-----------------|-------|-----------------|-------|---------|
|              | β(95% CI)       | p     | β(95% CI)       | p     | β(95% CI)       | p     |         |
| Categories   |                 |       |                 |       |                 |       |         |
| Early        | 0.64(0.42;0.98) | 0.039 | 0.81(0.52;1.27) | 0.358 | 0.80(0.51;1.25) | 0.327 | 0.181   |
| Intermediate | 0.80(0.61;1.07) | 0.133 | 0.94(0.70;1.26) | 0.667 | 0.95(0.71;1.29) | 0.76  |         |
| Normal       | Ref             | Ref   | Ref             | Ref   | Ref             | Ref   |         |
| Late         | 1.26(0.89;1.77) | 0.193 | 1.06(0.75;1.51) | 0.741 | 1.02(0.74;1.50) | 0.898 |         |
| RS-I-3       |                 |       |                 |       |                 |       |         |
| Continuous   | 1.01(0.98;1.04) | 0.555 | 1.02(0.99;1.05) | 0.166 | 1.02(0.99;1.05) | 0.148 | 0.551   |
| Categories   |                 |       |                 |       |                 |       |         |
| Early        | 1.19(0.81;1.74) | 0.380 | 0.97(0.65;1.44) | 0.260 | 0.96(0.65;1.43) | 0.849 |         |
| Intermediate | 1.08(0.84;1.39) | 0.549 | 1.04(0.80;1.34) | 0.860 | 1.04(0.80;1.35) | 0.786 |         |
| Normal       | Ref             | Ref   | Ref             | Ref   | Ref             | Ref   |         |
| Late         | 1.30(0.89;1.89) | 0.17  | 1.18(0.81;1.73) | 0.792 | 1.24(0.84;1.82) | 0.282 |         |
| RS-II-1      |                 |       |                 |       |                 |       |         |
| Continuous   | 1.01(0.97;1.04) | 0.667 | 1.02(0.98;1.05) | 0.425 | 1.02(0.98;1.06) | 0.317 | 0.866   |
| Categories   |                 |       |                 |       |                 |       |         |
| Early        | 1.05(0.62;1.77) | 0.866 | 0.96(0.55;1.68) | 0.889 | 0.91(0.51;1.62) | 0.751 |         |
| Intermediate | 1.24(0.86;1.80) | 0.248 | 1.16(0.79;1.71) | 0.453 | 1.15(0.78;1.70) | 0.488 |         |
| Normal       | Ref             | Ref   | Ref             | Ref   | Ref             | Ref   |         |
| Late         | 1.09(0.73;1.63) | 0.665 | 1.06(0.70;1.61) | 0.792 | 1.06(0.69;1.62) | 0.796 |         |
| RS-III-1     |                 |       |                 |       |                 |       |         |
| Continuous   | 1.03(1.00;1.07) | 0.064 | 1.02(0.98;1.06) | 0.273 | 1.02(0.98;1.06) | 0.271 | 0.062   |
| Categories   |                 |       |                 |       |                 |       |         |
| Early        | 0.81(0.48;1.38) | 0.437 | 0.85(0.49;1.46) | 0.553 | 0.88(0.51;1.52) | 0.637 |         |
| Intermediate | 0.98(0.71;1.34) | 0.877 | 1.08(0.78;1.50) | 0.640 | 1.09(0.78;1.52) | 0.628 |         |
| Normal       | Ref             | Ref   | Ref             | Ref   | Ref             | Ref   |         |
| Late         | 1.70(1.15;2.51) | 0.008 | 1.54(1.03;2.29) | 0.034 | 1.58(1.06;2.37) | 0.026 |         |

OR= Odds ratio; CI=Confidence interval

Model 1: Antihypertensive medication.

Model 2: Antihypertensive medication, age.

Model 3: Antihypertensive medication, age, smoking status, drinking status, education level

Colaus (n=1139), RS-I-3 (n=1603), RS-II-1 (n=790), RS-III-1 (n= 919)



TABLE S6. P VALUES FOR INTERACTION BETWEEN AGE OF NATURAL MENOPAUSE AND BODY MASS INDEX

|          | SBP   | DBP*  | Hypertension |
|----------|-------|-------|--------------|
| CoLaus   | 0.108 | 0.079 | 0.054        |
| RS-I-3   | 0.430 | 0.482 | 0.101        |
| RS-II-1  | 0.269 | 0.079 | 0.205        |
| RS-III-1 | 0.564 | 0.841 | 0.549        |

Results based on the fully adjusted model (Model 4). SBP=systolic blood pressure, DBP=diastolic blood pressure, \* 3 Observations deleted

TABLE S7. COMPARISON OF ESTIMATES ROTTERDAM STUDY IMPUTED VS WITHOUT IMPUTATION

| Cohort       |                   | RS-I-3                   |                   |                               |                   | RS-II-1          |                    |                             |                     | RS-III-1         |                    |                             |  |
|--------------|-------------------|--------------------------|-------------------|-------------------------------|-------------------|------------------|--------------------|-----------------------------|---------------------|------------------|--------------------|-----------------------------|--|
|              |                   | Imputed<br>n=1,603       |                   | Without imputation<br>n=1,330 |                   | Imputed<br>n=790 |                    | Without imputation<br>n=265 |                     | Imputed<br>n=919 |                    | Without imputation<br>n=676 |  |
| Trait        |                   | Systolic Blood Pressure  |                   |                               |                   |                  |                    |                             |                     |                  |                    |                             |  |
| ANM          | $\beta$ (95% CI)  | p                        | $\beta$ (95% CI)  | p                             | $\beta$ (95% CI)  | p                | $\beta$ (95% CI)   | p                           | $\beta$ (95% CI)    | p                | $\beta$ (95% CI)   | p                           |  |
| Continuous   | 0.15(-0.11;0.40)  | 0.272                    | 0.28(-0.01;0.56)  | 0.055                         | -0.05(-0.38;0.28) | 0.769            | 0.28(-0.26;0.83)   | 0.305                       | 0.45(0.11;0.78)     | 0.010            | 0.31(-0.08;0.69)   | 0.119                       |  |
| Categories   |                   |                          |                   |                               |                   |                  |                    |                             |                     |                  |                    |                             |  |
| Early        | -1.83(-5.43;1.77) | 0.318                    | -3.88(-7.79;0.04) | 0.052                         | -2.86(-7.76;2.03) | 0.251            | -6.15(-13.52;1.22) | 0.102                       | -5.51(-10.50;-0.52) | 0.031            | -5.17(-10.83;0.48) | 0.073                       |  |
| Intermediate | -0.59(-3.02;1.84) | 0.318                    | -1.05(-3.72;1.62) | 0.442                         | 2.30(-1.01;5.61)  | 0.174            | 0.11(-5.32;5.54)   | 0.968                       | -2.88(-5.95;0.19)   | 0.066            | -2.39(-5.96;1.18)  | 0.189                       |  |
| Normal       |                   |                          |                   |                               |                   |                  | Ref                |                             |                     |                  |                    |                             |  |
| Late         | -0.21(-3.67;3.26) | 0.906                    | -0.83(-4.59;2.93) | 0.664                         | -1.68(-5.33;1.97) | 0.367            | -0.94(-7.05;5.16)  | 0.761                       | 0.57(-3.10;4.24)    | 0.761            | -1.17(-5.30;2.96)  | 0.579                       |  |
| Trait        |                   | Diastolic Blood Pressure |                   |                               |                   |                  |                    |                             |                     |                  |                    |                             |  |
| Continuous   | -0.05(-0.18;0.09) | 0.511                    | 0.00(-0.15;0.14)  | 0.953                         | -0.05(-0.23;0.14) | 0.619            | -0.04(-0.34;0.25)  | 0.767                       | 0.17(-0.02;0.36)    | 0.082            | 0.09(-0.12;0.31)   | 0.408                       |  |
| Categories   |                   |                          |                   |                               |                   |                  |                    |                             |                     |                  |                    |                             |  |
| Early        | 0.45(-1.43;2.32)  | 0.641                    | -0.12(-2.20;1.95) | 0.906                         | -1.13(-3.78;1.53) | 0.405            | 0.74(-3.31;4.78)   | 0.720                       | -2.99(-5.80;-0.19)  | 0.036            | -2.28(-5.42;0.86)  | 0.155                       |  |
| Intermediate | 0.72(-0.55;1.99)  | 0.268                    | 0.79(-0.62;2.20)  | 0.272                         | 0.34(-1.45;2.14)  | 0.709            | 0.44(-2.53;3.42)   | 0.769                       | -0.05(-1.78;1.67)   | 0.951            | 0.19(-1.80;2.17)   | 0.855                       |  |
| Normal       |                   |                          |                   |                               |                   |                  | Ref                |                             |                     |                  |                    |                             |  |
| Late         | -0.02(-1.83;1.79) | 0.983                    | -0.02(-2.01;1.97) | 0.988                         | -0.96(-2.95;1.02) | 0.342            | 0.03(-3.32;3.38)   | 0.986                       | 0.93(-1.13;2.99)    | 0.378            | 0.09(-2.20;2.39)   | 0.936                       |  |
| Trait        |                   | Hypertension             |                   |                               |                   |                  |                    |                             |                     |                  |                    |                             |  |
|              |                   | n=1,603                  |                   | n=1,455                       |                   | n=790            |                    | n=315                       |                     | n=919            |                    | n=763                       |  |
| ANM          | OR(95% CI)        | p                        | OR(95% CI)        | p                             | OR(95% CI)        | p                | OR (95% CI)        | p                           | OR (95% CI)         | p                | OR (95% CI)        | p                           |  |
| Continuous   | 1.02(0.99;1.05)   | 0.152                    | 1.03(1.00;1.07)   | 0.068                         | 1.03(0.99;1.07)   | 0.198            | 1.06(0.98;1.14)    | 0.134                       | 1.03(0.99;1.07)     | 0.156            | 1.03(0.98;1.08)    | 0.195                       |  |
| Categories   |                   |                          |                   |                               |                   |                  |                    |                             |                     |                  |                    |                             |  |
| Early        | 0.92(0.61;1.39)   | 0.693                    | 0.74(0.47;1.16)   | 0.185                         | 0.91(0.50;1.67)   | 0.772            | 0.68(0.26;1.81)    | 0.442                       | 0.76(0.43;1.35)     | 0.346            | 0.68(0.35;1.33)    | 0.264                       |  |
| Intermediate | 1.04(0.79;1.37)   | 0.780                    | 1.03(0.76;1.40)   | 0.863                         | 1.05(0.69;1.59)   | 0.819            | 0.92(0.44;1.95)    | 0.838                       | 0.99(0.69;1.41)     | 0.945            | 0.89(0.58;1.36)    | 0.589                       |  |
| Normal       |                   |                          |                   |                               |                   |                  | Ref                |                             |                     |                  |                    |                             |  |
| Late         | 1.17(0.79;1.75)   | 0.429                    | 1.15(0.74;1.79)   | 0.535                         | 1.03(0.66;1.62)   | 0.891            | 1.42(0.61;3.26)    | 0.414                       | 1.50(0.98;2.29)     | 0.061            | 1.31(0.80;2.12)    | 0.283                       |  |

OR= Odds ratio; CI=Confidence interval

Models adjusted for age and glomerular filtration rate, body mass index, total cholesterol, drinking status, education level, smoking status, prevalent Type 2 diabetes, history of cardiovascular diseases, statin use, hormone replacement therapy, antihypertensive medication.

TABLE S8. SENSITIVITY ANALYSIS OBSERVATIONAL ESTIMATES OF THE ASSOCIATION BETWEEN CATEGORIES OF ANM AND BP TRAITS

| Patients excluded | Hormone Therapy    | >65 years          | History of CVD     | >10 years menopause | Hypertension       | HTA defined as use of antihypertensive medication | HTA defined as use of antihypertensive medication & eGFR <60 ml/min/1.73m2 |
|-------------------|--------------------|--------------------|--------------------|---------------------|--------------------|---------------------------------------------------|----------------------------------------------------------------------------|
| Outcomes          | $\beta$ (95% CI)   | $\beta$ (95% CI)   | $\beta$ (95% CI)   | $\beta$ (95% CI)    | $\beta$ (95% CI)   | $\beta$ (95% CI)                                  | $\beta$ (95% CI)                                                           |
| Systolic BP       |                    |                    |                    |                     |                    |                                                   |                                                                            |
| Early             | -2.95(-5.28;-0.62) | -1.35(-4.10;1.39)  | -1.53(-3.67;0.61)  | 0.03(-0.94;0.99)    | -0.94(-2.65;0.76)  | -                                                 | -                                                                          |
| Intermediate      | -0.26(-1.80;1.29)  | -1.06(-2.84;0.73)  | -0.44(-1.86;0.98)  | -0.90(-3.71;1.91)   | -0.56(-1.71;0.60)  | -                                                 | -                                                                          |
| Normal            | Ref                | Ref                | Ref                | Ref                 | Ref                |                                                   |                                                                            |
| Late              | 0.50(-1.45;2.45)   | -1.04(-3.22;1.14)  | -0.31(-2.06;1.44)  | -0.88(-3.32;1.57)   | -1.24(-2.77;0.28)  | -                                                 | -                                                                          |
| Diastolic BP      |                    |                    |                    |                     |                    |                                                   |                                                                            |
| Early             | -1.29(-2.56;-0.02) | -2.07(-3.65;-0.50) | -1.44(-2.63;-0.26) | -2.03(-8.28;4.21)   | -1.23(-2.44;-0.02) | -                                                 | -                                                                          |
| Intermediate      | 0.32(-0.53;1.16)   | -0.22(-1.24;0.79)  | 0.17(-0.62;0.95)   | -0.22(-1.87;1.42)   | -0.14(-0.96;0.68)  | -                                                 | -                                                                          |
| Normal            | Ref                | Ref                | Ref                | Ref                 | Ref                |                                                   |                                                                            |
| Late              | 0.16(-0.91;1.23)   | -0.35(-1.60;0.89)  | 0.03(-0.94;0.19)   | -0.35(-1.75;1.05)   | -0.56(-1.64;0.53)  | -                                                 | -                                                                          |
| Hypertension      | OR(95% CI)         | OR(95% CI)         | OR(95% CI)         | OR(95% CI)          | OR(95% CI)         | OR(95% CI)                                        | OR(95% CI)                                                                 |
| Early             | 0.71(0.53;0.94)    | 0.83(0.58;1.17)    | 0.82(0.63;1.06)    | 0.47(0.17;1.28)     | -                  | 1.08(0.83;1.41)                                   | 1.09(0.81;1.46)                                                            |
| Intermediate      | 1.01(0.84;1.21)    | 0.98(0.78;1.23)    | 1.02(0.86;1.21)    | 0.95(0.64;1.39)     | -                  | 0.99(0.83;1.18)                                   | 1.01(0.83;1.24)                                                            |
| Normal            | Ref                | Ref                | Ref                | Ref                 |                    | Ref                                               | Ref                                                                        |
| Late              | 1.22(0.97;1.55)    | 1.14(0.87;1.49)    | 1.15(0.94;1.42)    | 1.31(0.96;1.79)     | -                  | 1.28(1.03;1.58)                                   | 1.26(0.10;1.59)                                                            |

OR= Odds ratio; CI=Confidence interval

Patients excluded= Patients with the characteristic e.g., hormone therapy use etc. were excluded to perform the sensitivity analysis

Fixed effects meta-analysis.

TABLE S9. ASSOCIATION GENETIC RISK SCORE OF AGE OF NATURAL MENOPAUSE (ANM) AND OBSERVED ANM

|          | n    | p Value | R-squared | F *   |
|----------|------|---------|-----------|-------|
| CoLaus   | 1137 | <0.001  | 0.0337    | 40.63 |
| RS-I-3   | 1603 | <0.001  | 0.0146    | 23.67 |
| RS-II-1  | 790  | 0.0009  | 0.0140    | 11.15 |
| RS-III-1 | 919  | 0.0000  | 0.0199    | 18.60 |

\* First-stage regressions

TABLE S10. ASSOCIATION OF WEIGHTED GENETIC RISK SCORE WITH BLOOD PRESSURE TRAITS BY STUDY.

| GRS-ANM                 | Model 1            |       | Model 2*           |       | Model 1                  |       | Model 2*           |       | Model 1          |       | Model 2*         |       |
|-------------------------|--------------------|-------|--------------------|-------|--------------------------|-------|--------------------|-------|------------------|-------|------------------|-------|
| Systolic blood pressure |                    |       |                    |       | Diastolic blood pressure |       |                    |       | Hypertension*    |       |                  |       |
|                         | β (95% CI)         | p     | β (95% CI)         | p     | β (95% CI)               | p     | β (95% CI)         | p     | OR (95% CI)      | p     | OR (95% CI)      | p     |
| CoLaus (n=1139)         |                    |       |                    |       |                          |       |                    |       |                  |       |                  |       |
| Cont.                   | -0.05 (-0.30;0.21) | 0.716 | -0.01 (-0.26;0.24) | 0.937 | -0.03 (-0.18;0.12)       | 0.675 | -0.01 (-0.15;0.14) | 0.919 | 0.99 (0.96;1.02) | 0.581 | 0.99 (0.96;1.03) | 0.752 |
| Q5                      |                    |       |                    |       |                          |       |                    |       |                  |       |                  |       |
| 1                       |                    | Ref   |                    |       |                          | Ref   |                    |       |                  | Ref   |                  |       |
| 2                       | 0.16 (-3.07;3.40)  | 0.922 | 0.05 (-3.09;3.19)  | 0.975 | -0.56 (-2.47;1.36)       | 0.568 | -0.60 (-2.43;1.23) | 0.521 | 1.05 (0.71;1.54) | 0.808 | 1.00 (0.67;1.50) | 0.995 |
| 3                       | 0.58 (-2.65;3.81)  | 0.726 | -0.08 (-3.22;3.07) | 0.960 | 0.58 (-1.33;2.49)        | 0.550 | 0.13 (-1.71;1.96)  | 0.892 | 1.16 (0.79;1.69) | 0.453 | 1.05 (0.70;1.57) | 0.815 |
| 4                       | -1.20 (-4.43;2.04) | 0.468 | -0.75 (-3.91;2.41) | 0.642 | -0.86 (-2.77;1.05)       | 0.377 | -0.63 (-2.47;1.21) | 0.504 | 0.88 (0.60;1.30) | 0.520 | 0.84 (0.55;1.27) | 0.399 |
| 5                       | 0.08 (-3.15;3.31)  | 0.961 | 0.24 (-2.91;3.39)  | 0.882 | -0.24 (-2.15;1.67)       | 0.806 | -0.19 (-2.02;1.65) | 0.841 | 0.97 (0.66;1.43) | 0.894 | 0.97 (0.64;1.46) | 0.875 |
| RS-I-3 (n= 1603)        |                    |       |                    |       |                          |       |                    |       |                  |       |                  |       |
| Cont.                   | -0.20 (-0.44;0.03) | 0.082 | -0.20 (-0.43;0.03) | 0.086 | -0.06 (-0.18;0.06)       | 0.338 | -0.06 (-0.18;0.06) | 0.325 | 0.99 (0.97;1.01) | 0.401 | 0.99 (0.97;1.02) | 0.639 |
| Q5                      |                    |       |                    |       |                          |       |                    |       |                  |       |                  |       |
| 1                       |                    | Ref   |                    |       |                          | Ref   |                    |       |                  | Ref   |                  |       |
| 2                       | 2.06 (-1.15;5.27)  | 0.209 | 2.00 (-1.16;5.17)  | 0.215 | 0.78 (-0.88;2.45)        | 0.357 | 0.72 (-0.93;2.37)  | 0.393 | 1.07 (0.75;1.51) | 0.715 | 1.14 (0.79;1.63) | 0.487 |
| 3                       | -1.34 (-4.52;1.83) | 0.407 | -1.26 (-4.40;1.88) | 0.431 | -0.28 (-1.93;1.37)       | 0.742 | -0.31 (-1.95;1.33) | 0.709 | 0.82 (0.59;1.15) | 0.249 | 0.84 (0.59;1.19) | 0.318 |
| 4                       | -1.30 (-4.54;1.94) | 0.432 | -1.41 (-4.62;1.79) | 0.388 | -0.95 (-2.63;0.73)       | 0.268 | -0.95 (-2.63;0.72) | 0.263 | 0.97 (0.68;1.38) | 0.873 | 0.99 (0.69;1.42) | 0.955 |
| 5                       | -2.27 (-5.45;0.92) | 0.163 | -2.21 (-5.35;0.94) | 0.169 | -0.63 (-2.28;1.02)       | 0.454 | -0.71 (-2.36;0.93) | 0.394 | 0.89 (0.64;1.25) | 0.509 | 0.95 (0.67;1.35) | 0.786 |
| RS-II-1 (n= 790)        |                    |       |                    |       |                          |       |                    |       |                  |       |                  |       |
| Cont.                   | -0.06 (-0.36;0.25) | 0.715 | -0.07 (-0.37;0.22) | 0.614 | 0.05 (-0.11;0.21)        | 0.529 | 0.03 (-0.13;0.19)  | 0.71  | 1.00 (0.97;1.04) | 0.935 | 1.00 (0.97;1.04) | 0.973 |
| Q5                      |                    |       |                    |       |                          |       |                    |       |                  |       |                  |       |
| 1                       |                    | Ref   |                    |       |                          | Ref   |                    |       |                  | Ref   |                  |       |
| 2                       | 1.11 (-3.20;5.43)  | 0.613 | 0.74 (-3.41;4.88)  | 0.727 | 1.28 (-1.00;3.56)        | 0.271 | 0.83 (-1.42;3.08)  | 0.470 | 0.91 (0.57;1.47) | 0.701 | 0.91 (0.55;1.52) | 0.725 |
| 3                       | -1.30 (-5.87;3.26) | 0.576 | -1.23 (-5.60;3.14) | 0.582 | 0.44 (-1.98;2.85)        | 0.723 | 0.18 (-2.19;2.56)  | 0.879 | 0.75 (0.46;1.25) | 0.272 | 0.73 (0.42;1.25) | 0.247 |
| 4                       | -0.42 (-4.72;3.89) | 0.850 | -1.49 (-5.63;2.65) | 0.481 | 0.53 (-1.74;2.81)        | 0.646 | -0.01 (-2.26;2.23) | 0.993 | 0.87 (0.54;1.40) | 0.553 | 0.86 (0.51;1.44) | 0.563 |
| 5                       | -0.81 (-5.20;3.58) | 0.716 | -0.78 (-4.98;3.43) | 0.717 | 0.72 (-1.61;3.04)        | 0.545 | 0.40 (-1.88;2.68)  | 0.733 | 0.98 (0.60;1.60) | 0.941 | 1.01 (0.60;1.71) | 0.960 |
| RS-III-1 (n=919)        |                    |       |                    |       |                          |       |                    |       |                  |       |                  |       |
| Cont.                   | 0.06 (-0.22;0.35)  | 0.655 | 0.05 (-0.23;0.33)  | 0.735 | 0.04 (-0.12;0.20)        | 0.617 | 0.01 (-0.14;0.17)  | 0.863 | 0.99 (0.96;1.02) | 0.655 | 0.99 (0.96;1.02) | 0.574 |

| GRS-ANM | Model 1                 |       | Model 2*           |       | Model 1                  |       | Model 2*          |       | Model 1          |       | Model 2*         |       |
|---------|-------------------------|-------|--------------------|-------|--------------------------|-------|-------------------|-------|------------------|-------|------------------|-------|
|         | Systolic blood pressure |       |                    |       | Diastolic blood pressure |       |                   |       | Hypertension*    |       |                  |       |
| Q5      |                         |       |                    |       |                          |       |                   |       |                  |       |                  |       |
| 1       | Ref                     |       |                    |       | Ref                      |       |                   |       | Ref              |       |                  |       |
| 2       | -0.43 (-4.49;3.64)      | 0.837 | -0.20 (-4.21;3.80) | 0.920 | 0.11 (-2.23;2.45)        | 0.925 | 0.52 (-1.73;2.76) | 0.651 | 0.86 (0.56;1.32) | 0.483 | 0.88 (0.55;1.39) | 0.579 |
| 3       | -2.41 (-6.37;1.55)      | 0.233 | -2.31 (-6.20;1.58) | 0.244 | 0.19 (-2.09;2.47)        | 0.870 | 0.21 (-1.97;2.39) | 0.853 | 0.76 (0.50;1.16) | 0.199 | 0.76 (0.49;1.19) | 0.228 |
| 4       | 1.55 (-2.47;5.57)       | 0.449 | 1.52 (-2.43;5.47)  | 0.451 | 2.34 (0.03;4.65)         | 0.047 | 2.29 (0.08;4.51)  | 0.042 | 1.10 (0.72;1.68) | 0.659 | 1.07 (0.68;1.68) | 0.780 |
| 5       | 0.50 (-3.57;4.57)       | 0.809 | 0.52 (-3.47;4.52)  | 0.797 | 0.65 (-1.69;2.99)        | 0.585 | 0.53 (-1.70;2.77) | 0.639 | 0.89 (0.58;1.36) | 0.582 | 0.92 (0.58;1.45) | 0.711 |

Model 1: Adjusted for age, glomerular filtration rate.

Model 2: Adjusted for age and glomerular filtration rate, body mass index, total cholesterol, drinking status, education level, smoking status, prevalent Type 2 diabetes, history of cardiovascular diseases, statin use, hormone replacement therapy, use of antihypertensive medication.

\*(n=1137) Observations

OR= Odds ratio; CI=Confidence interval; p=p value; GRS-ANM = Genetic Risk Score of Age of menopause; Cont.=Continuous; Q5=Quintiles

Reference category was lowest quintile

\* Not adjusted for antihypertensive medication

TABLE S11. ASSOCIATION OF THE GENETIC RISK SCORE WITH CONFOUNDERS BY STUDY

|                              | CoLaus                 |      |                        |      | RS-I-3                |      |                       |      | RS-II-1               |      |                       |      | RS-III-1             |      |                      |      | Meta-analysis           |                          |
|------------------------------|------------------------|------|------------------------|------|-----------------------|------|-----------------------|------|-----------------------|------|-----------------------|------|----------------------|------|----------------------|------|-------------------------|--------------------------|
|                              | Crude                  |      | Adjusted               |      | Crude                 |      | Adjusted              |      | Crude                 |      | Adjusted              |      | Crude                |      | Adjusted             |      | Crude                   | Adjusted                 |
| Variable                     | β (95% CI)             | p    | β (95% CI)             | p    | β (95% CI)            | p    | β (95% CI)            | p    | β (95% CI)            | p    | β (95% CI)            | p    | β (95% CI)           | p    | β (95% CI)           | p    | β (95% CI)              | β (95% CI)               |
| Age                          | -0.12<br>(-0.22;-0.01) | 0.03 | -0.10<br>(-0.19;-0.00) | 0.04 | 0.01<br>(-0.07;0.10)  | 0.78 | 0.03<br>(-0.04;0.10)  | 0.39 | 0.12<br>(-0.01;0.25)  | 0.07 | 0.10<br>(0.00;0.21)   | 0.05 | 0.07<br>(-0.03;0.16) | 0.18 | 0.07<br>(-0.02;0.16) | 0.11 | 0.02<br>(-0.08; 0.11)   | 0.02<br>(-0.06; 0.10)    |
| Glomerular filtration rate   | 0.08<br>(-0.12;0.28)   | 0.44 | -0.01<br>(-0.19;0.17)  | 0.92 | 0.07<br>(-0.10;0.23)  | 0.44 | 0.08<br>(-0.06;0.22)  | 0.28 | -0.04<br>(-0.28;0.19) | 0.71 | 0.08<br>(-0.11;0.27)  | 0.40 | 0.03<br>(-0.17;0.23) | 0.78 | 0.09<br>(-0.09;0.26) | 0.35 | 0.04<br>(-0.05; 0.14)   | 0.06<br>(-0.02; 0.15)    |
| Body mass index              | -0.01<br>(-0.08;0.06)  | 0.82 | -0.00<br>(-0.07;0.07)  | 0.92 | -0.04<br>(-0.09;0.01) | 0.10 | -0.04<br>(-0.09;0.01) | 0.13 | 0.03<br>(-0.04;0.09)  | 0.44 | 0.03<br>(-0.04;0.10)  | 0.37 | 0.02<br>(-0.05;0.09) | 0.50 | 0.03<br>(-0.04;0.09) | 0.47 | -0.01<br>(-0.04; 0.03)  | -0.0003<br>(-0.04; 0.04) |
| Total cholesterol            | 0.00<br>(-0.01;0.01)   | 0.93 | 0.00<br>(-0.01;0.01)   | 0.75 | 0.00<br>(-0.01;0.01)  | 0.98 | 0.00<br>(-0.01;0.01)  | 0.98 | -0.01<br>(-0.02;0.01) | 0.39 | -0.01<br>(-0.02;0.01) | 0.45 | 0.00<br>(-0.01;0.02) | 0.93 | 0.00<br>(-0.01;0.02) | 0.94 | -0.002<br>(-0.01; 0.00) | -0.002<br>(-0.02; 0.004) |
| Statin use                   | 0.95<br>(0.91;1.00)    | 0.06 | 0.97<br>(0.92;1.00)    | 0.11 | -0.02<br>(-0.06;0.01) | 0.21 | -0.02<br>(-0.06;0.01) | 0.24 | 0.00<br>(-0.05;0.04)  | 0.86 | -0.01<br>(-0.05;0.04) | 0.78 | 0.00<br>(-0.04;0.03) | 0.85 | 0.00<br>(-0.04;0.03) | 0.79 | 0.23<br>(-0.19; 0.66)   | 0.24<br>(-0.23; 0.70)    |
| *Hormone replacement therapy | 1.03<br>(1.00;1.06)    | 0.01 | 1.04<br>(1.01;1.07)    | 0.01 | 1.03<br>(0.96;1.12)   | 0.37 | 1.03<br>(0.96;1.11)   | 0.39 | 1.04<br>(0.96;1.13)   | 0.30 | 1.05<br>(0.96;1.13)   | 0.28 | 0.90<br>(0.80;1.02)  | 0.09 | 0.91<br>(0.81;1.02)  | 0.11 | 1.02<br>(0.98;1.06)     | 1.02<br>(0.98;1.07)      |
| *Antihypertensive medication | 0.98<br>(0.94;1.00)    | 0.15 | 0.98<br>(0.94;1.02)    | 0.28 | 1.00<br>(0.97;1.02)   | 0.82 | 1.00<br>(0.98;1.02)   | 0.91 | 1.01<br>(0.98;1.05)   | 0.47 | 1.01<br>(0.97;1.04)   | 0.69 | 1.01<br>(0.98;1.05)  | 0.40 | 1.01<br>(0.98;1.05)  | 0.44 | 0.10<br>(0.98;1.01)     | 1.00<br>(0.99; 1.02)     |
| *Drinking status             | 0.99<br>(0.96;1.03)    | 0.74 | 0.99<br>(0.97;1.02)    | 0.76 | 0.99<br>(0.97;1.02)   | 0.49 | 0.99<br>(0.97;1.02)   | 0.53 | 1.01<br>(0.97;1.05)   | 0.56 | 1.01<br>(0.97;1.06)   | 0.50 | 1.06<br>(0.97;1.15)  | 0.18 | 1.07<br>(0.98;1.16)  | 0.14 | 0.10<br>(0.98;1.02)     | 0.98<br>(0.98;1.02)      |
| *Diabetes mellitus, type 2   | 0.95<br>(0.88;1.02)    | 0.21 | 0.96<br>(0.89;1.02)    | 0.24 | 0.98<br>(0.95;1.01)   | 0.19 | 0.98<br>(0.94;1.01)   | 0.17 | 1.00<br>(0.95;1.05)   | 0.96 | 1.00<br>(0.95;1.05)   | 0.94 | 0.98<br>(0.93;1.04)  | 0.57 | 0.98<br>(0.92;1.04)  | 0.50 | 0.98<br>(0.92;1.00)     | 0.98<br>(0.92 ;1.01)     |
| *History of CVD              | 1.01<br>(0.96;1.07)    | 0.50 | 1.02<br>(0.97;1.08)    | 0.33 | 0.98<br>(0.94;1.01)   | 0.24 | 0.98<br>(0.94;1.01)   | 0.22 | 1.01<br>(0.94;1.08)   | 0.81 | 0.99<br>(0.92;1.07)   | 0.86 | 1.04<br>(0.95;1.14)  | 0.37 | 1.04<br>(0.95;1.13)  | 0.38 | 0.10<br>(0.97;1.02)     | 0.10<br>(0.97; 1.02)     |
| *Smoking status              | 1.03<br>(1.00;1.05)    | 0.06 | 1.02<br>(0.99;1.05)    | 0.1  | 0.96<br>(0.93;0.99)   | 0.02 | 0.96<br>(0.93;0.99)   | 0.02 | 0.97<br>(0.94;1.01)   | 0.18 | 0.98<br>(0.94;1.02)   | 0.27 | 1.01<br>(0.97;1.04)  | 0.67 | 1.01<br>(0.98;1.05)  | 0.50 | 0.99<br>(0.94;1.03)     | 0.99<br>(0.96;1.02)      |
| **Education level            | 0.99<br>(0.96;1.02)    | 0.88 | 1.00<br>(0.97;1.03)    | 0.8  | 1.00<br>(0.98;1.03)   | 0.90 | 1.00<br>(0.98;1.03)   | 0.86 | 1.03<br>(1.00;1.07)   | 0.08 | 1.03<br>(1.00;1.07)   | 0.06 | 1.00<br>(0.97;1.03)  | 0.93 | 1.00<br>(0.97;1.03)  | 0.80 | 1.00<br>(0.99; 1.02)    | 1.01<br>(0.99;1.02)      |

OR = Odds ratio; CI=Confidence interval; p=p value

\* Logistic regression, OR

\*\* Ordinal logistic regression OR

Adjusted by age, eGFR.

Statistically significant p-value (Bonferroni correction)  $\leq 0.0041$

TABLE S12. ASSOCIATION OF EACH SNP INCLUDED IN THE GENETIC RISK SCORE WITH CONFOUNDERS BY STUDY

| CoLaus (n=1141) |            |        |       |                |       |                 |       |                   |       |        |       |        |       |                                |       |                   |       |          |       |                 |       |       |       |                                 |       |
|-----------------|------------|--------|-------|----------------|-------|-----------------|-------|-------------------|-------|--------|-------|--------|-------|--------------------------------|-------|-------------------|-------|----------|-------|-----------------|-------|-------|-------|---------------------------------|-------|
|                 |            | Age    |       | Smoking status |       | Alcohol drinker |       | Educational level |       | eGFR   |       | BMI    |       | Cardiovascular disease history |       | Total cholesterol |       | Diabetes |       | Statins therapy |       | HRT   |       | Receiving BP-related medication |       |
| n               | SNP        | β      | p     | OR             | p     | OR              | p     | OR                | p     | β      | p     | β      | p     | OR                             | p     | β                 | p     | OR       | p     | OR              | p     | OR    | p     | OR                              | p     |
| 1               | rs4246511  | -0.410 | 0.224 | 1.062          | 0.529 | 0.852           | 0.112 | 1.084             | 0.406 | 0.003  | 0.997 | -0.068 | 0.773 | 0.810                          | 0.232 | -0.063            | 0.184 | 0.943    | 0.786 | 0.929           | 0.607 | 1.162 | 0.116 | 0.921                           | 0.462 |
| 2               | rs12142240 | -0.587 | 0.077 | 0.945          | 0.548 | 1.002           | 0.985 | 0.972             | 0.768 | 0.696  | 0.279 | 0.008  | 0.972 | 0.980                          | 0.908 | 0.073             | 0.114 | 1.008    | 0.972 | 0.804           | 0.14  | 0.867 | 0.132 | 0.847                           | 0.144 |
| 3               | rs1411478  | 0.267  | 0.384 | 0.923          | 0.354 | 1.085           | 0.368 | 0.939             | 0.481 | -0.620 | 0.295 | 0.136  | 0.522 | 1.129                          | 0.466 | 0.033             | 0.442 | 1.083    | 0.692 | 0.881           | 0.33  | 0.861 | 0.086 | 1.030                           | 0.776 |
| 4               | rs2236918  | 0.103  | 0.734 | 0.984          | 0.851 | 0.977           | 0.796 | 0.985             | 0.865 | 1.118  | 0.057 | -0.119 | 0.573 | 0.853                          | 0.328 | 0.089             | 0.037 | 0.773    | 0.194 | 0.919           | 0.516 | 0.926 | 0.372 | 1.094                           | 0.379 |
| 5               | rs704795   | -0.405 | 0.194 | 1.185          | 0.054 | 0.935           | 0.463 | 0.968             | 0.718 | -1.369 | 0.023 | -0.032 | 0.882 | 0.901                          | 0.539 | -0.021            | 0.638 | 1.083    | 0.694 | 1.040           | 0.767 | 1.005 | 0.957 | 0.888                           | 0.261 |
| 6               | rs1800932  | -0.146 | 0.685 | 1.009          | 0.927 | 0.868           | 0.175 | 0.948             | 0.604 | -0.613 | 0.377 | -0.110 | 0.657 | 0.714                          | 0.114 | -0.051            | 0.305 | 1.043    | 0.856 | 0.880           | 0.419 | 1.193 | 0.086 | 0.869                           | 0.254 |
| 7               | rs930036   | -0.198 | 0.499 | 0.916          | 0.286 | 1.053           | 0.551 | 1.053             | 0.544 | 0.450  | 0.426 | 0.055  | 0.785 | 1.166                          | 0.321 | 0.112             | 0.006 | 0.979    | 0.913 | 0.881           | 0.32  | 1.054 | 0.528 | 0.925                           | 0.425 |
| 8               | rs16858210 | -0.275 | 0.42  | 0.975          | 0.791 | 1.119           | 0.268 | 0.962             | 0.692 | 0.571  | 0.387 | 0.267  | 0.259 | 1.168                          | 0.384 | -0.014            | 0.77  | 1.468    | 0.067 | 1.140           | 0.359 | 0.924 | 0.411 | 1.110                           | 0.356 |
| 9               | rs4693089  | 0.519  | 0.088 | 1.114          | 0.208 | 0.986           | 0.876 | 1.089             | 0.33  | -0.837 | 0.155 | -0.056 | 0.79  | 0.859                          | 0.356 | -0.004            | 0.93  | 0.816    | 0.312 | 1.192           | 0.179 | 1.001 | 0.99  | 0.976                           | 0.811 |
| 10              | rs6856693  | 0.150  | 0.622 | 1.020          | 0.821 | 1.086           | 0.356 | 0.929             | 0.405 | 0.163  | 0.782 | 0.021  | 0.921 | 1.057                          | 0.733 | -0.021            | 0.629 | 0.791    | 0.248 | 0.819           | 0.132 | 0.964 | 0.67  | 0.920                           | 0.411 |
| 11              | rs427394   | 0.173  | 0.573 | 0.919          | 0.33  | 0.911           | 0.305 | 1.010             | 0.914 | -0.061 | 0.917 | -0.033 | 0.876 | 1.024                          | 0.885 | -0.011            | 0.805 | 0.774    | 0.215 | 0.977           | 0.86  | 0.988 | 0.89  | 1.116                           | 0.281 |
| 12              | rs11738223 | 0.448  | 0.163 | 1.153          | 0.117 | 1.038           | 0.698 | 1.044             | 0.643 | -0.194 | 0.755 | 0.293  | 0.189 | 1.120                          | 0.504 | -0.043            | 0.337 | 1.140    | 0.525 | 1.410           | 0.01  | 1.235 | 0.022 | 1.166                           | 0.149 |
| 13              | rs2241584  | -0.351 | 0.254 | 1.194          | 0.042 | 0.947           | 0.548 | 0.987             | 0.881 | -0.107 | 0.858 | -0.137 | 0.521 | 0.848                          | 0.328 | 0.096             | 0.026 | 0.897    | 0.591 | 0.896           | 0.411 | 1.057 | 0.527 | 0.965                           | 0.731 |
| 14              | rs365132   | 0.176  | 0.561 | 0.975          | 0.771 | 0.989           | 0.899 | 0.955             | 0.599 | -0.405 | 0.49  | 0.395  | 0.06  | 1.032                          | 0.846 | 0.002             | 0.961 | 1.276    | 0.221 | 1.111           | 0.42  | 0.757 | 0.001 | 1.276                           | 0.017 |
| 15              | rs6899676  | -0.445 | 0.249 | 0.959          | 0.698 | 0.974           | 0.814 | 0.918             | 0.439 | -0.307 | 0.681 | -0.499 | 0.062 | 0.702                          | 0.12  | -0.045            | 0.404 | 0.848    | 0.531 | 0.959           | 0.804 | 1.082 | 0.475 | 1.058                           | 0.661 |
| 16              | rs9393800  | -0.657 | 0.063 | 1.043          | 0.676 | 1.180           | 0.118 | 1.001             | 0.991 | 0.858  | 0.209 | 0.239  | 0.33  | 0.969                          | 0.867 | -0.008            | 0.873 | 0.774    | 0.294 | 0.768           | 0.097 | 1.103 | 0.33  | 0.792                           | 0.056 |
| 17              | rs2230365  | -0.205 | 0.622 | 0.921          | 0.482 | 0.892           | 0.346 | 1.210             | 0.121 | -0.836 | 0.299 | -0.260 | 0.366 | 0.989                          | 0.961 | 0.010             | 0.863 | 0.962    | 0.888 | 1.205           | 0.273 | 0.913 | 0.441 | 1.073                           | 0.606 |
| 18              | rs707938   | -0.622 | 0.055 | 1.069          | 0.462 | 1.002           | 0.985 | 1.129             | 0.2   | 0.483  | 0.441 | 0.358  | 0.111 | 1.142                          | 0.438 | -0.007            | 0.877 | 1.014    | 0.947 | 0.923           | 0.568 | 1.090 | 0.352 | 0.935                           | 0.539 |
| 19              | rs12196873 | -0.578 | 0.139 | 1.184          | 0.128 | 1.270           | 0.045 | 1.066             | 0.578 | 1.701  | 0.025 | -0.464 | 0.087 | 0.875                          | 0.542 | 0.032             | 0.555 | 0.997    | 0.991 | 0.788           | 0.183 | 1.114 | 0.333 | 0.795                           | 0.095 |
| 20              | rs2720044  | 1.032  | 0.114 | 0.643          | 0.018 | 0.908           | 0.616 | 0.992             | 0.967 | -1.032 | 0.414 | 0.897  | 0.047 | 0.991                          | 0.979 | 0.012             | 0.894 | 1.644    | 0.196 | 0.930           | 0.797 | 1.235 | 0.26  | 1.325                           | 0.183 |
| 21              | rs10957156 | 0.193  | 0.578 | 0.940          | 0.53  | 0.876           | 0.202 | 0.994             | 0.951 | -0.148 | 0.826 | 0.305  | 0.203 | 1.287                          | 0.204 | -0.044            | 0.365 | 0.834    | 0.402 | 0.795           | 0.108 | 0.945 | 0.569 | 0.975                           | 0.827 |
| 22              | rs4879656  | 0.039  | 0.899 | 0.975          | 0.768 | 0.964           | 0.683 | 1.155             | 0.107 | -0.145 | 0.807 | 0.096  | 0.651 | 1.041                          | 0.806 | 0.040             | 0.356 | 0.766    | 0.198 | 0.862           | 0.264 | 1.072 | 0.429 | 1.051                           | 0.627 |
| 23              | rs10905065 | -0.045 | 0.883 | 0.976          | 0.773 | 1.098           | 0.294 | 0.934             | 0.432 | 0.117  | 0.841 | -0.238 | 0.256 | 0.985                          | 0.923 | 0.064             | 0.129 | 0.843    | 0.381 | 1.138           | 0.322 | 1.153 | 0.096 | 0.867                           | 0.154 |
| 24              | rs11031006 | 0.284  | 0.491 | 0.921          | 0.481 | 1.230           | 0.098 | 1.097             | 0.449 | -0.688 | 0.389 | 0.056  | 0.845 | 1.271                          | 0.248 | -0.029            | 0.618 | 1.390    | 0.178 | 0.856           | 0.401 | 1.045 | 0.705 | 0.943                           | 0.673 |
| 25              | rs6484478  | -0.359 | 0.33  | 1.099          | 0.365 | 0.906           | 0.371 | 1.096             | 0.387 | -0.116 | 0.871 | -0.111 | 0.664 | 0.957                          | 0.823 | 0.016             | 0.759 | 0.908    | 0.681 | 0.740           | 0.043 | 1.074 | 0.496 | 0.965                           | 0.772 |
| 26              | rs10734411 | 0.249  | 0.405 | 1.117          | 0.188 | 1.032           | 0.718 | 0.970             | 0.728 | 0.790  | 0.172 | 0.132  | 0.524 | 1.006                          | 0.971 | -0.130            | 0.002 | 1.068    | 0.734 | 1.228           | 0.107 | 1.112 | 0.214 | 1.091                           | 0.384 |
| 27              | rs2277339  | 0.321  | 0.601 | 1.386          | 0.062 | 1.048           | 0.797 | 1.367             | 0.089 | 1.405  | 0.238 | -0.063 | 0.883 | 0.803                          | 0.532 | 0.030             | 0.731 | 0.858    | 0.715 | 0.828           | 0.495 | 0.780 | 0.154 | 0.696                           | 0.1   |
| 28              | rs3741604  | -0.197 | 0.511 | 0.842          | 0.043 | 1.017           | 0.851 | 1.174             | 0.063 | 0.328  | 0.572 | 0.188  | 0.365 | 0.683                          | 0.018 | -0.008            | 0.846 | 0.983    | 0.931 | 0.860           | 0.237 | 1.005 | 0.955 | 1.038                           | 0.71  |
| 29              | rs1183272  | -0.099 | 0.742 | 1.162          | 0.079 | 1.001           | 0.987 | 0.855             | 0.072 | -0.488 | 0.403 | -0.293 | 0.161 | 1.571                          | 0.005 | 0.000             | 0.995 | 0.872    | 0.491 | 1.085           | 0.529 | 1.013 | 0.878 | 0.907                           | 0.333 |
| 30              | rs7397861  | -0.241 | 0.438 | 0.950          | 0.561 | 1.001           | 0.991 | 0.946             | 0.539 | 0.193  | 0.748 | -0.285 | 0.186 | 0.840                          | 0.29  | -0.099            | 0.023 | 1.039    | 0.852 | 0.986           | 0.916 | 1.045 | 0.62  | 1.032                           | 0.766 |
| 31              | rs551087   | -0.119 | 0.731 | 1.218          | 0.045 | 1.128           | 0.237 | 1.034             | 0.739 | -0.456 | 0.497 | 0.344  | 0.152 | 0.906                          | 0.592 | 0.061             | 0.211 | 1.197    | 0.443 | 1.186           | 0.264 | 1.119 | 0.255 | 0.890                           | 0.31  |
| 32              | rs1727326  | -0.327 | 0.49  | 1.017          | 0.897 | 0.997           | 0.983 | 1.057             | 0.686 | 0.408  | 0.657 | -0.347 | 0.29  | 0.777                          | 0.292 | 0.103             | 0.12  | 0.780    | 0.391 | 0.968           | 0.87  | 1.112 | 0.431 | 0.915                           | 0.57  |
| 33              | rs12824058 | -0.501 | 0.098 | 1.146          | 0.111 | 0.938           | 0.471 | 0.862             | 0.089 | 0.073  | 0.901 | -0.144 | 0.493 | 0.995                          | 0.975 | -0.024            | 0.577 | 1.084    | 0.683 | 0.844           | 0.196 | 1.037 | 0.67  | 0.913                           | 0.372 |
| 34              | rs4886238  | 0.249  | 0.431 | 1.061          | 0.504 | 1.098           | 0.318 | 1.076             | 0.427 | -0.467 | 0.445 | -0.216 | 0.324 | 0.850                          | 0.35  | -0.033            | 0.455 | 0.696    | 0.099 | 0.983           | 0.897 | 0.902 | 0.251 | 0.918                           | 0.425 |
| 35              | rs1713460  | 0.077  | 0.849 | 0.940          | 0.591 | 0.890           | 0.328 | 1.200             | 0.124 | 0.363  | 0.644 | -0.017 | 0.951 | 1.090                          | 0.69  | -0.005            | 0.928 | 1.629    | 0.049 | 0.841           | 0.331 | 0.834 | 0.114 | 1.029                           | 0.833 |
| 36              | rs9796     | -0.261 | 0.382 | 1.156          | 0.085 | 0.987           | 0.879 | 0.950             | 0.549 | -0.418 | 0.47  | -0.170 | 0.412 | 1.300                          | 0.103 | 0.072             | 0.083 | 0.893    | 0.565 | 1.160           | 0.248 | 0.875 | 0.117 | 1.036                           | 0.72  |
| 37              | rs1054875  | 0.135  | 0.667 | 1.239          | 0.016 | 0.938           | 0.489 | 0.951             | 0.579 | -0.721 | 0.235 | 0.000  | 0.999 | 1.327                          | 0.087 | -0.054            | 0.216 | 0.871    | 0.505 | 1.026           | 0.85  | 1.009 | 0.918 | 1.039                           | 0.713 |
| 38              | rs9039     | 0.139  | 0.695 | 0.756          | 0.005 | 0.995           | 0.958 | 0.984             | 0.877 | -0.330 | 0.629 | -0.025 | 0.919 | 0.717                          | 0.106 | -0.068            | 0.167 | 0.996    | 0.987 | 0.919           | 0.582 | 1.247 | 0.03  | 0.909                           | 0.427 |
| 39              | rs10852344 | -0.049 | 0.872 | 0.967          | 0.701 | 0.987           | 0.883 | 1.100             | 0.284 | -0.320 | 0.588 | 0.053  | 0.803 | 0.827                          | 0.243 | -0.019            |       |          |       |                 |       |       |       |                                 |       |



| RI (n=1,603) |            |        |       |                |       |                 |       |                   |       |        |       |        |       |                                |       |                   |       |          |       |                 |       |       |       |                                 |       |
|--------------|------------|--------|-------|----------------|-------|-----------------|-------|-------------------|-------|--------|-------|--------|-------|--------------------------------|-------|-------------------|-------|----------|-------|-----------------|-------|-------|-------|---------------------------------|-------|
| Age          |            |        |       | Smoking status |       | Alcohol drinker |       | Educat bnal level |       | eGFR   |       | BMI    |       | Cardiovascular disease history |       | Total cholesterol |       | Diabetes |       | Stat hs therapy |       | HRT   |       | Receiving BP-related medicat on |       |
| n            | SNP        | β      | p     | OR             | p     | OR              | p     | OR                | p     | β      | p     | β      | p     | OR                             | p     | β                 | p     | OR       | p     | OR              | p     | OR    | p     | OR                              | p     |
| 1            | rs4246511  | -0.061 | 0.839 | 0.736          | 0.005 | 1.001           | 0.992 | 1.235             | 0.017 | -0.150 | 0.804 | 0.033  | 0.854 | 0.994                          | 0.962 | 0.020             | 0.617 | 1.076    | 0.558 | 0.920           | 0.494 | 1.248 | 0.428 | 0.975                           | 0.76  |
| 2            | rs12142240 | -0.083 | 0.775 | 0.981          | 0.861 | 1.044           | 0.633 | 0.940             | 0.458 | -0.478 | 0.402 | -0.016 | 0.93  | 1.034                          | 0.789 | -0.007            | 0.847 | 1.269    | 0.058 | 0.924           | 0.514 | 1.672 | 0.074 | 0.895                           | 0.161 |
| 3            | rs1411478  | -0.389 | 0.156 | 1.333          | 0.006 | 1.244           | 0.009 | 1.149             | 0.082 | 0.074  | 0.891 | -0.059 | 0.721 | 1.156                          | 0.221 | 0.001             | 0.968 | 0.948    | 0.631 | 1.138           | 0.274 | 1.441 | 0.153 | 0.970                           | 0.684 |
| 4            | rs2236918  | 0.068  | 0.805 | 1.242          | 0.04  | 1.174           | 0.061 | 1.077             | 0.357 | 0.156  | 0.783 | 0.017  | 0.916 | 1.087                          | 0.482 | 0.052             | 0.138 | 0.898    | 0.342 | 0.921           | 0.463 | 0.889 | 0.64  | 0.884                           | 0.104 |
| 5            | rs704795   | 0.452  | 0.1   | 0.964          | 0.725 | 0.859           | 0.075 | 0.947             | 0.496 | -0.419 | 0.438 | 0.135  | 0.401 | 1.077                          | 0.525 | 0.000             | 0.997 | 1.108    | 0.363 | 0.811           | 0.06  | 1.086 | 0.742 | 1.176                           | 0.031 |
| 6            | rs1800932  | 0.024  | 0.943 | 1.173          | 0.209 | 1.017           | 0.87  | 1.005             | 0.962 | -0.213 | 0.741 | 0.019  | 0.923 | 0.901                          | 0.45  | 0.037             | 0.399 | 0.810    | 0.12  | 1.024           | 0.862 | 1.992 | 0.072 | 1.038                           | 0.679 |
| 7            | rs930036   | -0.098 | 0.725 | 1.027          | 0.794 | 1.097           | 0.275 | 0.902             | 0.195 | 1.054  | 0.058 | -0.039 | 0.81  | 0.812                          | 0.073 | -0.003            | 0.934 | 0.946    | 0.613 | 0.915           | 0.426 | 1.188 | 0.501 | 0.978                           | 0.774 |
| 8            | rs16858210 | 0.011  | 0.973 | 1.077          | 0.534 | 1.194           | 0.063 | 0.962             | 0.672 | 0.445  | 0.475 | -0.024 | 0.895 | 1.049                          | 0.723 | -0.020            | 0.624 | 1.189    | 0.191 | 1.207           | 0.174 | 1.536 | 0.18  | 1.075                           | 0.406 |
| 9            | rs4693089  | 0.042  | 0.874 | 1.140          | 0.182 | 1.035           | 0.679 | 1.064             | 0.419 | 0.372  | 0.472 | 0.202  | 0.196 | 0.993                          | 0.949 | 0.017             | 0.632 | 1.199    | 0.087 | 1.132           | 0.277 | 1.156 | 0.539 | 0.926                           | 0.285 |
| 10           | rs6856693  | 0.519  | 0.066 | 0.947          | 0.602 | 0.923           | 0.35  | 0.857             | 0.059 | -1.071 | 0.054 | -0.204 | 0.225 | 1.261                          | 0.049 | 0.002             | 0.965 | 1.110    | 0.376 | 1.125           | 0.301 | 1.053 | 0.841 | 1.036                           | 0.645 |
| 11           | rs427394   | -0.017 | 0.948 | 1.196          | 0.084 | 0.981           | 0.818 | 1.061             | 0.448 | -0.057 | 0.914 | -0.327 | 0.036 | 1.066                          | 0.575 | -0.014            | 0.692 | 0.903    | 0.356 | 0.957           | 0.686 | 0.833 | 0.439 | 0.958                           | 0.555 |
| 12           | rs11738223 | -0.354 | 0.216 | 0.952          | 0.647 | 0.940           | 0.482 | 1.015             | 0.855 | 1.013  | 0.072 | 0.151  | 0.37  | 0.869                          | 0.244 | 0.067             | 0.065 | 1.129    | 0.307 | 1.051           | 0.682 | 1.711 | 0.064 | 0.937                           | 0.402 |
| 13           | rs2241584  | -0.373 | 0.174 | 0.989          | 0.912 | 1.026           | 0.759 | 0.953             | 0.542 | 1.517  | 0.006 | -0.266 | 0.097 | 0.968                          | 0.781 | 0.033             | 0.37  | 0.860    | 0.173 | 0.868           | 0.232 | 1.147 | 0.582 | 0.921                           | 0.267 |
| 14           | rs365132   | -0.313 | 0.245 | 1.035          | 0.729 | 1.109           | 0.21  | 0.960             | 0.6   | 0.201  | 0.702 | 0.197  | 0.21  | 1.076                          | 0.519 | 0.003             | 0.922 | 1.127    | 0.308 | 1.088           | 0.439 | 0.833 | 0.447 | 1.016                           | 0.823 |
| 15           | rs6899676  | 0.295  | 0.362 | 1.015          | 0.902 | 1.057           | 0.569 | 0.932             | 0.448 | -0.955 | 0.138 | -0.039 | 0.842 | 1.190                          | 0.225 | 0.054             | 0.201 | 0.860    | 0.232 | 0.990           | 0.942 | 0.992 | 0.979 | 0.931                           | 0.417 |
| 16           | rs9393800  | -0.117 | 0.703 | 0.960          | 0.717 | 1.136           | 0.169 | 1.093             | 0.319 | 1.333  | 0.03  | -0.057 | 0.751 | 0.768                          | 0.036 | 0.032             | 0.417 | 0.863    | 0.245 | 1.161           | 0.242 | 1.961 | 0.042 | 0.896                           | 0.187 |
| 17           | rs2230365  | -0.011 | 0.976 | 1.163          | 0.299 | 1.009           | 0.937 | 0.991             | 0.932 | -1.393 | 0.073 | 0.357  | 0.112 | 1.511                          | 0.023 | -0.056            | 0.254 | 1.055    | 0.741 | 1.196           | 0.268 | 1.210 | 0.597 | 1.250                           | 0.034 |
| 18           | rs707938   | -0.035 | 0.904 | 0.920          | 0.44  | 0.974           | 0.767 | 0.839             | 0.037 | 1.038  | 0.078 | -0.098 | 0.568 | 0.814                          | 0.091 | 0.057             | 0.125 | 0.929    | 0.536 | 1.083           | 0.507 | 1.704 | 0.071 | 0.938                           | 0.421 |
| 19           | rs12196873 | 0.759  | 0.058 | 1.059          | 0.707 | 0.888           | 0.351 | 0.961             | 0.732 | -0.530 | 0.507 | 0.445  | 0.059 | 1.140                          | 0.457 | -0.056            | 0.288 | 1.144    | 0.433 | 1.017           | 0.921 | 1.097 | 0.8   | 1.088                           | 0.442 |
| 20           | rs2720044  | -0.004 | 0.993 | 0.912          | 0.551 | 0.997           | 0.982 | 0.918             | 0.474 | 0.602  | 0.507 | -0.291 | 0.234 | 1.254                          | 0.23  | -0.023            | 0.667 | 0.986    | 0.934 | 1.092           | 0.619 | 1.849 | 0.199 | 0.902                           | 0.365 |
| 21           | rs10957156 | -0.092 | 0.767 | 0.904          | 0.376 | 0.934           | 0.477 | 1.095             | 0.315 | 0.121  | 0.842 | -0.257 | 0.158 | 1.024                          | 0.859 | 0.001             | 0.98  | 1.033    | 0.809 | 1.048           | 0.713 | 0.894 | 0.692 | 0.900                           | 0.211 |
| 22           | rs4879656  | 0.071  | 0.798 | 1.008          | 0.935 | 0.963           | 0.655 | 0.833             | 0.023 | 0.242  | 0.678 | 0.103  | 0.528 | 1.066                          | 0.586 | -0.015            | 0.681 | 1.110    | 0.356 | 1.055           | 0.644 | 1.206 | 0.461 | 1.009                           | 0.901 |
| 23           | rs10905065 | 0.181  | 0.507 | 0.969          | 0.753 | 1.072           | 0.408 | 0.999             | 0.988 | -0.240 | 0.653 | 0.235  | 0.143 | 0.946                          | 0.631 | -0.006            | 0.856 | 1.048    | 0.675 | 0.975           | 0.823 | 0.933 | 0.78  | 1.072                           | 0.347 |
| 24           | rs11031006 | 0.146  | 0.68  | 1.303          | 0.059 | 0.883           | 0.261 | 1.061             | 0.564 | 1.015  | 0.161 | 0.092  | 0.661 | 0.793                          | 0.102 | 0.027             | 0.554 | 1.261    | 0.14  | 0.785           | 0.082 | 1.186 | 0.63  | 1.005                           | 0.96  |
| 25           | rs6484478  | 0.047  | 0.886 | 1.003          | 0.983 | 0.947           | 0.601 | 1.066             | 0.504 | -1.056 | 0.101 | 0.151  | 0.427 | 0.979                          | 0.88  | 0.028             | 0.522 | 0.827    | 0.136 | 0.879           | 0.319 | 0.608 | 0.062 | 1.046                           | 0.613 |
| 26           | rs10734411 | 0.220  | 0.416 | 0.916          | 0.387 | 0.899           | 0.199 | 0.921             | 0.291 | -0.829 | 0.12  | 0.077  | 0.626 | 1.065                          | 0.583 | 0.047             | 0.19  | 0.983    | 0.882 | 1.189           | 0.126 | 1.350 | 0.222 | 0.895                           | 0.135 |
| 27           | rs2277339  | 0.036  | 0.937 | 1.166          | 0.396 | 0.908           | 0.503 | 1.211             | 0.169 | -0.539 | 0.557 | -0.079 | 0.773 | 0.855                          | 0.405 | -0.091            | 0.13  | 1.159    | 0.45  | 1.222           | 0.323 | 1.444 | 0.438 | 0.952                           | 0.696 |
| 28           | rs3741604  | -0.072 | 0.786 | 1.010          | 0.917 | 0.962           | 0.635 | 0.988             | 0.872 | -0.615 | 0.243 | 0.065  | 0.679 | 0.866                          | 0.21  | -0.014            | 0.676 | 0.941    | 0.585 | 0.953           | 0.675 | 1.514 | 0.093 | 0.997                           | 0.966 |
| 29           | rs1183272  | -0.215 | 0.42  | 0.922          | 0.415 | 0.993           | 0.931 | 1.001             | 0.985 | -0.321 | 0.553 | -0.054 | 0.732 | 0.922                          | 0.476 | 0.012             | 0.732 | 1.006    | 0.959 | 0.969           | 0.782 | 1.491 | 0.121 | 1.032                           | 0.669 |
| 30           | rs7397861  | 0.593  | 0.033 | 0.878          | 0.222 | 0.969           | 0.716 | 0.941             | 0.452 | -0.793 | 0.152 | -0.060 | 0.709 | 1.009                          | 0.939 | 0.017             | 0.641 | 1.016    | 0.887 | 0.955           | 0.692 | 0.784 | 0.355 | 1.019                           | 0.802 |
| 31           | rs551087   | -0.159 | 0.592 | 0.988          | 0.915 | 1.059           | 0.522 | 0.982             | 0.835 | -0.112 | 0.849 | -0.138 | 0.428 | 0.867                          | 0.247 | 0.040             | 0.295 | 0.960    | 0.73  | 0.974           | 0.83  | 1.214 | 0.489 | 0.906                           | 0.223 |
| 32           | rs1727326  | -0.294 | 0.498 | 1.095          | 0.582 | 1.009           | 0.948 | 0.971             | 0.815 | -0.298 | 0.725 | 0.336  | 0.182 | 1.411                          | 0.088 | -0.042            | 0.443 | 0.996    | 0.984 | 1.236           | 0.266 | 1.200 | 0.657 | 0.962                           | 0.742 |
| 33           | rs12824058 | -0.064 | 0.816 | 1.004          | 0.971 | 0.881           | 0.135 | 0.940             | 0.436 | -0.315 | 0.559 | 0.057  | 0.721 | 0.944                          | 0.622 | -0.017            | 0.648 | 0.981    | 0.868 | 0.845           | 0.131 | 0.988 | 0.963 | 0.992                           | 0.916 |
| 34           | rs4886238  | 0.004  | 0.988 | 1.033          | 0.765 | 0.921           | 0.357 | 1.025             | 0.774 | 0.150  | 0.796 | -0.041 | 0.809 | 1.087                          | 0.503 | -0.024            | 0.534 | 0.965    | 0.766 | 1.130           | 0.365 | 0.806 | 0.394 | 1.105                           | 0.209 |
| 35           | rs1713460  | 0.123  | 0.669 | 0.920          | 0.432 | 0.934           | 0.447 | 1.004             | 0.964 | -0.003 | 0.996 | -0.050 | 0.766 | 0.964                          | 0.76  | -0.031            | 0.408 | 1.214    | 0.113 | 1.181           | 0.168 | 1.241 | 0.425 | 1.008                           | 0.921 |
| 36           | rs9796     | 0.227  | 0.412 | 1.143          | 0.192 | 1.015           | 0.863 | 0.916             | 0.271 | 0.434  | 0.424 | -0.180 | 0.263 | 0.913                          | 0.435 | 0.060             | 0.089 | 0.886    | 0.292 | 0.842           | 0.137 | 1.166 | 0.55  | 0.937                           | 0.384 |
| 37           | rs1054875  | 0.012  | 0.964 | 1.111          | 0.316 | 1.067           | 0.441 | 0.895             | 0.158 | -0.258 | 0     |        |       |                                |       |                   |       |          |       |                 |       |       |       |                                 |       |

| RII (n=790) |            |        |       |                |       |                 |       |                   |       |        |       |        |       |                                |       |                   |       |          |       |                 |       |       |       |                                 |       |
|-------------|------------|--------|-------|----------------|-------|-----------------|-------|-------------------|-------|--------|-------|--------|-------|--------------------------------|-------|-------------------|-------|----------|-------|-----------------|-------|-------|-------|---------------------------------|-------|
| Age         |            |        |       | Smoking status |       | Alcohol drinker |       | Educat bnal level |       | eGFR   |       | BMI    |       | Cardiovascular disease history |       | Total cholesterol |       | Diabetes |       | Stat hs therapy |       | HRT   |       | Receiving BP-related medicat bn |       |
| n           | SNP        | β      | p     | OR             | p     | OR              | p     | OR                | p     | β      | p     | β      | p     | OR                             | p     | β                 | p     | OR       | p     | OR              | p     | OR    | p     | OR                              | p     |
| 1           | rs4246511  | 0.048  | 0.918 | 1.018          | 0.901 | 1.067           | 0.604 | 1.171             | 0.196 | 0.898  | 0.284 | -0.136 | 0.568 | 0.813                          | 0.401 | -0.020            | 0.702 | 1.325    | 0.151 | 1.312           | 0.133 | 0.850 | 0.558 | 1.062                           | 0.628 |
| 2           | rs12142240 | -0.089 | 0.845 | 1.060          | 0.679 | 1.046           | 0.754 | 0.944             | 0.622 | -0.391 | 0.636 | 0.625  | 0.008 | 0.847                          | 0.503 | 0.042             | 0.421 | 1.110    | 0.573 | 1.122           | 0.501 | 0.957 | 0.876 | 1.093                           | 0.465 |
| 3           | rs1411478  | -0.147 | 0.732 | 1.018          | 0.893 | 0.977           | 0.877 | 1.024             | 0.829 | -0.056 | 0.942 | -0.124 | 0.572 | 0.775                          | 0.271 | -0.019            | 0.692 | 0.878    | 0.443 | 1.099           | 0.554 | 0.777 | 0.332 | 0.944                           | 0.612 |
| 4           | rs2236918  | -0.419 | 0.339 | 0.846          | 0.212 | 1.221           | 0.152 | 1.136             | 0.263 | 0.659  | 0.412 | -0.115 | 0.609 | 0.755                          | 0.242 | 0.076             | 0.125 | 0.993    | 0.969 | 1.037           | 0.821 | 1.009 | 0.974 | 0.837                           | 0.124 |
| 5           | rs704795   | 0.199  | 0.642 | 1.011          | 0.933 | 0.887           | 0.34  | 0.983             | 0.874 | -0.114 | 0.885 | 0.215  | 0.326 | 1.720                          | 0.032 | 0.011             | 0.814 | 0.887    | 0.475 | 0.998           | 0.991 | 1.424 | 0.199 | 1.309                           | 0.019 |
| 6           | rs1800932  | -0.112 | 0.832 | 1.089          | 0.606 | 1.070           | 0.668 | 1.223             | 0.155 | -0.336 | 0.726 | -0.263 | 0.33  | 0.865                          | 0.598 | -0.070            | 0.245 | 1.193    | 0.422 | 1.109           | 0.605 | 1.389 | 0.363 | 0.957                           | 0.75  |
| 7           | rs930036   | 0.684  | 0.116 | 0.741          | 0.023 | 1.033           | 0.806 | 1.022             | 0.846 | -0.423 | 0.588 | -0.132 | 0.553 | 1.117                          | 0.645 | 0.030             | 0.548 | 0.889    | 0.49  | 1.005           | 0.974 | 0.716 | 0.198 | 1.065                           | 0.584 |
| 8           | rs16858210 | -0.469 | 0.335 | 0.878          | 0.372 | 1.045           | 0.728 | 1.014             | 0.913 | 0.734  | 0.399 | -0.050 | 0.842 | 0.863                          | 0.564 | 0.011             | 0.84  | 0.770    | 0.155 | 0.928           | 0.669 | 1.525 | 0.209 | 1.085                           | 0.529 |
| 9           | rs4693089  | -0.426 | 0.333 | 1.016          | 0.909 | 0.831           | 0.165 | 0.968             | 0.772 | 0.591  | 0.462 | -0.174 | 0.442 | 1.102                          | 0.686 | -0.059            | 0.24  | 0.884    | 0.483 | 0.881           | 0.436 | 0.957 | 0.869 | 1.308                           | 0.022 |
| 10          | rs6856693  | 0.217  | 0.63  | 0.808          | 0.127 | 0.894           | 0.455 | 1.196             | 0.121 | -0.015 | 0.986 | -0.350 | 0.127 | 0.658                          | 0.102 | -0.034            | 0.507 | 1.075    | 0.682 | 1.026           | 0.878 | 0.768 | 0.35  | 0.965                           | 0.764 |
| 11          | rs427394   | -0.049 | 0.909 | 1.043          | 0.748 | 0.950           | 0.725 | 1.054             | 0.635 | -0.354 | 0.646 | -0.349 | 0.111 | 0.785                          | 0.293 | -0.010            | 0.842 | 0.744    | 0.077 | 1.038           | 0.812 | 1.499 | 0.147 | 0.951                           | 0.655 |
| 12          | rs11738223 | 0.048  | 0.919 | 1.330          | 0.056 | 0.845           | 0.274 | 0.934             | 0.568 | -0.238 | 0.78  | 0.337  | 0.164 | 1.109                          | 0.692 | 0.099             | 0.065 | 1.164    | 0.427 | 0.816           | 0.237 | 0.934 | 0.813 | 1.002                           | 0.985 |
| 13          | rs2241584  | 0.625  | 0.176 | 1.195          | 0.214 | 0.875           | 0.331 | 1.084             | 0.5   | -0.222 | 0.789 | -0.131 | 0.583 | 1.306                          | 0.303 | -0.099            | 0.059 | 1.014    | 0.941 | 0.900           | 0.53  | 0.762 | 0.326 | 1.018                           | 0.883 |
| 14          | rs365132   | -0.436 | 0.311 | 1.243          | 0.099 | 0.835           | 0.127 | 0.948             | 0.627 | 0.839  | 0.283 | -0.087 | 0.691 | 1.198                          | 0.444 | 0.062             | 0.209 | 0.879    | 0.453 | 0.893           | 0.474 | 1.215 | 0.46  | 0.928                           | 0.508 |
| 15          | rs6899676  | -0.464 | 0.348 | 1.587          | 0.006 | 0.991           | 0.952 | 0.816             | 0.1   | -0.341 | 0.7   | 0.296  | 0.24  | 0.786                          | 0.339 | -0.016            | 0.781 | 1.111    | 0.601 | 1.181           | 0.38  | 1.000 | 1     | 0.989                           | 0.932 |
| 16          | rs9393800  | -0.318 | 0.509 | 1.200          | 0.229 | 1.095           | 0.571 | 1.257             | 0.072 | 0.700  | 0.418 | -0.057 | 0.818 | 1.428                          | 0.214 | 0.083             | 0.128 | 0.978    | 0.906 | 0.888           | 0.494 | 1.895 | 0.071 | 1.011                           | 0.931 |
| 17          | rs2230365  | 0.375  | 0.515 | 0.837          | 0.294 | 1.016           | 0.937 | 1.039             | 0.795 | -0.941 | 0.361 | -0.319 | 0.278 | 1.601                          | 0.209 | -0.023            | 0.722 | 1.060    | 0.803 | 1.317           | 0.232 | 0.936 | 0.847 | 1.266                           | 0.137 |
| 18          | rs707938   | 0.559  | 0.214 | 1.181          | 0.232 | 1.002           | 0.991 | 1.041             | 0.724 | -1.362 | 0.094 | 0.162  | 0.483 | 0.941                          | 0.8   | 0.028             | 0.587 | 0.810    | 0.229 | 0.980           | 0.902 | 0.999 | 0.998 | 0.989                           | 0.925 |
| 19          | rs12196873 | 0.129  | 0.843 | 1.188          | 0.406 | 0.937           | 0.815 | 0.918             | 0.605 | -1.073 | 0.36  | 0.128  | 0.702 | 1.090                          | 0.812 | 0.028             | 0.706 | 1.255    | 0.412 | 1.151           | 0.572 | 1.629 | 0.303 | 1.216                           | 0.271 |
| 20          | rs2720044  | -0.032 | 0.963 | 0.688          | 0.059 | 0.984           | 0.931 | 1.004             | 0.982 | -0.717 | 0.56  | 0.166  | 0.634 | 1.333                          | 0.467 | -0.018            | 0.818 | 0.914    | 0.736 | 1.010           | 0.968 | 0.737 | 0.437 | 0.991                           | 0.958 |
| 21          | rs10957156 | 0.915  | 0.065 | 0.890          | 0.433 | 0.984           | 0.905 | 0.881             | 0.314 | -2.263 | 0.012 | 0.155  | 0.542 | 1.751                          | 0.084 | -0.047            | 0.41  | 1.055    | 0.788 | 0.806           | 0.215 | 0.896 | 0.709 | 1.114                           | 0.415 |
| 22          | rs4879656  | 0.268  | 0.537 | 1.285          | 0.065 | 0.969           | 0.843 | 1.056             | 0.628 | 0.073  | 0.926 | 0.143  | 0.52  | 1.011                          | 0.962 | -0.042            | 0.395 | 1.055    | 0.757 | 1.281           | 0.13  | 1.365 | 0.261 | 1.051                           | 0.665 |
| 23          | rs10905065 | 0.381  | 0.366 | 0.940          | 0.634 | 0.995           | 0.967 | 1.214             | 0.071 | -0.689 | 0.361 | -0.374 | 0.084 | 0.817                          | 0.392 | -0.033            | 0.487 | 0.756    | 0.108 | 0.847           | 0.295 | 0.935 | 0.796 | 0.931                           | 0.524 |
| 24          | rs11031006 | 0.009  | 0.986 | 1.790          | 0.003 | 0.940           | 0.68  | 1.076             | 0.611 | -0.514 | 0.606 | -0.050 | 0.86  | 1.601                          | 0.186 | -0.071            | 0.257 | 1.240    | 0.357 | 1.106           | 0.631 | 0.964 | 0.912 | 1.040                           | 0.792 |
| 25          | rs6484478  | -0.037 | 0.943 | 0.724          | 0.032 | 1.067           | 0.656 | 1.100             | 0.477 | -0.269 | 0.77  | 0.171  | 0.516 | 0.888                          | 0.66  | -0.061            | 0.298 | 0.804    | 0.263 | 1.255           | 0.254 | 0.957 | 0.888 | 0.941                           | 0.652 |
| 26          | rs10734411 | -0.093 | 0.835 | 1.031          | 0.824 | 1.009           | 0.949 | 0.956             | 0.701 | -0.414 | 0.609 | -0.052 | 0.822 | 0.983                          | 0.944 | -0.051            | 0.31  | 0.960    | 0.818 | 1.020           | 0.905 | 0.716 | 0.231 | 0.858                           | 0.196 |
| 27          | rs2277339  | 0.449  | 0.535 | 1.052          | 0.82  | 0.831           | 0.527 | 1.024             | 0.898 | -1.487 | 0.251 | -0.109 | 0.769 | 0.755                          | 0.432 | -0.039            | 0.636 | 1.540    | 0.19  | 0.906           | 0.703 | 2.257 | 0.178 | 1.061                           | 0.757 |
| 28          | rs3741604  | 0.172  | 0.688 | 1.069          | 0.609 | 1.043           | 0.715 | 1.165             | 0.169 | 0.850  | 0.269 | -0.006 | 0.978 | 0.752                          | 0.23  | -0.036            | 0.462 | 0.651    | 0.013 | 0.931           | 0.651 | 1.277 | 0.353 | 0.984                           | 0.883 |
| 29          | rs1183272  | -0.248 | 0.555 | 1.175          | 0.209 | 1.033           | 0.82  | 1.030             | 0.788 | 0.670  | 0.375 | 0.166  | 0.44  | 0.854                          | 0.498 | -0.024            | 0.617 | 0.847    | 0.323 | 1.098           | 0.543 | 1.465 | 0.14  | 1.008                           | 0.942 |
| 30          | rs7397861  | 0.638  | 0.157 | 0.985          | 0.911 | 1.057           | 0.696 | 1.064             | 0.591 | -1.094 | 0.182 | 0.092  | 0.691 | 1.023                          | 0.926 | -0.067            | 0.191 | 0.940    | 0.732 | 1.277           | 0.134 | 1.021 | 0.939 | 1.129                           | 0.303 |
| 31          | rs551087   | -0.408 | 0.399 | 1.150          | 0.354 | 0.940           | 0.693 | 0.959             | 0.733 | 0.274  | 0.752 | 0.061  | 0.806 | 1.578                          | 0.113 | -0.041            | 0.458 | 0.952    | 0.796 | 1.270           | 0.195 | 1.791 | 0.083 | 1.218                           | 0.13  |
| 32          | rs1727326  | 0.210  | 0.759 | 1.256          | 0.298 | 1.035           | 0.862 | 1.163             | 0.402 | -2.726 | 0.027 | 0.622  | 0.075 | 1.744                          | 0.202 | 0.044             | 0.573 | 0.748    | 0.253 | 0.883           | 0.611 | 0.524 | 0.073 | 1.178                           | 0.374 |
| 33          | rs12824058 | 0.212  | 0.633 | 0.824          | 0.15  | 1.002           | 0.992 | 0.896             | 0.337 | -0.089 | 0.911 | 0.288  | 0.206 | 1.354                          | 0.226 | -0.048            | 0.337 | 0.836    | 0.306 | 1.194           | 0.284 | 1.194 | 0.521 | 1.043                           | 0.719 |
| 34          | rs4886238  | -0.092 | 0.838 | 0.861          | 0.274 | 0.917           | 0.515 | 0.994             | 0.958 | -0.232 | 0.778 | -0.521 | 0.024 | 0.760                          | 0.245 | 0.011             | 0.833 | 0.909    | 0.59  | 0.924           | 0.63  | 1.972 | 0.038 | 1.072                           | 0.562 |
| 35          | rs1713460  | -0.371 | 0.408 | 0.824          | 0.15  | 1.006           | 0.967 | 0.932             | 0.541 | 0.199  | 0.807 | -0.393 | 0.087 | 0.756                          | 0.23  | 0.024             | 0.633 | 0.731    | 0.068 | 0.878           | 0.424 | 1.124 | 0.678 | 0.871                           | 0.24  |
| 36          | rs9796     | -0.642 | 0.136 | 1.041          | 0.76  | 0.845           | 0.254 | 0.910             | 0.399 | 1.598  | 0.04  | -0.313 | 0.156 | 1.282                          | 0.297 | -0.042            | 0.394 | 1.066    | 0.71  | 1.054           | 0.74  | 0.874 | 0.609 | 0.954                           | 0.679 |
| 37          | rs1054875  | -0.046 | 0.915 | 0.941          | 0.644 | 1.147           |       |                   |       |        |       |        |       |                                |       |                   |       |          |       |                 |       |       |       |                                 |       |

| RIII (n=921) |            |        |       |                |       |                 |       |        |       |        |       |        |       |         |       |        |       |       |       |        |       |       |       |         |       |  |
|--------------|------------|--------|-------|----------------|-------|-----------------|-------|--------|-------|--------|-------|--------|-------|---------|-------|--------|-------|-------|-------|--------|-------|-------|-------|---------|-------|--|
|              |            | Age    |       | Smoking status |       | Alcohol drinker |       | edtyp3 |       | eGFR   |       | BMI    |       | cvdbase |       | chol   |       | DIAB  |       | stat h |       | HRT   |       | ant HTA |       |  |
| n            | SNP        | β      | p     | OR             | p     | OR              | p     | OR     | p     | β      | p     | β      | p     | OR      | p     | β      | p     | OR    | p     | OR     | p     | OR    | p     | OR      | p     |  |
| 1            | rs4246511  | -0.369 | 0.289 | 1.167          | 0.228 | 1.453           | 0.226 | 1.204  | 0.09  | 0.661  | 0.36  | 0.139  | 0.59  | 1.567   | 0.218 | -0.014 | 0.808 | 0.900 | 0.615 | 1.050  | 0.705 | 0.854 | 0.692 | 0.983   | 0.888 |  |
| 2            | rs12142240 | 0.112  | 0.729 | 1.047          | 0.697 | 1.016           | 0.96  | 0.980  | 0.844 | 0.055  | 0.935 | -0.203 | 0.393 | 0.409   | 0.002 | 0.122  | 0.018 | 1.013 | 0.947 | 0.796  | 0.055 | 0.845 | 0.652 | 1.110   | 0.374 |  |
| 3            | rs1411478  | -0.405 | 0.193 | 0.932          | 0.532 | 1.070           | 0.835 | 1.069  | 0.487 | -0.292 | 0.649 | -0.021 | 0.927 | 0.713   | 0.243 | -0.064 | 0.202 | 1.083 | 0.679 | 1.163  | 0.197 | 1.661 | 0.194 | 0.983   | 0.88  |  |
| 4            | rs2236918  | 0.250  | 0.422 | 1.036          | 0.756 | 0.920           | 0.818 | 1.006  | 0.947 | 0.228  | 0.729 | -0.112 | 0.625 | 0.645   | 0.142 | 0.023  | 0.649 | 0.905 | 0.601 | 0.827  | 0.102 | 2.021 | 0.076 | 0.928   | 0.506 |  |
| 5            | rs704795   | 0.096  | 0.75  | 1.224          | 0.068 | 0.896           | 0.663 | 0.956  | 0.634 | 0.601  | 0.343 | 0.092  | 0.679 | 0.997   | 0.992 | 0.040  | 0.413 | 0.903 | 0.58  | 1.062  | 0.594 | 1.193 | 0.624 | 1.289   | 0.021 |  |
| 6            | rs1800932  | 0.446  | 0.223 | 0.918          | 0.513 | 0.971           | 0.939 | 0.949  | 0.643 | -1.065 | 0.171 | 0.256  | 0.346 | 1.406   | 0.379 | -0.082 | 0.164 | 1.136 | 0.583 | 0.975  | 0.851 | 0.934 | 0.871 | 1.104   | 0.458 |  |
| 7            | rs930036   | 0.393  | 0.209 | 1.037          | 0.747 | 0.970           | 0.925 | 1.201  | 0.062 | 0.127  | 0.847 | -0.229 | 0.323 | 0.971   | 0.921 | 0.036  | 0.475 | 0.995 | 0.981 | 1.034  | 0.776 | 0.494 | 0.051 | 1.133   | 0.272 |  |
| 8            | rs16858210 | 0.391  | 0.27  | 1.031          | 0.815 | 0.867           | 0.629 | 0.960  | 0.711 | 0.422  | 0.561 | 0.169  | 0.519 | 0.714   | 0.277 | -0.003 | 0.964 | 1.273 | 0.298 | 1.204  | 0.173 | 1.650 | 0.304 | 0.847   | 0.181 |  |
| 9            | rs4693089  | 0.055  | 0.858 | 0.970          | 0.787 | 0.987           | 0.962 | 1.086  | 0.392 | -0.232 | 0.717 | -0.040 | 0.861 | 1.364   | 0.293 | 0.018  | 0.717 | 1.005 | 0.977 | 1.202  | 0.11  | 1.194 | 0.627 | 0.938   | 0.562 |  |
| 10           | rs6856693  | 0.132  | 0.672 | 0.935          | 0.552 | 0.758           | 0.289 | 1.004  | 0.966 | -0.617 | 0.336 | 0.213  | 0.354 | 1.329   | 0.327 | -0.002 | 0.974 | 1.245 | 0.247 | 0.857  | 0.19  | 1.039 | 0.917 | 0.964   | 0.743 |  |
| 11           | rs427394   | -0.423 | 0.161 | 1.141          | 0.23  | 1.008           | 0.979 | 1.044  | 0.648 | 0.555  | 0.374 | 0.119  | 0.595 | 1.190   | 0.553 | -0.006 | 0.908 | 1.150 | 0.454 | 1.250  | 0.05  | 0.585 | 0.128 | 1.040   | 0.716 |  |
| 12           | rs11738223 | -0.495 | 0.136 | 1.012          | 0.923 | 1.198           | 0.641 | 0.968  | 0.752 | 1.132  | 0.105 | 0.066  | 0.788 | 1.141   | 0.681 | 0.052  | 0.33  | 0.586 | 0.006 | 1.042  | 0.739 | 0.615 | 0.187 | 1.009   | 0.939 |  |
| 13           | rs2241584  | 0.214  | 0.495 | 1.104          | 0.387 | 1.244           | 0.541 | 1.019  | 0.845 | -0.223 | 0.729 | -0.186 | 0.421 | 1.099   | 0.753 | 0.053  | 0.29  | 0.909 | 0.616 | 1.037  | 0.758 | 2.216 | 0.065 | 1.173   | 0.161 |  |
| 14           | rs365132   | 0.043  | 0.89  | 0.985          | 0.894 | 0.742           | 0.44  | 1.042  | 0.668 | 0.650  | 0.318 | -0.084 | 0.713 | 1.849   | 0.042 | 0.002  | 0.968 | 1.123 | 0.541 | 1.057  | 0.628 | 1.842 | 0.102 | 1.297   | 0.02  |  |
| 15           | rs6899676  | -0.086 | 0.815 | 1.134          | 0.351 | 1.007           | 0.984 | 0.922  | 0.476 | 0.199  | 0.791 | 0.468  | 0.083 | 0.653   | 0.183 | -0.010 | 0.866 | 1.507 | 0.098 | 0.942  | 0.66  | 0.655 | 0.285 | 0.923   | 0.54  |  |
| 16           | rs9393800  | 0.487  | 0.17  | 0.857          | 0.223 | 1.164           | 0.632 | 0.971  | 0.789 | -0.102 | 0.891 | -0.488 | 0.064 | 2.152   | 0.066 | 0.036  | 0.528 | 0.884 | 0.56  | 1.264  | 0.088 | 1.031 | 0.942 | 1.059   | 0.656 |  |
| 17           | rs2230365  | 0.219  | 0.61  | 0.824          | 0.198 | 1.583           | 0.247 | 1.409  | 0.013 | -1.112 | 0.227 | -0.170 | 0.59  | 1.129   | 0.772 | 0.011  | 0.869 | 1.075 | 0.788 | 1.330  | 0.091 | 1.306 | 0.627 | 0.817   | 0.174 |  |
| 18           | rs707938   | 0.449  | 0.17  | 0.690          | 0.001 | 0.760           | 0.509 | 0.804  | 0.031 | 1.011  | 0.14  | 0.207  | 0.39  | 1.362   | 0.345 | 0.018  | 0.738 | 1.046 | 0.823 | 0.894  | 0.352 | 0.577 | 0.13  | 1.015   | 0.897 |  |
| 19           | rs12196873 | -0.166 | 0.715 | 0.892          | 0.477 | 1.002           | 0.997 | 1.322  | 0.055 | 0.307  | 0.747 | -0.122 | 0.716 | 1.053   | 0.907 | -0.016 | 0.829 | 0.693 | 0.143 | 1.052  | 0.767 | 4.993 | 0.123 | 0.904   | 0.528 |  |
| 20           | rs2720044  | -0.208 | 0.655 | 1.246          | 0.207 | 0.682           | 0.412 | 0.921  | 0.562 | 0.098  | 0.92  | -0.446 | 0.191 | 0.911   | 0.827 | -0.022 | 0.768 | 1.041 | 0.888 | 0.859  | 0.367 | 0.824 | 0.709 | 1.090   | 0.611 |  |
| 21           | rs10957156 | -0.278 | 0.416 | 1.075          | 0.562 | 0.869           | 0.739 | 1.115  | 0.309 | 0.697  | 0.321 | 0.140  | 0.579 | 1.464   | 0.286 | -0.061 | 0.266 | 1.166 | 0.479 | 1.262  | 0.078 | 0.515 | 0.073 | 1.235   | 0.095 |  |
| 22           | rs4879656  | 0.105  | 0.732 | 1.134          | 0.261 | 0.795           | 0.546 | 0.918  | 0.362 | 0.292  | 0.654 | 0.008  | 0.973 | 1.092   | 0.762 | 0.075  | 0.127 | 1.189 | 0.366 | 0.919  | 0.459 | 0.580 | 0.127 | 1.078   | 0.498 |  |
| 23           | rs10905065 | -0.072 | 0.818 | 1.058          | 0.617 | 0.828           | 0.587 | 1.104  | 0.308 | -0.020 | 0.976 | -0.083 | 0.719 | 1.471   | 0.181 | -0.027 | 0.59  | 0.833 | 0.352 | 1.083  | 0.491 | 0.969 | 0.932 | 1.043   | 0.705 |  |
| 24           | rs11031006 | 0.129  | 0.746 | 1.001          | 0.996 | 0.887           | 0.785 | 1.120  | 0.362 | 0.959  | 0.259 | -0.058 | 0.843 | 1.493   | 0.36  | -0.077 | 0.229 | 1.158 | 0.567 | 1.004  | 0.978 | 0.753 | 0.509 | 1.128   | 0.41  |  |
| 25           | rs6484478  | 0.128  | 0.724 | 1.110          | 0.437 | 1.111           | 0.801 | 0.950  | 0.649 | -2.184 | 0.005 | 0.037  | 0.889 | 0.936   | 0.845 | -0.027 | 0.647 | 1.025 | 0.914 | 0.942  | 0.656 | 1.416 | 0.47  | 0.783   | 0.053 |  |
| 26           | rs10734411 | -0.237 | 0.442 | 0.957          | 0.691 | 1.203           | 0.571 | 0.970  | 0.75  | -0.226 | 0.73  | 0.349  | 0.125 | 0.948   | 0.855 | -0.047 | 0.349 | 1.237 | 0.263 | 1.063  | 0.592 | 0.795 | 0.529 | 1.104   | 0.37  |  |
| 27           | rs2277339  | 0.969  | 0.062 | 0.933          | 0.707 | 1.193           | 0.687 | 1.153  | 0.39  | -0.120 | 0.913 | 0.432  | 0.258 | 1.243   | 0.682 | -0.004 | 0.961 | 1.100 | 0.773 | 0.954  | 0.807 | 3.433 | 0.228 | 1.147   | 0.476 |  |
| 28           | rs3741604  | -0.021 | 0.947 | 0.829          | 0.099 | 1.549           | 0.206 | 1.026  | 0.796 | -1.010 | 0.122 | 0.026  | 0.91  | 1.021   | 0.944 | 0.033  | 0.514 | 0.960 | 0.83  | 1.084  | 0.489 | 0.780 | 0.5   | 1.178   | 0.145 |  |
| 29           | rs1183272  | -0.122 | 0.694 | 0.957          | 0.695 | 1.239           | 0.521 | 1.017  | 0.865 | -0.678 | 0.288 | 0.256  | 0.263 | 0.818   | 0.495 | 0.039  | 0.433 | 0.982 | 0.922 | 1.067  | 0.572 | 0.936 | 0.855 | 1.075   | 0.515 |  |
| 30           | rs7397861  | 0.008  | 0.98  | 1.200          | 0.099 | 1.038           | 0.896 | 0.914  | 0.35  | -1.154 | 0.069 | 0.139  | 0.542 | 0.744   | 0.337 | 0.009  | 0.853 | 1.123 | 0.536 | 0.885  | 0.294 | 0.930 | 0.843 | 1.071   | 0.533 |  |
| 31           | rs551087   | 0.825  | 0.013 | 0.870          | 0.244 | 0.807           | 0.572 | 0.933  | 0.498 | -0.936 | 0.185 | -0.009 | 0.972 | 1.162   | 0.651 | 0.006  | 0.905 | 1.165 | 0.468 | 1.162  | 0.236 | 0.933 | 0.858 | 1.115   | 0.37  |  |
| 32           | rs1727326  | 0.201  | 0.678 | 0.963          | 0.827 | 0.775           | 0.644 | 0.854  | 0.283 | -0.352 | 0.725 | -0.163 | 0.647 | 0.851   | 0.71  | 0.045  | 0.566 | 1.172 | 0.609 | 1.285  | 0.184 | 0.711 | 0.51  | 1.223   | 0.262 |  |
| 33           | rs12824058 | 0.118  | 0.701 | 1.106          | 0.367 | 0.874           | 0.67  | 1.099  | 0.324 | -0.101 | 0.873 | -0.085 | 0.708 | 0.792   | 0.412 | -0.029 | 0.551 | 1.025 | 0.896 | 0.981  | 0.868 | 0.933 | 0.846 | 0.906   | 0.37  |  |
| 34           | rs4886238  | 0.108  | 0.731 | 0.923          | 0.482 | 1.136           | 0.712 | 1.036  | 0.72  | 1.194  | 0.065 | -0.262 | 0.258 | 0.591   | 0.062 | -0.018 | 0.718 | 0.935 | 0.725 | 0.899  | 0.362 | 1.166 | 0.696 | 0.954   | 0.678 |  |
| 35           | rs1713460  | 0.069  | 0.832 | 1.047          | 0.699 | 1.027           | 0.93  | 0.912  | 0.359 | 1.069  | 0.125 | 0.036  | 0.883 | 1.167   | 0.626 | 0.050  | 0.345 | 1.270 | 0.251 | 1.045  | 0.717 | 1.182 | 0.671 | 1.120   | 0.337 |  |
| 36           | rs9796     | -0.027 | 0.927 | 0.988          | 0.907 | 0.975           | 0.931 | 1.055  | 0.561 | 0.343  | 0.576 | 0.260  | 0.233 | 0.571   | 0.049 | 0.000  | 0.997 | 1.172 | 0.388 | 0.926  | 0.488 | 1.215 | 0.582 | 0.808   | 0.045 |  |
| 37           | rs1054875  | 0.035  | 0.913 | 0.902          | 0.365 | 1.079           | 0.843 | 1.050  | 0.616 | -0.417 | 0.525 | -0.410 |       |         |       |        |       |       |       |        |       |       |       |         |       |  |

TABLE S13. ASSOCIATION OF EACH SNP INCLUDED IN THE GENETIC RISK SCORE WITH BLOOD PRESSURE TRAITS BY STUDY.

|    |            | CoLaus (n=1141) |       |         |       |              |       | RS-I-3 (n=1,603) |       |         |       |              |       | RS-II-1 (n=790) |       |         |       |              |       | RS-III-1 (n=919) |       |         |       |              |       |
|----|------------|-----------------|-------|---------|-------|--------------|-------|------------------|-------|---------|-------|--------------|-------|-----------------|-------|---------|-------|--------------|-------|------------------|-------|---------|-------|--------------|-------|
|    |            | SBP             |       | DBP     |       | Hypertension |       | SBP              |       | DBP     |       | Hypertension |       | SBP             |       | DBP     |       | Hypertension |       | SBP              |       | DBP     |       | Hypertension |       |
| n  | SNP        | $\beta$         | p     | $\beta$ | p     | OR           | p     | $\beta$          | p     | $\beta$ | p     | OR           | p     | $\beta$         | p     | $\beta$ | p     | OR           | p     | $\beta$          | p     | $\beta$ | p     | OR           | p     |
| 1  | rs4246511  | -0.787          | 0.346 | -0.705  | 0.153 | 0.975        | 0.799 | -0.223           | 0.79  | -0.112  | 0.795 | 1.032        | 0.743 | 1.379           | 0.204 | 0.461   | 0.422 | 1.061        | 0.663 | 2.550            | 0.238 | 1.935   | 0.356 | 1.002        | 0.99  |
| 2  | rs12142240 | -0.194          | 0.814 | -0.193  | 0.692 | 0.904        | 0.305 | 0.688            | 0.394 | 0.295   | 0.481 | 0.910        | 0.304 | 0.179           | 0.867 | -0.515  | 0.362 | 1.120        | 0.396 | -1.578           | 0.432 | -1.554  | 0.425 | 1.158        | 0.243 |
| 3  | rs1411478  | 0.074           | 0.923 | -0.254  | 0.571 | 1.058        | 0.533 | -0.963           | 0.207 | -0.118  | 0.766 | 1.025        | 0.778 | 0.005           | 0.996 | 0.385   | 0.467 | 0.970        | 0.805 | 0.495            | 0.798 | 0.894   | 0.634 | 0.987        | 0.914 |
| 4  | rs2236918  | 0.535           | 0.478 | -0.425  | 0.341 | 1.033        | 0.721 | 0.368            | 0.633 | 0.417   | 0.298 | 0.953        | 0.590 | -1.231          | 0.228 | -0.808  | 0.134 | 0.859        | 0.231 | -0.051           | 0.979 | 0.227   | 0.904 | 0.929        | 0.537 |
| 5  | rs704795   | -0.482          | 0.534 | -0.833  | 0.069 | 0.944        | 0.535 | 0.155            | 0.839 | -0.199  | 0.615 | 1.033        | 0.710 | 0.626           | 0.530 | 0.368   | 0.484 | 1.152        | 0.251 | -1.684           | 0.369 | -2.211  | 0.224 | 1.284        | 0.032 |
| 6  | rs1800932  | -0.978          | 0.270 | -0.422  | 0.422 | 0.828        | 0.077 | -0.984           | 0.285 | 0.270   | 0.571 | 1.150        | 0.195 | -0.977          | 0.426 | -0.098  | 0.881 | 0.934        | 0.649 | -0.672           | 0.768 | -0.757  | 0.733 | 1.028        | 0.844 |
| 7  | rs930036   | 0.753           | 0.297 | -0.019  | 0.964 | 0.985        | 0.856 | -1.171           | 0.131 | -0.459  | 0.253 | 1.051        | 0.579 | 0.382           | 0.707 | 0.045   | 0.933 | 0.985        | 0.903 | -1.835           | 0.346 | -1.368  | 0.469 | 1.204        | 0.127 |
| 8  | rs16858210 | 0.141           | 0.867 | 0.268   | 0.592 | 1.123        | 0.246 | 0.418            | 0.635 | 0.132   | 0.773 | 1.112        | 0.302 | -0.265          | 0.815 | -0.788  | 0.187 | 1.136        | 0.367 | 2.054            | 0.351 | 1.886   | 0.378 | 0.853        | 0.230 |
| 9  | rs4693089  | 0.981           | 0.193 | 0.176   | 0.694 | 1.012        | 0.893 | 0.394            | 0.593 | -0.060  | 0.875 | 0.878        | 0.126 | 1.313           | 0.200 | 0.563   | 0.299 | 1.394        | 0.010 | 2.039            | 0.286 | 1.812   | 0.329 | 0.927        | 0.519 |
| 10 | rs6856693  | -0.096          | 0.898 | 0.034   | 0.940 | 0.940        | 0.493 | 0.545            | 0.487 | -1.066  | 0.009 | 0.824        | 0.034 | 0.155           | 0.882 | -0.329  | 0.552 | 1.014        | 0.914 | 2.802            | 0.148 | 2.766   | 0.141 | 1.084        | 0.495 |
| 11 | rs427394   | -0.096          | 0.898 | 0.461   | 0.304 | 1.131        | 0.174 | -0.099           | 0.895 | 0.313   | 0.418 | 0.868        | 0.097 | 0.124           | 0.901 | -0.061  | 0.908 | 0.946        | 0.655 | 1.911            | 0.308 | 1.680   | 0.356 | 1.131        | 0.287 |
| 12 | rs11738223 | 0.175           | 0.826 | 0.471   | 0.318 | 1.130        | 0.196 | 1.658            | 0.037 | 0.518   | 0.209 | 0.979        | 0.812 | 1.227           | 0.265 | -0.520  | 0.372 | 0.881        | 0.350 | -1.553           | 0.452 | -1.774  | 0.376 | 0.976        | 0.846 |
| 13 | rs2241584  | 0.005           | 0.995 | 0.471   | 0.296 | 1.088        | 0.351 | -1.380           | 0.070 | -0.401  | 0.311 | 0.960        | 0.636 | 0.808           | 0.453 | 0.358   | 0.530 | 0.866        | 0.279 | 1.516            | 0.436 | 0.978   | 0.605 | 1.125        | 0.327 |
| 14 | rs365132   | 1.261           | 0.093 | 0.482   | 0.278 | 1.287        | 0.005 | 1.173            | 0.116 | 0.279   | 0.472 | 1.097        | 0.280 | -0.588          | 0.558 | -0.610  | 0.250 | 0.958        | 0.727 | -0.334           | 0.862 | -0.761  | 0.684 | 1.286        | 0.035 |
| 15 | rs6899676  | -0.504          | 0.597 | 0.033   | 0.954 | 0.965        | 0.752 | 0.310            | 0.730 | 0.053   | 0.909 | 0.964        | 0.719 | 0.653           | 0.570 | -0.063  | 0.917 | 0.939        | 0.653 | 1.197            | 0.599 | 0.883   | 0.689 | 0.921        | 0.555 |
| 16 | rs9393800  | -0.070          | 0.936 | 0.080   | 0.877 | 0.858        | 0.143 | -1.387           | 0.105 | -0.263  | 0.553 | 0.952        | 0.612 | -1.579          | 0.158 | 0.256   | 0.666 | 0.886        | 0.377 | -0.496           | 0.822 | -0.281  | 0.896 | 0.909        | 0.478 |
| 17 | rs2230365  | 0.922           | 0.370 | 0.645   | 0.290 | 1.112        | 0.384 | 0.422            | 0.688 | 0.331   | 0.543 | 1.188        | 0.172 | 0.739           | 0.581 | 0.747   | 0.292 | 1.118        | 0.512 | 2.261            | 0.395 | 2.301   | 0.373 | 0.765        | 0.089 |
| 18 | rs707938   | 1.081           | 0.177 | 0.307   | 0.518 | 1.087        | 0.381 | 1.433            | 0.077 | 0.544   | 0.195 | 1.180        | 0.080 | -0.862          | 0.411 | 0.003   | 0.995 | 1.021        | 0.871 | 3.256            | 0.110 | 2.487   | 0.209 | 0.975        | 0.841 |
| 19 | rs12196873 | -1.077          | 0.267 | -1.126  | 0.050 | 0.868        | 0.225 | 1.200            | 0.282 | 0.201   | 0.728 | 1.193        | 0.183 | 0.359           | 0.813 | -0.742  | 0.355 | 1.155        | 0.457 | 1.574            | 0.576 | 2.434   | 0.373 | 0.939        | 0.714 |
| 20 | rs2720044  | -1.302          | 0.420 | -1.330  | 0.165 | 1.062        | 0.755 | 0.294            | 0.801 | 0.341   | 0.574 | 0.913        | 0.492 | 1.828           | 0.249 | 0.012   | 0.988 | 0.898        | 0.579 | 1.342            | 0.641 | 0.202   | 0.943 | 1.091        | 0.623 |
| 21 | rs10957156 | 0.037           | 0.966 | 0.089   | 0.861 | 0.937        | 0.528 | 0.092            | 0.915 | 0.124   | 0.781 | 0.876        | 0.174 | 1.642           | 0.157 | 0.731   | 0.233 | 0.965        | 0.803 | 2.058            | 0.333 | 1.728   | 0.402 | 1.274        | 0.071 |
| 22 | rs4879656  | 0.779           | 0.305 | 0.573   | 0.203 | 1.041        | 0.662 | 1.204            | 0.117 | 0.949   | 0.017 | 1.085        | 0.359 | 0.005           | 0.996 | 0.732   | 0.170 | 1.075        | 0.564 | -0.391           | 0.837 | -0.970  | 0.599 | 1.041        | 0.730 |
| 23 | rs10905065 | 0.380           | 0.610 | 0.687   | 0.119 | 1.027        | 0.763 | -0.624           | 0.409 | -0.008  | 0.984 | 1.068        | 0.446 | 0.107           | 0.914 | 0.064   | 0.902 | 0.889        | 0.336 | -0.479           | 0.805 | 0.229   | 0.903 | 1.052        | 0.671 |
| 24 | rs11031006 | 0.960           | 0.347 | 0.368   | 0.543 | 0.965        | 0.772 | 0.747            | 0.447 | -0.211  | 0.679 | 1.135        | 0.270 | 2.094           | 0.104 | 0.506   | 0.457 | 1.128        | 0.459 | -1.824           | 0.462 | -1.874  | 0.436 | 1.146        | 0.383 |
| 25 | rs6484478  | 2.072           | 0.023 | 0.808   | 0.134 | 1.080        | 0.478 | 1.472            | 0.106 | 0.527   | 0.265 | 1.093        | 0.405 | 1.179           | 0.324 | 0.460   | 0.467 | 0.986        | 0.924 | -4.740           | 0.036 | -3.451  | 0.117 | 0.743        | 0.028 |
| 26 | rs10734411 | 0.178           | 0.810 | 0.221   | 0.614 | 1.097        | 0.296 | 0.747            | 0.320 | -0.141  | 0.718 | 0.889        | 0.176 | -1.422          | 0.173 | -0.411  | 0.456 | 0.874        | 0.295 | -0.142           | 0.941 | -1.310  | 0.482 | 1.154        | 0.224 |
| 27 | rs2277339  | -3.323          | 0.029 | -1.422  | 0.115 | 0.690        | 0.047 | -0.117           | 0.928 | 0.614   | 0.357 | 1.022        | 0.884 | 0.785           | 0.641 | -0.508  | 0.568 | 0.995        | 0.979 | 2.795            | 0.387 | 3.280   | 0.296 | 1.036        | 0.859 |
| 28 | rs3741604  | 0.683           | 0.357 | 0.150   | 0.733 | 0.940        | 0.486 | 0.765            | 0.300 | 0.485   | 0.205 | 0.959        | 0.624 | 1.075           | 0.28  | 0.878   | 0.095 | 1.018        | 0.882 | 1.997            | 0.304 | 0.969   | 0.607 | 1.098        | 0.435 |
| 29 | rs1183272  | -0.001          | 0.999 | 0.358   | 0.418 | 1.078        | 0.396 | -0.478           | 0.519 | 0.096   | 0.804 | 0.981        | 0.821 | 0.757           | 0.439 | 0.613   | 0.236 | 1.082        | 0.518 | -0.830           | 0.666 | -1.108  | 0.553 | 0.998        | 0.987 |
| 30 | rs7397861  | -0.101          | 0.896 | -0.230  | 0.614 | 0.987        | 0.883 | -0.965           | 0.212 | -0.583  | 0.146 | 0.998        | 0.982 | 0.418           | 0.691 | 0.336   | 0.546 | 1.099        | 0.466 | -1.444           | 0.453 | -2.221  | 0.234 | 1.023        | 0.849 |
| 31 | rs551087   | 0.378           | 0.660 | 0.576   | 0.257 | 0.996        | 0.969 | -0.828           | 0.316 | -0.312  | 0.465 | 0.878        | 0.165 | 0.535           | 0.634 | -0.075  | 0.899 | 1.355        | 0.036 | -1.854           | 0.372 | -1.561  | 0.439 | 1.019        | 0.885 |
| 32 | rs1727326  | 1.443           | 0.219 | 1.104   | 0.112 | 1.158        | 0.298 | 0.105            | 0.931 | -0.484  | 0.438 | 0.869        | 0.299 | 1.846           | 0.248 | 0.687   | 0.416 | 1.255        | 0.272 | 2.988            | 0.319 | 2.109   | 0.468 | 1.266        | 0.223 |
| 33 | rs12824058 | -0.538          | 0.473 | -0.757  | 0.088 | 0.924        | 0.38  | -0.337           | 0.659 | 0.143   | 0.718 | 1.089        | 0.335 | 0.583           | 0.572 | 0.269   | 0.622 | 1.047        | 0.720 | -0.934           | 0.624 | -0.983  | 0.595 | 0.877        | 0.260 |
| 34 | rs4886238  | 0.144           | 0.854 | 0.874   | 0.059 | 1.049        | 0.607 | 0.414            | 0.608 | 0.396   | 0.344 | 1.043        | 0.651 | -1.448          | 0.169 | -0.657  | 0.238 | 1.102        | 0.464 | -4.228           | 0.031 | -4.069  | 0.033 | 0.935        | 0.571 |
| 35 | rs1713460  | -0.416          | 0.678 | 0.277   | 0.641 | 1.020        | 0.867 | 1.005            | 0.208 | -0.287  | 0.489 | 0.958        | 0.642 | -1.542          | 0.14  | -0.069  | 0.901 | 0.847        | 0.190 | -1.663           | 0.412 | -2.838  | 0.149 | 1.147        | 0.278 |
| 36 | rs9796     | 0.672           | 0.364 | 0.579   | 0.186 | 1.042        | 0.637 | -0.528           | 0.491 | -0.108  | 0.787 | 0.962        | 0.662 | -0.479          | 0.634 | -0.311  | 0.559 | 0.878        | 0.295 | 0.674            | 0.714 | 0.059   | 0.973 | 0.897        | 0.336 |

| CoLaus (n=1141) |            |         |       |         |       |              |       | RS-I-3 (n=1,603) |       |         |       |              |       |         |       | RS-II-1 (n=790) |       |              |       |         |       |         |       | RS-III-1 (n=919) |       |         |   |         |   |              |   |
|-----------------|------------|---------|-------|---------|-------|--------------|-------|------------------|-------|---------|-------|--------------|-------|---------|-------|-----------------|-------|--------------|-------|---------|-------|---------|-------|------------------|-------|---------|---|---------|---|--------------|---|
|                 |            | SBP     |       | DBP     |       | Hypertension |       | SBP              |       | DBP     |       | Hypertension |       | SBP     |       | DBP             |       | Hypertension |       | SBP     |       | DBP     |       | Hypertension     |       | SBP     |   | DBP     |   | Hypertension |   |
| n               | SNP        | $\beta$ | p     | $\beta$ | p     | OR           | p     | $\beta$          | p     | $\beta$ | p     | OR           | p     | $\beta$ | p     | $\beta$         | p     | OR           | p     | $\beta$ | p     | $\beta$ | p     | OR               | p     | $\beta$ | p | $\beta$ | p | OR           | p |
| 37              | rs1054875  | -0.290  | 0.709 | -0.182  | 0.693 | 1.065        | 0.495 | -0.146           | 0.848 | -0.224  | 0.571 | 0.920        | 0.339 | -1.129  | 0.264 | -0.227          | 0.671 | 0.944        | 0.643 | 1.108   | 0.573 | 2.247   | 0.239 | 0.848            | 0.172 |         |   |         |   |              |   |
| 38              | rs9039     | 0.759   | 0.385 | 0.214   | 0.678 | 0.938        | 0.537 | 0.414            | 0.612 | 0.080   | 0.849 | 1.008        | 0.931 | -1.106  | 0.304 | -0.429          | 0.451 | 0.947        | 0.677 | -2.448  | 0.244 | -3.577  | 0.079 | 0.808            | 0.092 |         |   |         |   |              |   |
| 39              | rs10852344 | 0.396   | 0.600 | 0.131   | 0.770 | 1.074        | 0.427 | -2.503           | 0.002 | -1.064  | 0.010 | 1.015        | 0.873 | 1.023   | 0.317 | -0.256          | 0.636 | 1.017        | 0.895 | 0.734   | 0.698 | 1.070   | 0.560 | 1.037            | 0.757 |         |   |         |   |              |   |
| 40              | rs12599106 | -1.265  | 0.170 | -0.815  | 0.135 | 0.869        | 0.201 | -0.803           | 0.296 | -0.126  | 0.752 | 0.942        | 0.498 | 1.657   | 0.104 | 0.539           | 0.318 | 1.369        | 0.014 | -1.996  | 0.315 | -2.474  | 0.199 | 1.149            | 0.256 |         |   |         |   |              |   |
| 41              | rs8070740  | -0.872  | 0.305 | -0.667  | 0.185 | 0.871        | 0.176 | 1.059            | 0.227 | 0.233   | 0.609 | 1.027        | 0.791 | -0.535  | 0.646 | 0.000           | 0.999 | 0.889        | 0.402 | -2.781  | 0.204 | -2.499  | 0.240 | 1.039            | 0.778 |         |   |         |   |              |   |
| 42              | rs2941505  | -0.220  | 0.776 | 0.361   | 0.429 | 1.018        | 0.847 | 0.911            | 0.251 | 0.295   | 0.473 | 0.967        | 0.710 | -1.293  | 0.221 | -0.545          | 0.33  | 0.874        | 0.297 | 0.896   | 0.654 | 0.639   | 0.742 | 1.082            | 0.527 |         |   |         |   |              |   |
| 43              | rs1799949  | 0.216   | 0.790 | 0.109   | 0.821 | 1.090        | 0.371 | 0.542            | 0.491 | 0.613   | 0.133 | 0.768        | 0.003 | 0.240   | 0.822 | -0.168          | 0.766 | 0.974        | 0.840 | 1.929   | 0.320 | 2.133   | 0.258 | 0.931            | 0.543 |         |   |         |   |              |   |
| 44              | rs349306   | -3.019  | 0.073 | -1.384  | 0.166 | 0.561        | 0.004 | 0.230            | 0.871 | -0.479  | 0.514 | 1.570        | 0.011 | 4.680   | 0.147 | 0.628           | 0.714 | 1.734        | 0.202 | 2.461   | 0.456 | 2.543   | 0.427 | 0.718            | 0.084 |         |   |         |   |              |   |
| 45              | rs7259376  | -0.556  | 0.469 | -0.572  | 0.208 | 0.943        | 0.518 | -0.301           | 0.687 | -0.634  | 0.101 | 0.970        | 0.721 | -0.864  | 0.378 | -0.251          | 0.628 | 0.967        | 0.785 | 2.195   | 0.237 | 1.935   | 0.283 | 1.185            | 0.139 |         |   |         |   |              |   |
| 46              | rs11668344 | -0.047  | 0.953 | -0.330  | 0.488 | 0.973        | 0.773 | -0.972           | 0.200 | -0.409  | 0.299 | 0.964        | 0.670 | -0.430  | 0.678 | -0.348          | 0.526 | 1.091        | 0.498 | 0.096   | 0.960 | 0.296   | 0.875 | 1.001            | 0.994 |         |   |         |   |              |   |
| 47              | rs2547274  | -0.385  | 0.806 | 0.291   | 0.754 | 0.753        | 0.136 | -1.989           | 0.118 | -1.354  | 0.040 | 0.924        | 0.578 | 0.352   | 0.844 | 0.751           | 0.426 | 1.188        | 0.448 | 3.414   | 0.343 | 3.360   | 0.337 | 1.210            | 0.412 |         |   |         |   |              |   |
| 48              | rs12461110 | -1.549  | 0.074 | -0.400  | 0.436 | 0.892        | 0.270 | 1.470            | 0.057 | 0.160   | 0.690 | 1.035        | 0.701 | 0.488   | 0.642 | -0.432          | 0.437 | 1.171        | 0.233 | 1.366   | 0.489 | 1.484   | 0.439 | 0.798            | 0.063 |         |   |         |   |              |   |
| 49              | rs451417   | -1.874  | 0.106 | -1.412  | 0.039 | 0.841        | 0.219 | 0.265            | 0.821 | -0.106  | 0.861 | 0.962        | 0.773 | -3.413  | 0.031 | -0.740          | 0.376 | 1.196        | 0.381 | 2.197   | 0.473 | 2.728   | 0.358 | 1.322            | 0.155 |         |   |         |   |              |   |
| 50              | rs16991615 | -1.104  | 0.518 | -0.627  | 0.536 | 0.968        | 0.874 | 1.095            | 0.457 | 1.045   | 0.171 | 0.833        | 0.258 | 0.023   | 0.990 | 0.052           | 0.958 | 0.946        | 0.808 | 2.341   | 0.539 | 2.078   | 0.574 | 0.715            | 0.126 |         |   |         |   |              |   |
| 51              | rs2236553  | -0.761  | 0.535 | 0.160   | 0.825 | 0.901        | 0.474 | 0.269            | 0.774 | -0.129  | 0.790 | 0.924        | 0.461 | -1.370  | 0.242 | -0.306          | 0.621 | 1.024        | 0.869 | -2.297  | 0.297 | -3.103  | 0.146 | 0.902            | 0.441 |         |   |         |   |              |   |
| 52              | rs13040088 | 0.354   | 0.717 | 0.888   | 0.125 | 1.139        | 0.261 | -0.248           | 0.789 | 0.567   | 0.238 | 0.936        | 0.531 | -1.146  | 0.338 | -0.518          | 0.413 | 0.913        | 0.531 | 0.477   | 0.839 | -0.755  | 0.741 | 1.005            | 0.975 |         |   |         |   |              |   |
| 53              | rs5762534  | 2.952   | 0.004 | 0.260   | 0.669 | 1.262        | 0.056 | -1.724           | 0.093 | -0.320  | 0.548 | 1.012        | 0.922 | -0.599  | 0.662 | -0.421          | 0.561 | 0.899        | 0.519 | -2.532  | 0.354 | -2.048  | 0.440 | 1.105            | 0.561 |         |   |         |   |              |   |
| 54              | rs763121   | 0.195   | 0.805 | 0.447   | 0.341 | 0.950        | 0.587 | 1.608            | 0.045 | -0.040  | 0.923 | 0.983        | 0.85  | -0.893  | 0.398 | -0.744          | 0.183 | 0.945        | 0.663 | 0.712   | 0.724 | 1.110   | 0.570 | 0.974            | 0.829 |         |   |         |   |              |   |

Bonferroni correction for significant threshold  $p=0.0009259259$

Beta estimates correspond to adjusted values (age, eGFR).

TABLE S14. CAUSAL ESTIMATES DERIVED FROM INSTRUMENTAL VARIABLE ANALYSIS GENETIC RISK SCORE WITH SNPs RELATED AND NON-RELATED TO DNA DAMAGE-RESPONSE (DDR) GENES.

| Variable                                                                              | CoLaus (n=1139)     |      | RS-I-3(n=1603)       |       | RS-II-1(n=790)       |       | RS-III-1(n=919)    |      | Meta-analysis        |                |
|---------------------------------------------------------------------------------------|---------------------|------|----------------------|-------|----------------------|-------|--------------------|------|----------------------|----------------|
|                                                                                       | $\beta$ (95% CI)    | p    | $\beta$ (95% CI)     | p     | $\beta$ (95% CI)     | p     | $\beta$ (95% CI)   | p    | $\beta$ (95% CI)     | I <sup>2</sup> |
| <i>Genetic Risk Score with 37 SNPs related to DNA damage-response (DDR) genes</i>     |                     |      |                      |       |                      |       |                    |      |                      |                |
| Crude                                                                                 |                     |      |                      |       |                      |       |                    |      |                      |                |
| Systolic BP                                                                           | -2.17 (-6.62; 2.29) | 0.34 | 0.65 (-0.59;1.89)    | 0.30  | -0.52 (-2.33;1.27)   | 0.57  | 1.37 (-0.51; 3.25) | 0.15 | 0.42 (-0.46; 1.30)   | 13.1%          |
| Diastolic BP                                                                          | -0.61 (-2.85; 1.62) | 0.59 | -0.35 (-0.99;0.28)   | 0.28  | -0.39 (-1.32;0.45)   | 0.38  | 0.39 (-0.64; 1.43) | 0.45 | -0.23 (-0.68; 0.22)  | 0.0%           |
| *Hypertension                                                                         | 0.93 (0.61;1.42)    | 0.77 | 1.04 (0.92;1.19)     | 0.51  | 1.04 (0.88;1.24)     | 0.704 | 1.04 (0.83;1.26)   | 0.68 | 1.04 (0.95;1.13)     | 0.0%           |
| Adjusted                                                                              |                     |      |                      |       |                      |       |                    |      |                      |                |
| Systolic BP                                                                           | -1.39 (-4.04;1.35)  | 0.41 | 0.66 (-0.53;1.85)    | 0.28  | -0.75 ( -2.41; 0.90) | 0.37  | 0.87 (-1.09;2.81)  | 0.39 | 0.21 (-0.63; 1.04)   | 4.9%           |
| Diastolic BP                                                                          | -0.32 (-2.16;1.51)  | 0.73 | -0.25 (-0.88;0.36)   | 0.42  | -0.52 (-1.42;0.37)   | 0.25  | 0.30 (-0.79;1.40)  | 0.58 | -0.27 (-0.71; 0.18)  | 0.0%           |
| *Hypertension                                                                         | 0.90 (0.58;1.41)    | 0.67 | 1.06 (0.93; 1.22)    | 0.39  | 1.06 (0.88; 1.29)    | 0.52  | 1.04 (0.85;1.28)   | 0.66 | 1.05 (0.95;1.15)     | 0.0%           |
| <i>Genetic Risk Score with 17 SNPs non-related to DNA damage-response (DDR) genes</i> |                     |      |                      |       |                      |       |                    |      |                      |                |
| Crude                                                                                 |                     |      |                      |       |                      |       |                    |      |                      |                |
| Systolic BP                                                                           | 3.77 ( -4.02;11.57) | 0.34 | -4.79 (-8.07;-1.51)  | 0.004 | -1.81 (-8.67; 5.05)  | 0.61  | 0.45 (-3.17; 4.08) | 0.81 | -1.88 (-4.08; 0.32)  | 54.8%          |
| Diastolic BP                                                                          | 1.93 (-2.33; 6.19)  | 0.38 | -1.27 (-2.64;0.10)   | 0.07  | 0.56 (-2.67;3.81)    | 0.73  | -0.15 (-2.19;1.89) | 0.88 | -0.60 (-1.64; 0.44)  | 0.0%           |
| *Hypertension                                                                         | 1.70 (0.87;3.32)    | 0.12 | 0.76 (0.60;0.98)     | 0.03  | 1.21 (0.641;2.29)    | 0.553 | 0.98 (0.68;1.41)   | 0.93 | 0.90 (0.75;1.08)     | 52.6%          |
| Adjusted                                                                              |                     |      |                      |       |                      |       |                    |      |                      |                |
| Systolic BP                                                                           | 1.73 (-5.89; 9.35)  | 0.66 | -4.44 (-7.67; -1.22) | 0.007 | -3.66 (-11.75; 4.43) | 0.38  | -0.19 (-3.54;3.16) | 0.91 | -2.16 (-4.30; -0.02) | 31.6%          |
| Diastolic BP                                                                          | 2.91 (-3.33;9.16)   | 0.36 | -1.39 (-2.81; 0.02)  | 0.05  | 0.43 (-3.11;3.97)    | 0.81  | -0.01 (-1.88;1.86) | 0.99 | -0.66 (-1.72; 0.40)  | 3.5%           |
| *Hypertension                                                                         | 1.54 (0.74;3.22)    | 0.25 | 0.80 (0.62;1.04)     | 0.09  | 1.18 (0.58;2.39)     | 0.66  | 0.84 (0.58; 1.25)  | 0.41 | 0.88 (0.72;1.07)     | 13.3%          |

\*OR= Odds ratio; CI=Confidence interval; p=p value

TABLE S15. OUTLIER SNPs IDENTIFIED IN THE MR-PRESSO

| SNP        | p value |
|------------|---------|
| rs10852344 | 0.044   |
| rs5762534  | 0.044   |
| rs707938   | <0.004  |
| rs930036   | <0.004  |
| rs9796     | 0.012   |

TABLE S16. CAUSAL ESTIMATES OF ANM IN SYSTOLIC AND DIASTOLIC BLOOD PRESSURE FROM SNPs RELATED AND NON-RELATED TO DDR GENES USING METHODS IMPLEMENTED IN MR-BASE WITH DATA FROM GWAS OF ANM AND UK BIOBANK

| Outcome      | Method                    | $\beta$ | SE    | p-value | P <sub>h</sub>       | Q-statistics |
|--------------|---------------------------|---------|-------|---------|----------------------|--------------|
| 29 SNPs*     |                           |         |       |         |                      |              |
| Diastolic BP | Weighted median           | 0.082   | 0.059 | 0.165   | 2.22e <sup>-12</sup> | 114.2392     |
|              | Inverse Variance Weighted | 0.071   | 0.076 | 0.353   |                      |              |
|              | MR-PRESSO                 | 0.086   | 0.054 | 0.125   |                      |              |
|              | MR-Egger                  | 0.085   | 0.169 | 0.618   |                      |              |
| Systolic BP  | Weighted median           | 0.357   | 0.096 | <0.001  | 6.10e <sup>-11</sup> | 105.6183     |
|              | Inverse Variance Weighted | 0.291   | 0.120 | 0.0151  |                      |              |
|              | MR-PRESSO                 | 0.312   | 0.090 | 0.002   |                      |              |
|              | MR-Egger                  | 0.329   | 0.266 | 0.226   |                      |              |
| 17 SNPs**    |                           |         |       |         |                      |              |
| Diastolic BP | Weighted median           | -0.030  | 0.105 | 0.772   | 1.40e <sup>-07</sup> | 63.36921     |
|              | Inverse Variance Weighted | -0.046  | 0.135 | 0.732   |                      |              |
|              | MR-PRESSO                 | -0.042  | 0.091 | 0.650   |                      |              |
|              | MR-Egger                  | 0.279   | 0.542 | 0.614   |                      |              |
| Systolic BP  | Weighted median           | 0.040   | 0.189 | 0.831   | 6.97e <sup>-06</sup> | 53.21131     |
|              | Inverse Variance Weighted | 0.175   | 0.203 | 0.389   |                      |              |
|              | MR-PRESSO                 | 0.156   | 0.170 | 0.375   |                      |              |
|              | MR-Egger                  | 0.136   | 0.825 | 0.871   |                      |              |

(CI) Confidence Interval;  $P_h$ , P-value for heterogeneity

\* From 39 Damage DNA repair SNPs were identified in the reference GWAS of age at natural menopause Day et al. Clumping the identified SNPs just 29 SNPs were identified as independent and included in the analyses.

\*\* From 17 Non-Damage DNA repair SNPs were identified in the reference GWAS of age at natural menopause Day et al. The 17 SNPs were classified as independent SNPs after the implementation of the function clump in the two MR package.

TABLE S17. IDENTIFICATION OF PLEIOTROPIC SNPs

| <i>SNP</i> | <i>CHR</i> | <i>Position<br/>(bp)</i> | <i>EA</i> | <i>OA</i> | <i>Gene</i>     | <i>INFO</i> | <i>BMI</i> | <i>Menarche</i> |
|------------|------------|--------------------------|-----------|-----------|-----------------|-------------|------------|-----------------|
| rs704795   | 2          | 27716494                 | A         | G         | <i>FNDC4</i>    | 0.999       | x          |                 |
| rs11738223 | 5          | 171934492                | G         | A         | <i>SH3PXD2B</i> | 0.990       | x          |                 |
| rs365132   | 5          | 176378574                | T         | G         | <i>UIMC1</i>    | 1.000       |            | x               |
| rs11031006 | 11         | 30226528                 | A         | G         | <i>ARL14EP</i>  | 0.993       |            | x               |
| rs6484478  | 11         | 30306440                 | G         | A         | <i>FSHB</i>     | 0.999       | x          |                 |
| rs9039     | 16         | 9205363                  | C         | T         | <i>C16orf72</i> | 0.989       | x          |                 |
| rs8070740  | 17         | 5331896                  | G         | A         | <i>RPAIN</i>    | 0.998       | x          |                 |
| rs1799949  | 17         | 41245466                 | A         | G         | <i>BRCA1</i>    | 1.000       | x          |                 |

TABLE S18. TWO-SAMPLE MENDELIAN RANDOMIZATION EXCLUDING SNPs ASSOCIATED WITH BMI AND MENARCHE

| Outcome/Method           | BMI (37 SNPs) |       |         | Menarche (38 SNPs) |       |         |
|--------------------------|---------------|-------|---------|--------------------|-------|---------|
|                          | Beta          | SE    | p-value | Beta               | SE    | p-value |
| Diastolic blood pressure |               |       |         |                    |       |         |
| Weighted median          | 0.051         | 0.056 | 0.362   | 0.018              | 0.054 | 0.741   |
| Inverse Variance         | 0.052         | 0.067 | 0.439   | 0.059              | 0.068 | 0.386   |
| Weighted                 |               |       |         |                    |       |         |
| MR-Egger                 | 0.988         | 0.153 | 0.522   | 0.110              | 0.153 | 0.476   |
| MR-Egger Intercept       | -0.010        | 0.031 | 0.737   | -0.011             | 0.029 | 0.710   |
| MR-PRESSO                | 0.058         | 0.051 | 0.263   | 0.066              | 0.052 | 0.214   |
| Systolic blood pressure  |               |       |         |                    |       |         |
| Weighted median          | 0.366         | 0.096 | <0.001  | 0.354              | 0.094 | <0.001  |
| Inverse Variance         | 0.252         | 0.109 | 0.021   | 0.277              | 0.108 | 0.010   |
| Weighted                 |               |       |         |                    |       |         |
| MR-Egger                 | 0.300         | 0.247 | 0.249   | 0.300              | 0.243 | 0.237   |
| MR-Egger Intercept       | -0.008        | 0.049 | 0.865   | -0.005             | 0.047 | 0.923   |
| MR-PRESSO                | 0.259         | 0.099 | 0.013   | 0.265              | 0.084 | 0.003   |

TABLE S19. TWO-SAMPLE MENDELIAN RANDOMIZATION INCLUDING ALL SNPs

|                           | 53 SNPs               |       |         |
|---------------------------|-----------------------|-------|---------|
| Outcome/Method            | Beta                  | SE    | p-value |
| Diastolic Blood pressure  |                       |       |         |
| Weighted median           | 0.044                 | 0.050 | 0.381   |
| Inverse Variance Weighted | 0.046                 | 0.054 | 0.394   |
| MR-Egger                  | 0.115                 | 0.129 | 0.373   |
| MR-Egger Intercept        | -0.015(-0.064;0.034)  |       |         |
| Systolic Blood pressure   |                       |       |         |
| Weighted median           | 0.132                 | 0.083 | 0.112   |
| Inverse Variance Weighted | 0.209                 | 0.086 | 0.015   |
| MR-Egger                  | 0.268                 | 0.207 | 0.194   |
| MR-Egger Intercept        | -0.013(-0.091; 0.066) |       |         |



Figure S1. Flow chart of Study sample.

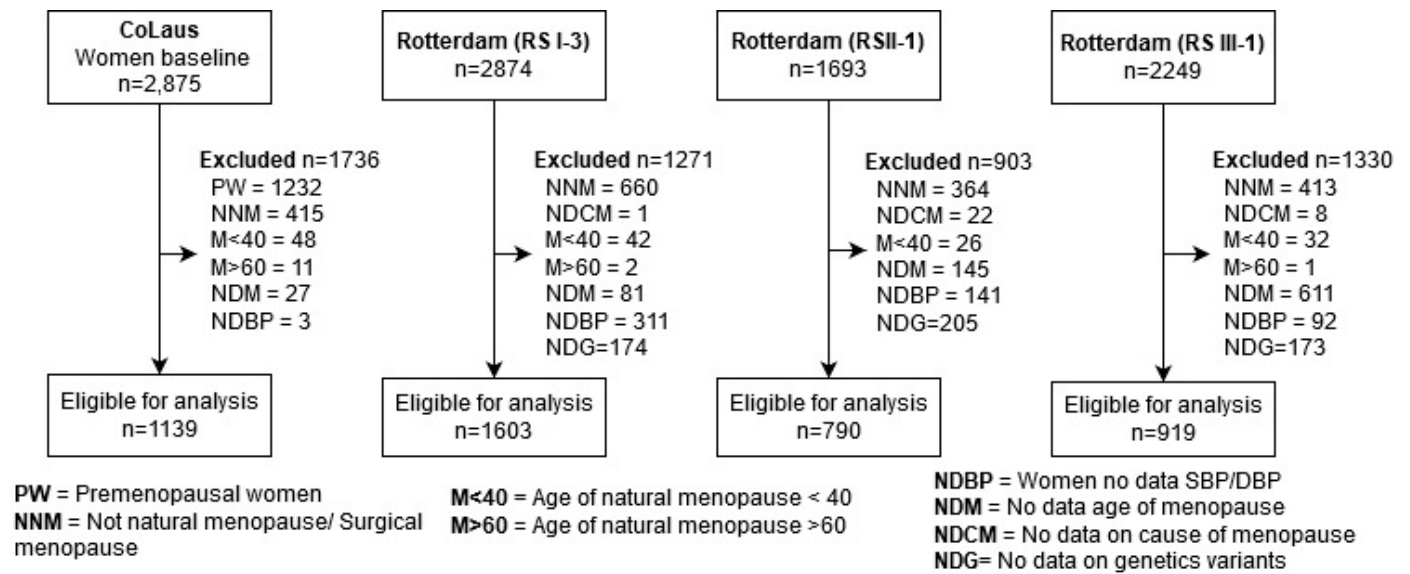

Figure S2. Non-linear spline models.

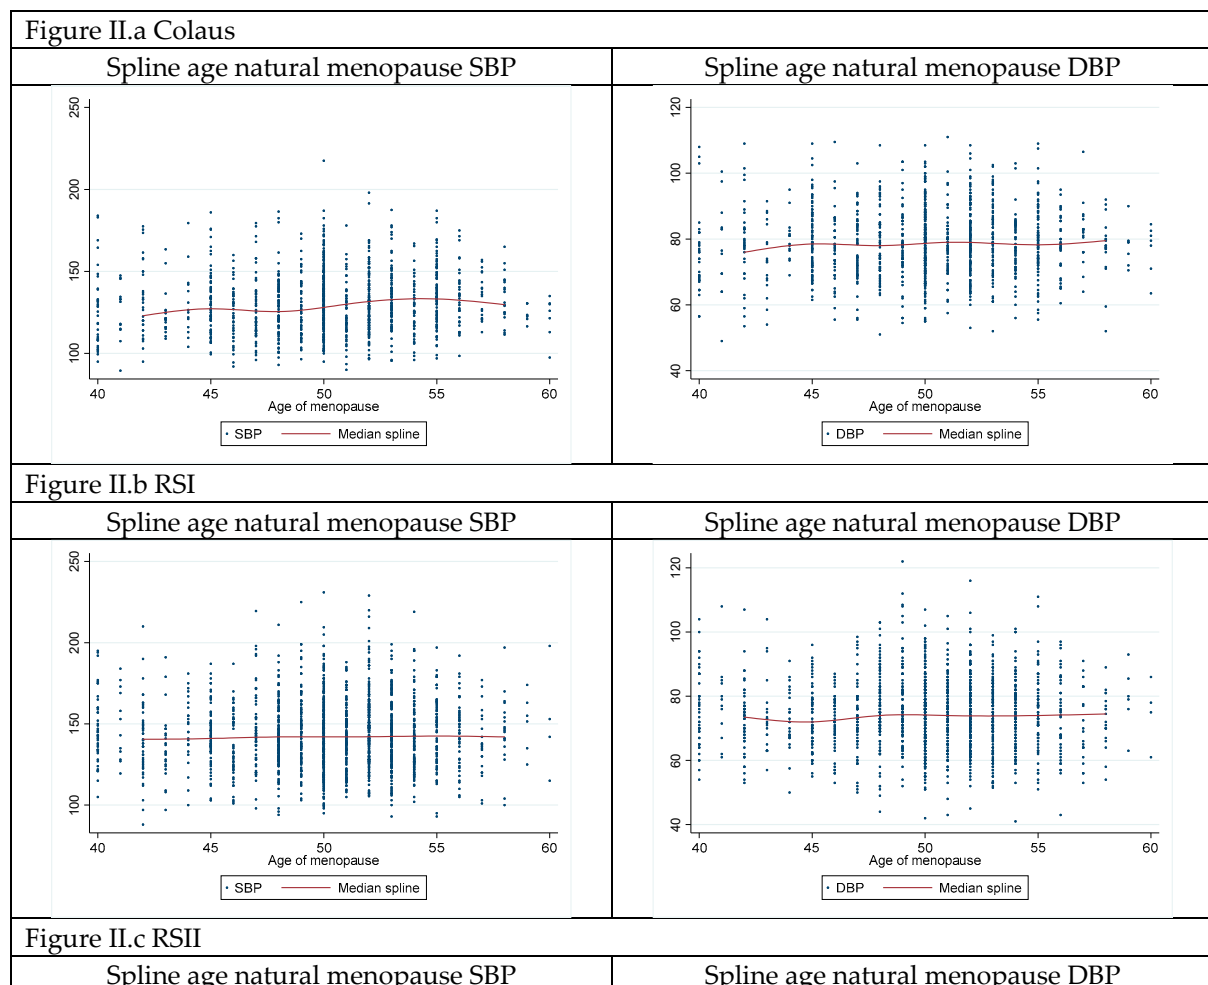

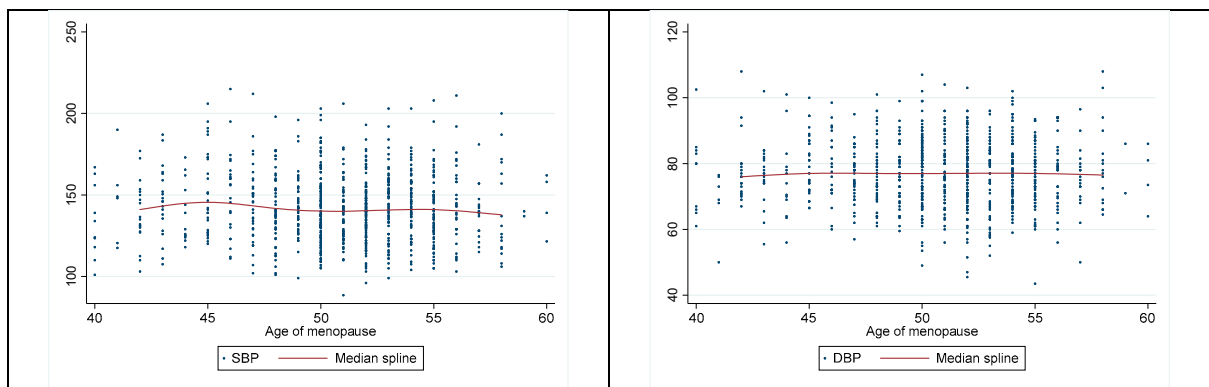

Figure II.d RSIII

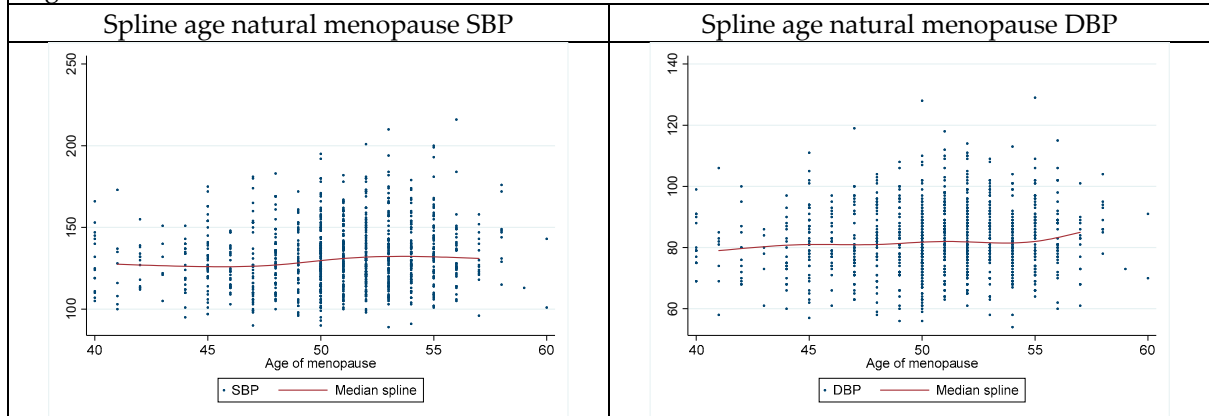

FIGURE S3. SENSITIVITY ANALYSIS OBSERVATIONAL ASSOCIATION ANM AND BLOOD PRESSURE TRAITS

Figure S3a. Age of natural menopause association with Blood Pressure in women without Hormone Therapy

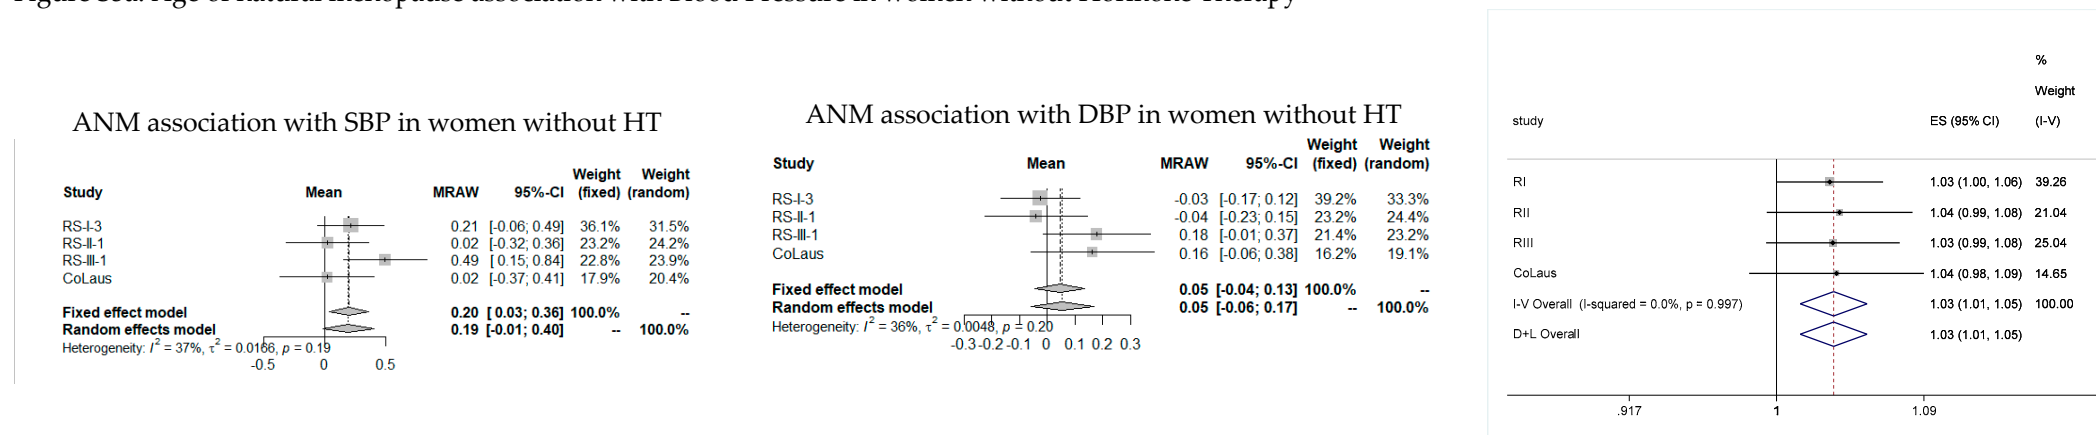

RS-I-3 n= 1466; RS-II-1 n= 759; RS-III-1 n= 898; CoLaus n= 499. 827 observations deleted which include missing values and women who reported the use of hormone replacement therapy. Regressions by study were not adjusted by Hormone replacement therapy.

Figure S3b. Age of natural menopause association with Blood Pressure traits in women aged 65 years and younger.

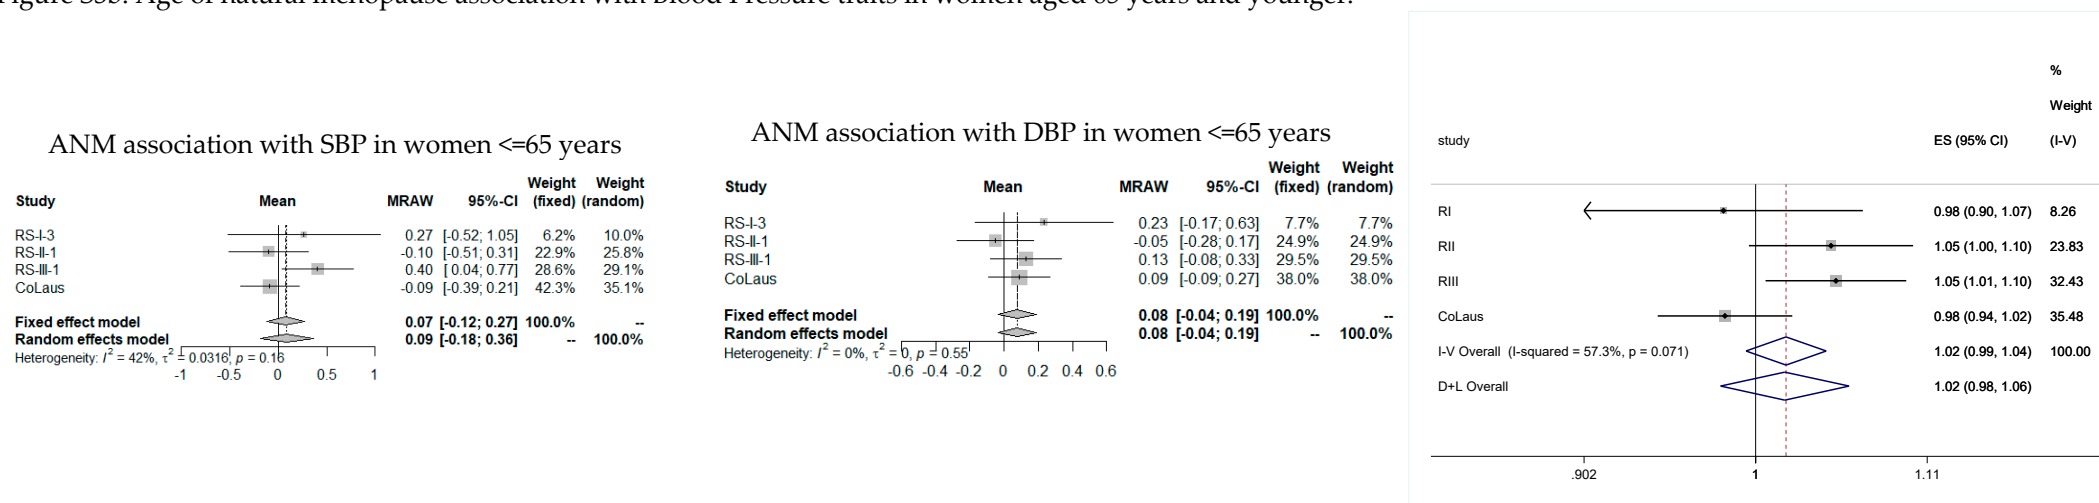

RS-I-3 n= 235; RS-II-1 n= 518; RS-III-1 n=826; CoLaus n=818. 2,052 observations deleted which include women older than 65 years old

Regressions by study were fully adjusted.

Figure S3c. Age of natural menopause association with Blood Pressure traits in women without history of cardiovascular diseases.

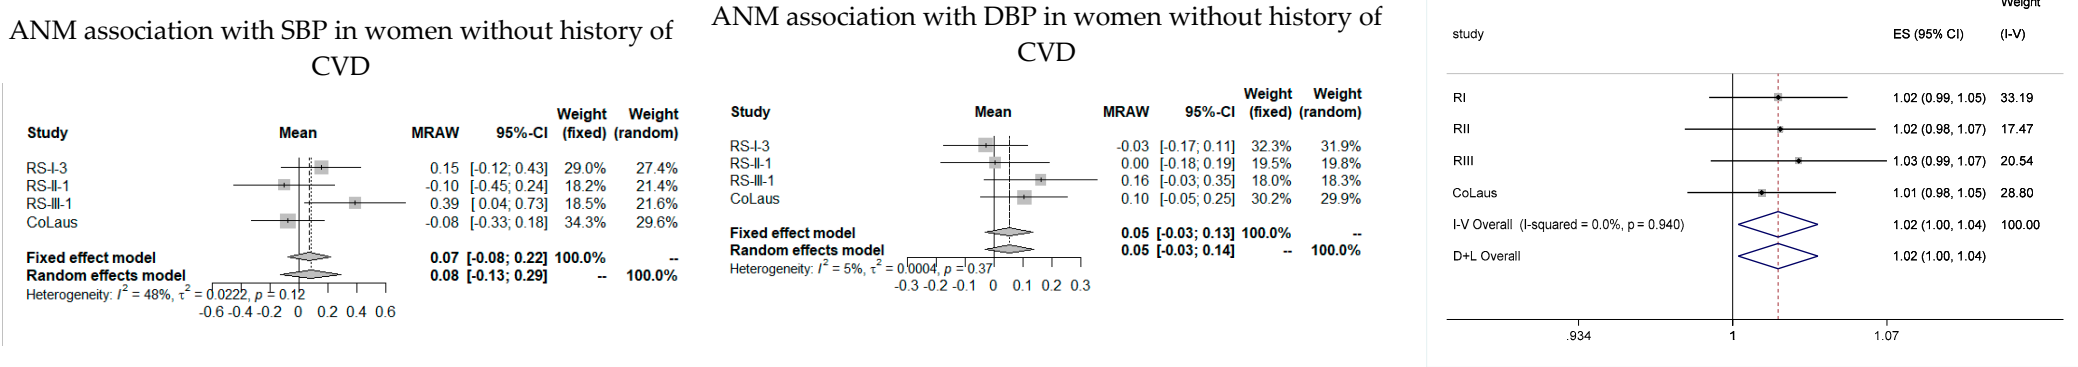

RS-I-3 n=1414; RS-II-1 n=746; RS-III-1 n=887; CoLaus n=1052. 350 observations deleted which include women who reported history of cardiovascular diseases and missing values. Regressions by study were not adjusted by history of cardiovascular diseases.

Figure S3d. Age of natural menopause association with Blood Pressure traits in Women with maximum 10 years after menopause

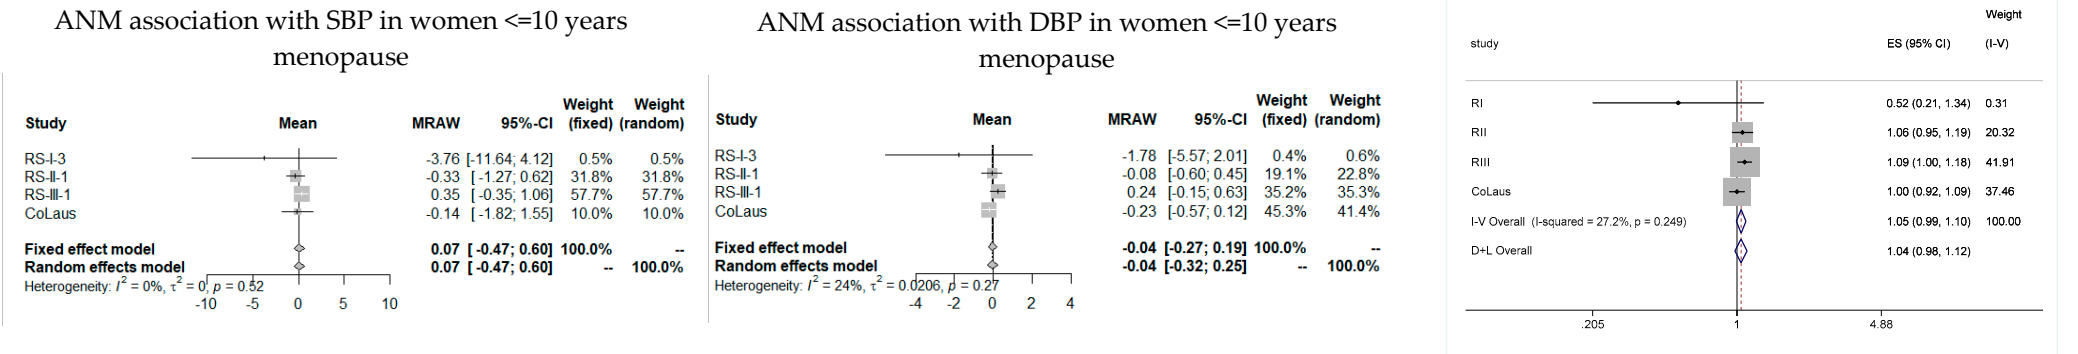

RS-I-3 n=51; RS-II-1 n=312; RS-III-1 n=611; CoLaus n=570. 2,905 observations deleted which include missing values and women who reported experiencing menopause more than 10 years ago  
Regressions by study were fully adjusted  
Use of antihypertensive medication was excluded from the HTA regressions

Figure S3e. Age of natural menopause association with Blood Pressure traits in Women without hypertension.

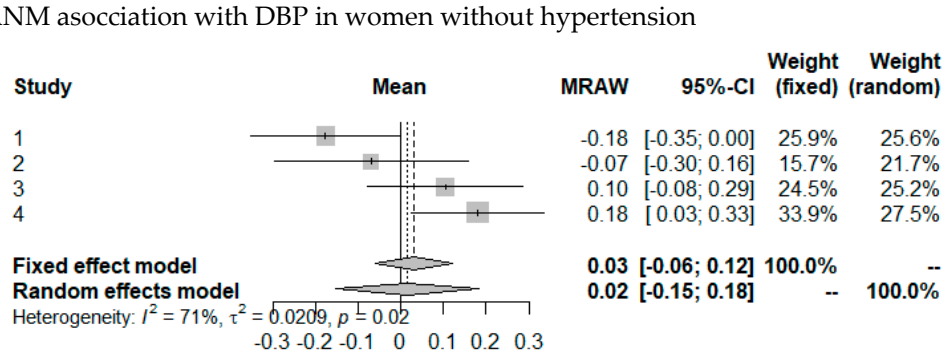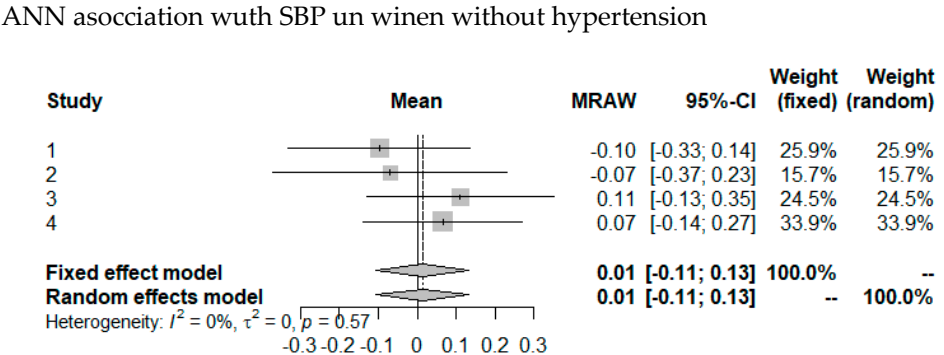

Study 1:RS-I-3 n=493; Study 2: RS-II-1 n=298; Study 3: RS-III-1 n=465; Study 4: CoLaus n=645. 2,548 women who had hypertension were deleted  
Regressions by study were fully adjusted  
Use of antihypertensive medication was excluded  
Pooled analysis regressions were adjusted by cohort

Figure S3f. Age of natural menopause association with hypertension defined antihypertensive medication

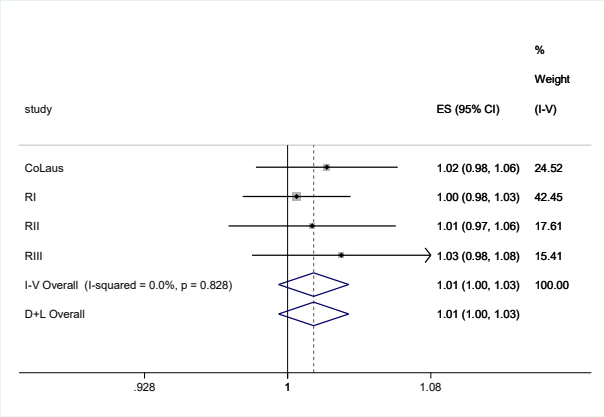

Prevalence of hypertension defined as antihypertensive medication CoLaus n=262(23.0); RS-I-3 n=614(38.3); RS-II-1 n=226(28.6); RS-III-1 n=223(24.2)

Figure S3g. Age of natural menopause association with hypertension defined antihypertensive medication in women with estimated glomerular filtration rate smaller than 60 ml/min/1.73m2

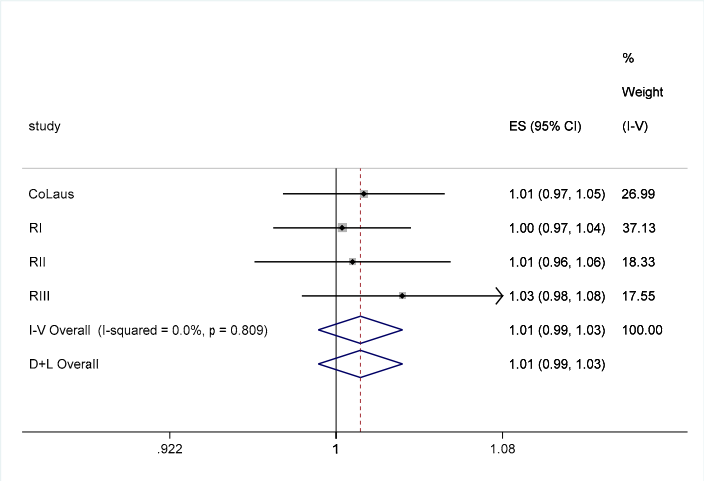

Study 1:RS-I-3 n= 1,237; Study 2: RS-II-1 n= 708; Study 3: RS-III-1 n= 878; Study 4: CoLaus n= 1,033; 593 observations deleted

Regressions by study were fully adjusted

FIGURE S4. ASSOCIATION OF GENETIC RISK SCORE OF ANM AFTER THE "LEAVE-ONE-OUT" ANALYSES.

|        |
|--------|
| CoLaus |
|--------|

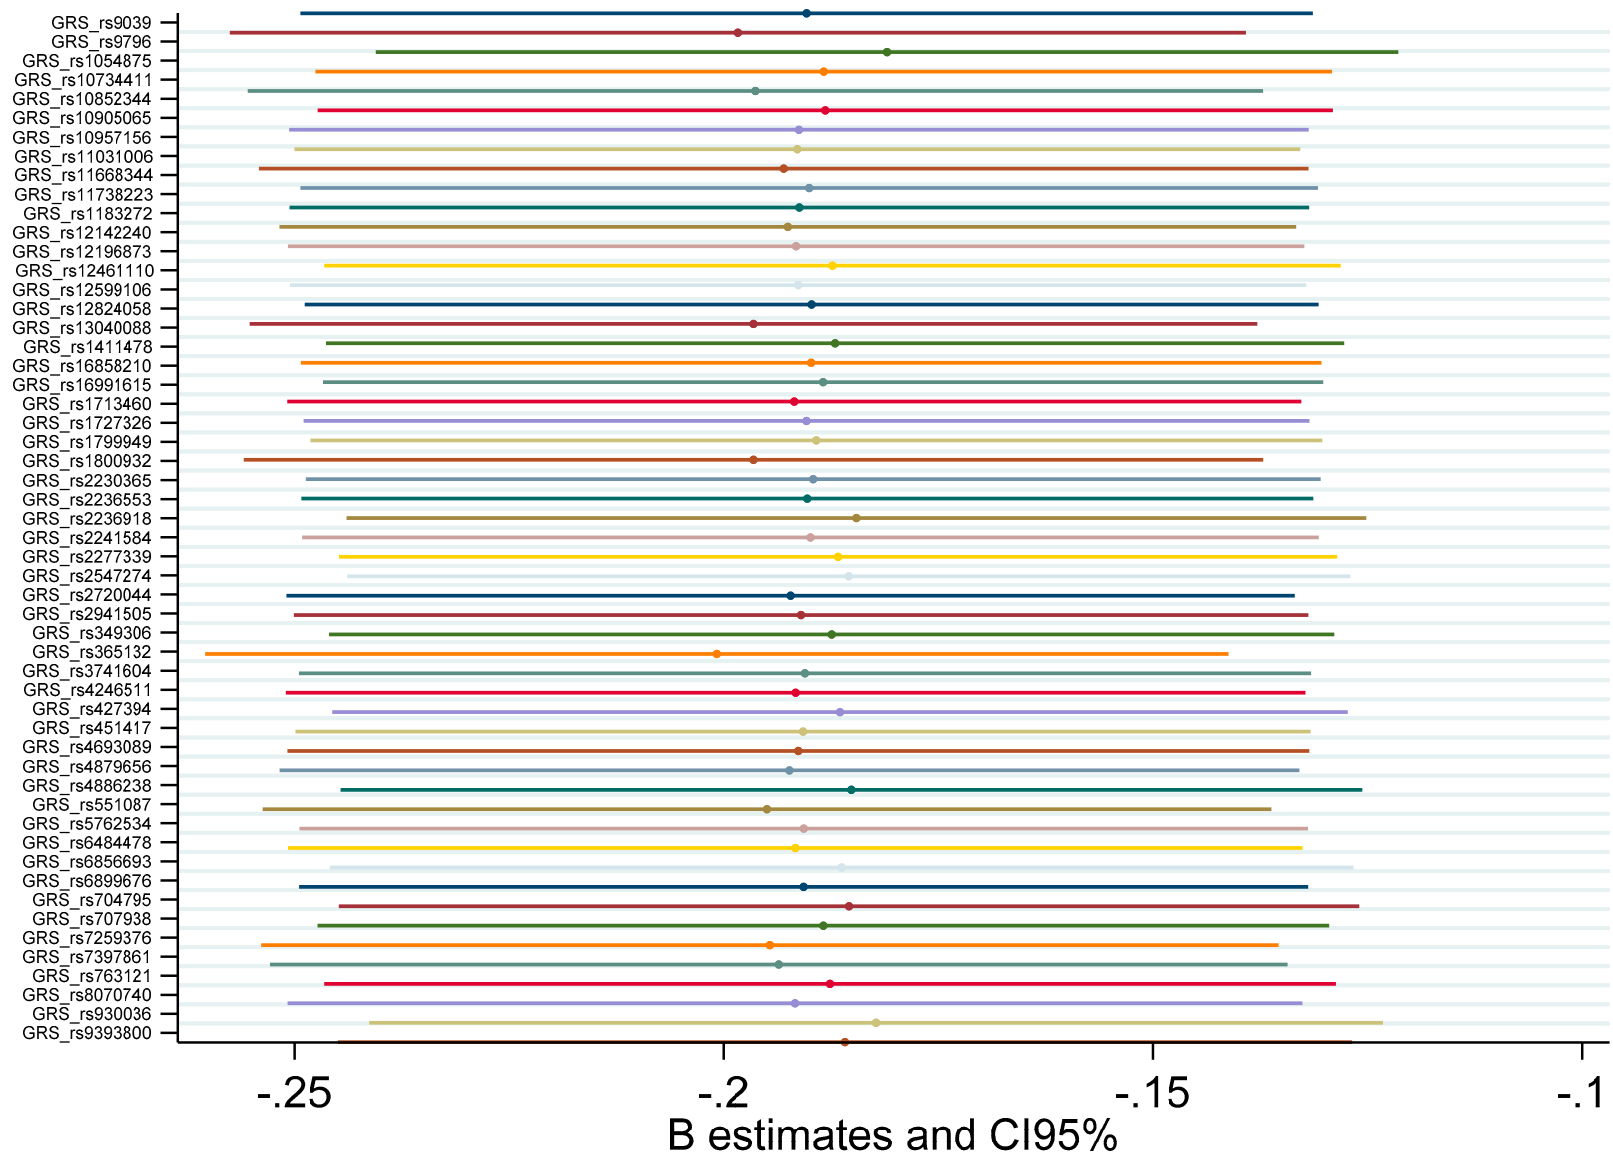

RS-I-3



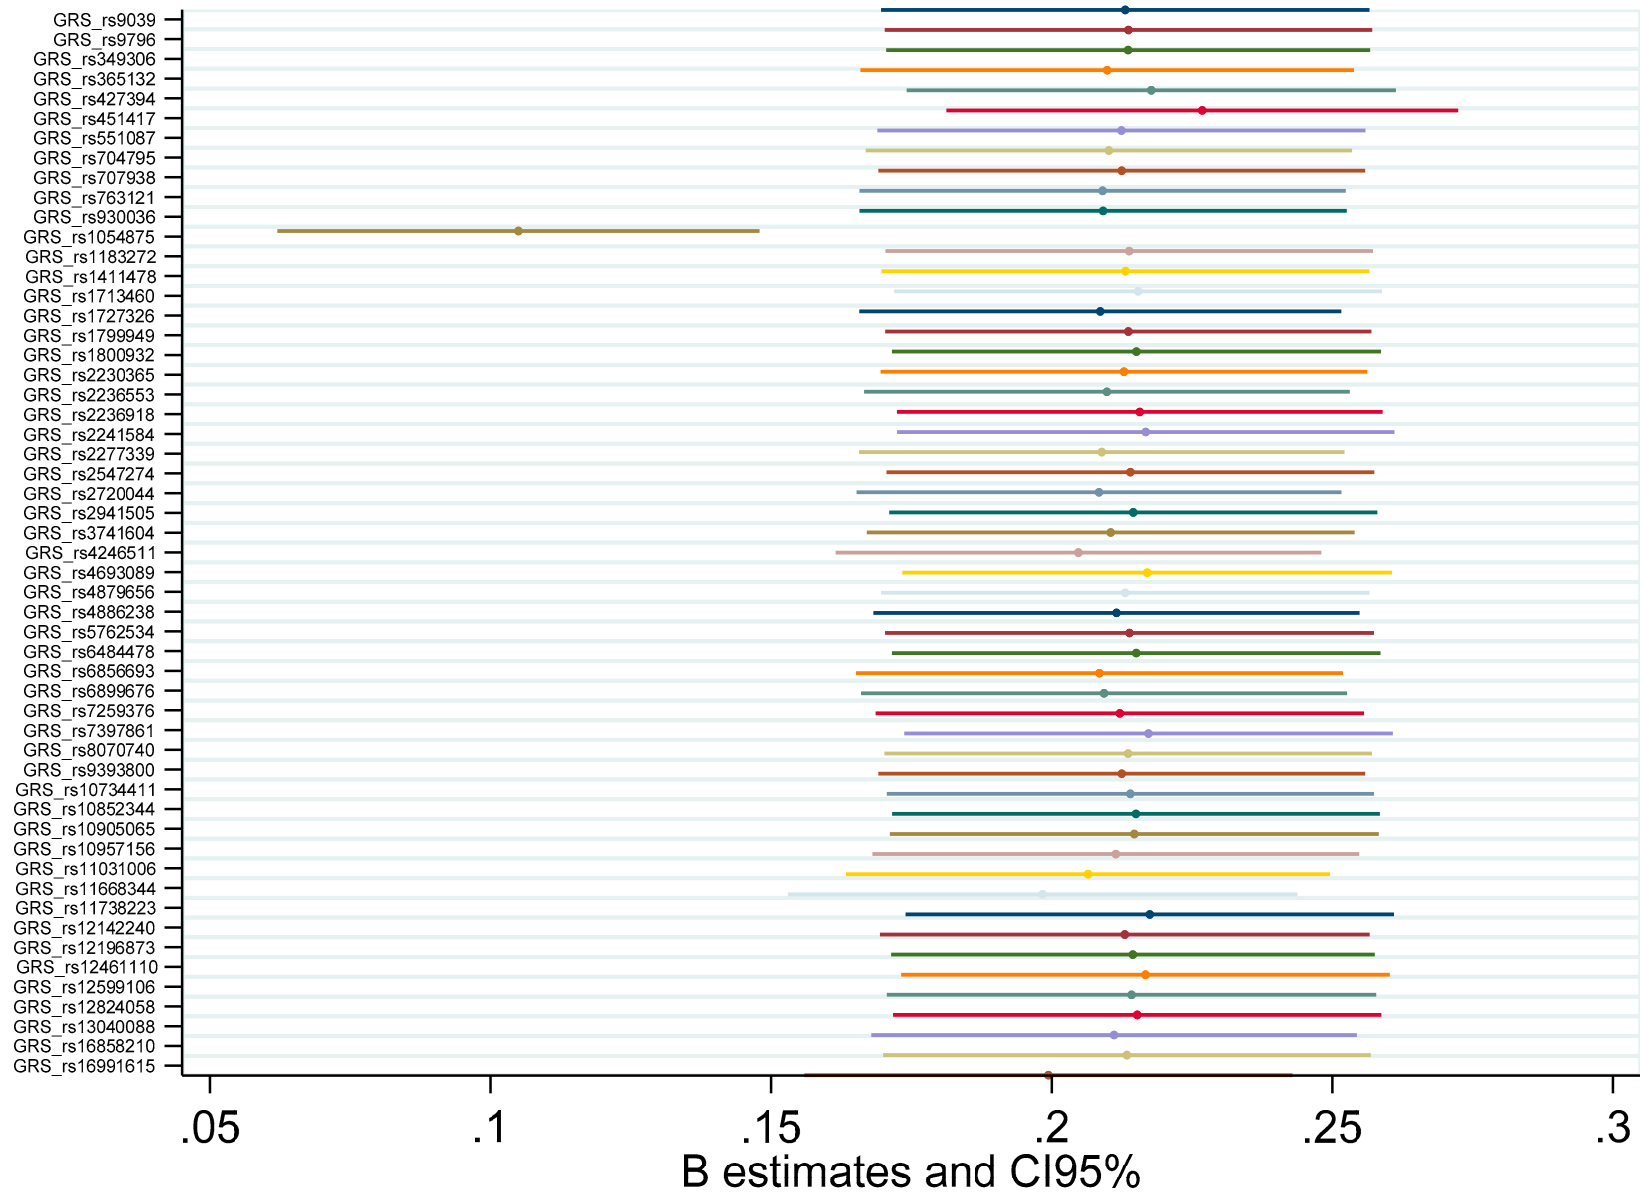

# RS-II-1

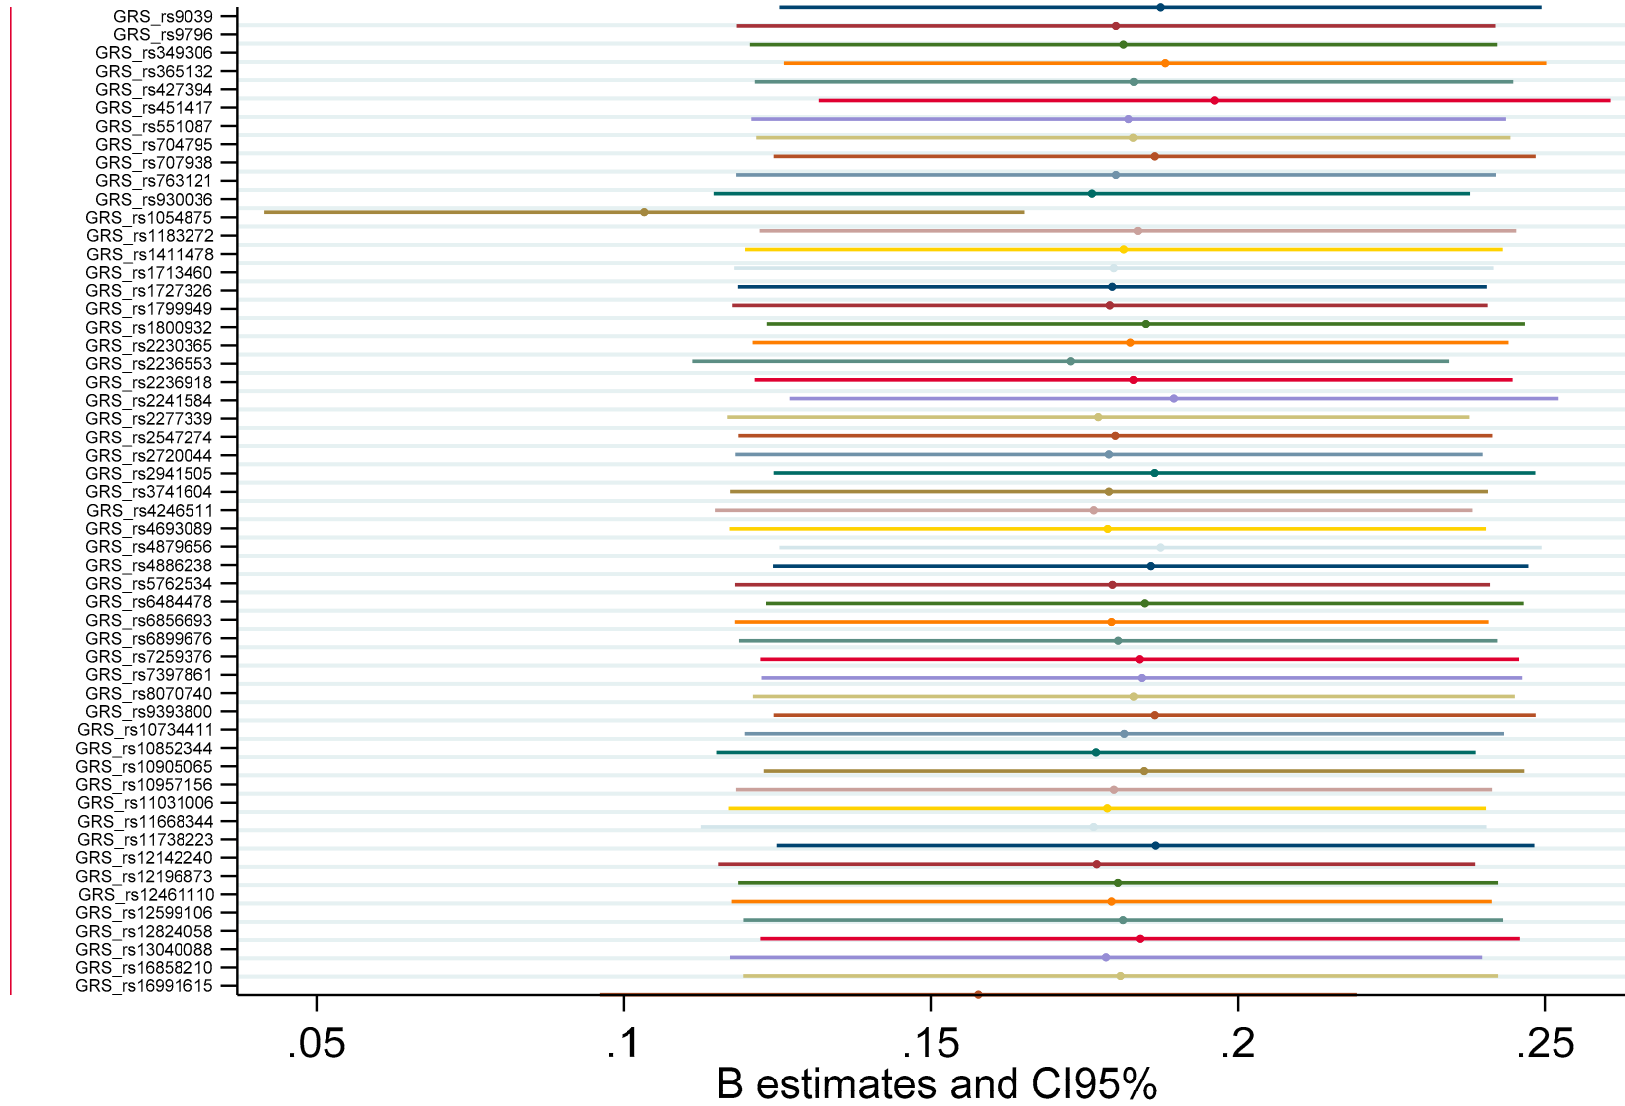

# RS-III-1

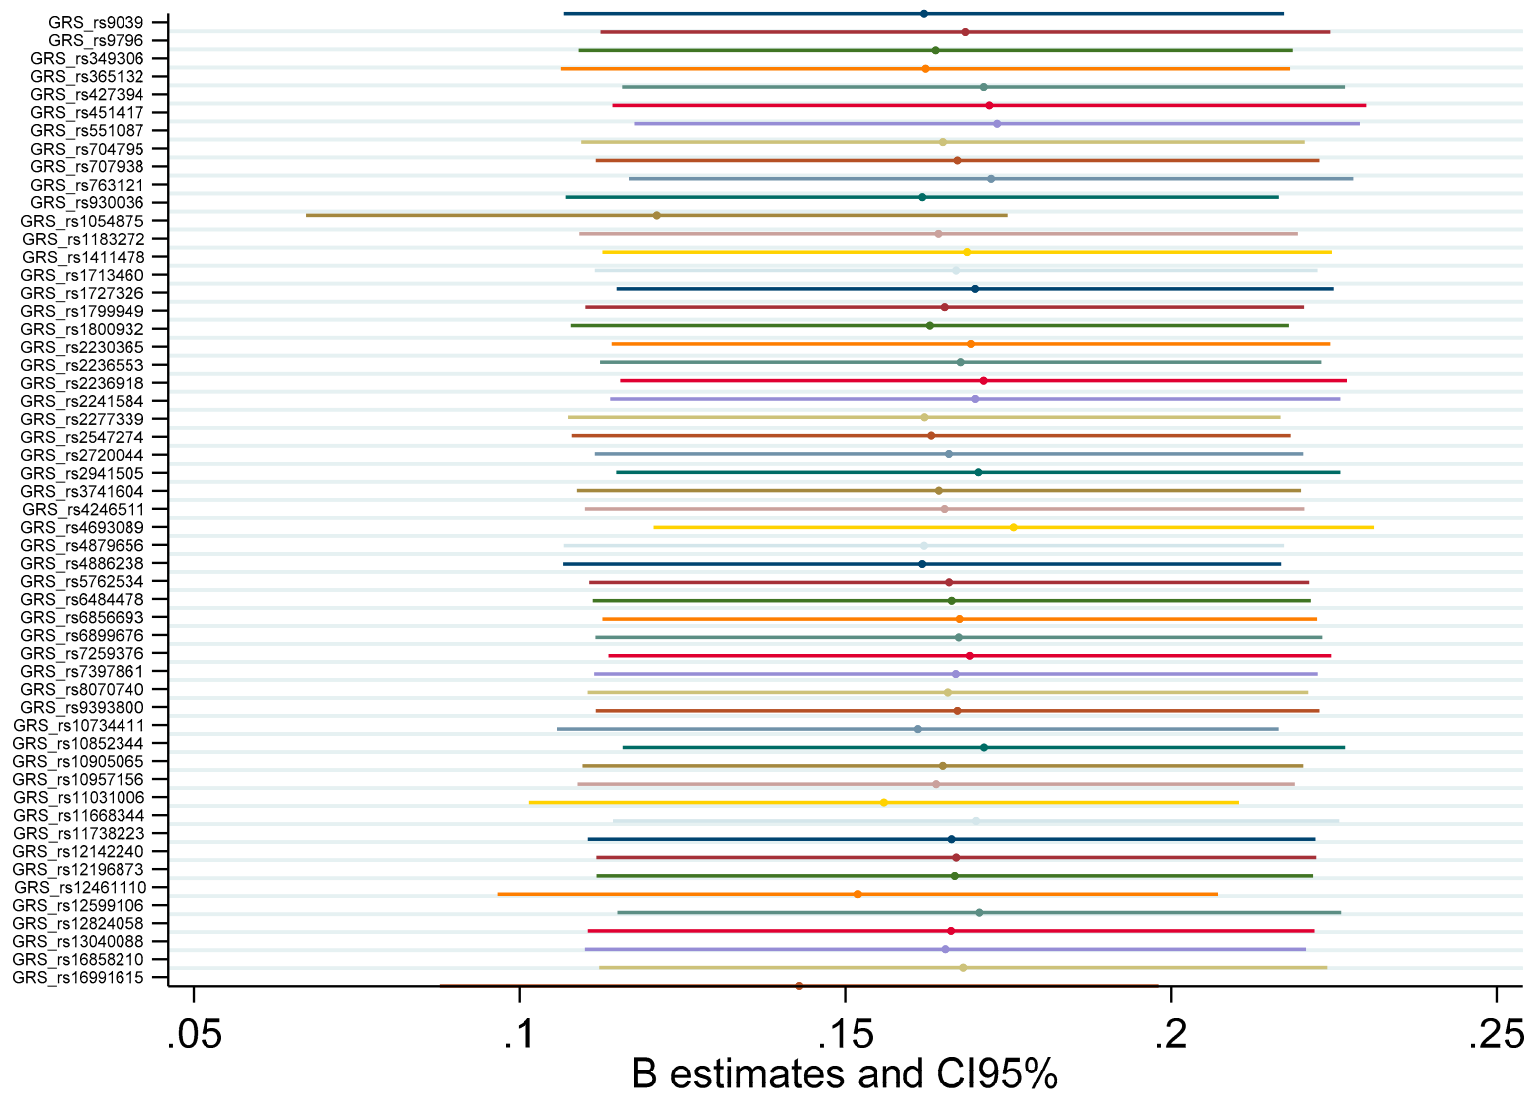

FIGURE S5. CAUSAL ESTIMATES DERIVED FROM INSTRUMENTAL VARIABLE ANALYSIS FOR A YEAR INCREASE IN ANM AND RISK OF BLOOD PRESSURE TRAITS USING INDIVIDUAL PARTICIPANT DATA AND EXCLUDING THE SNP rs1054875

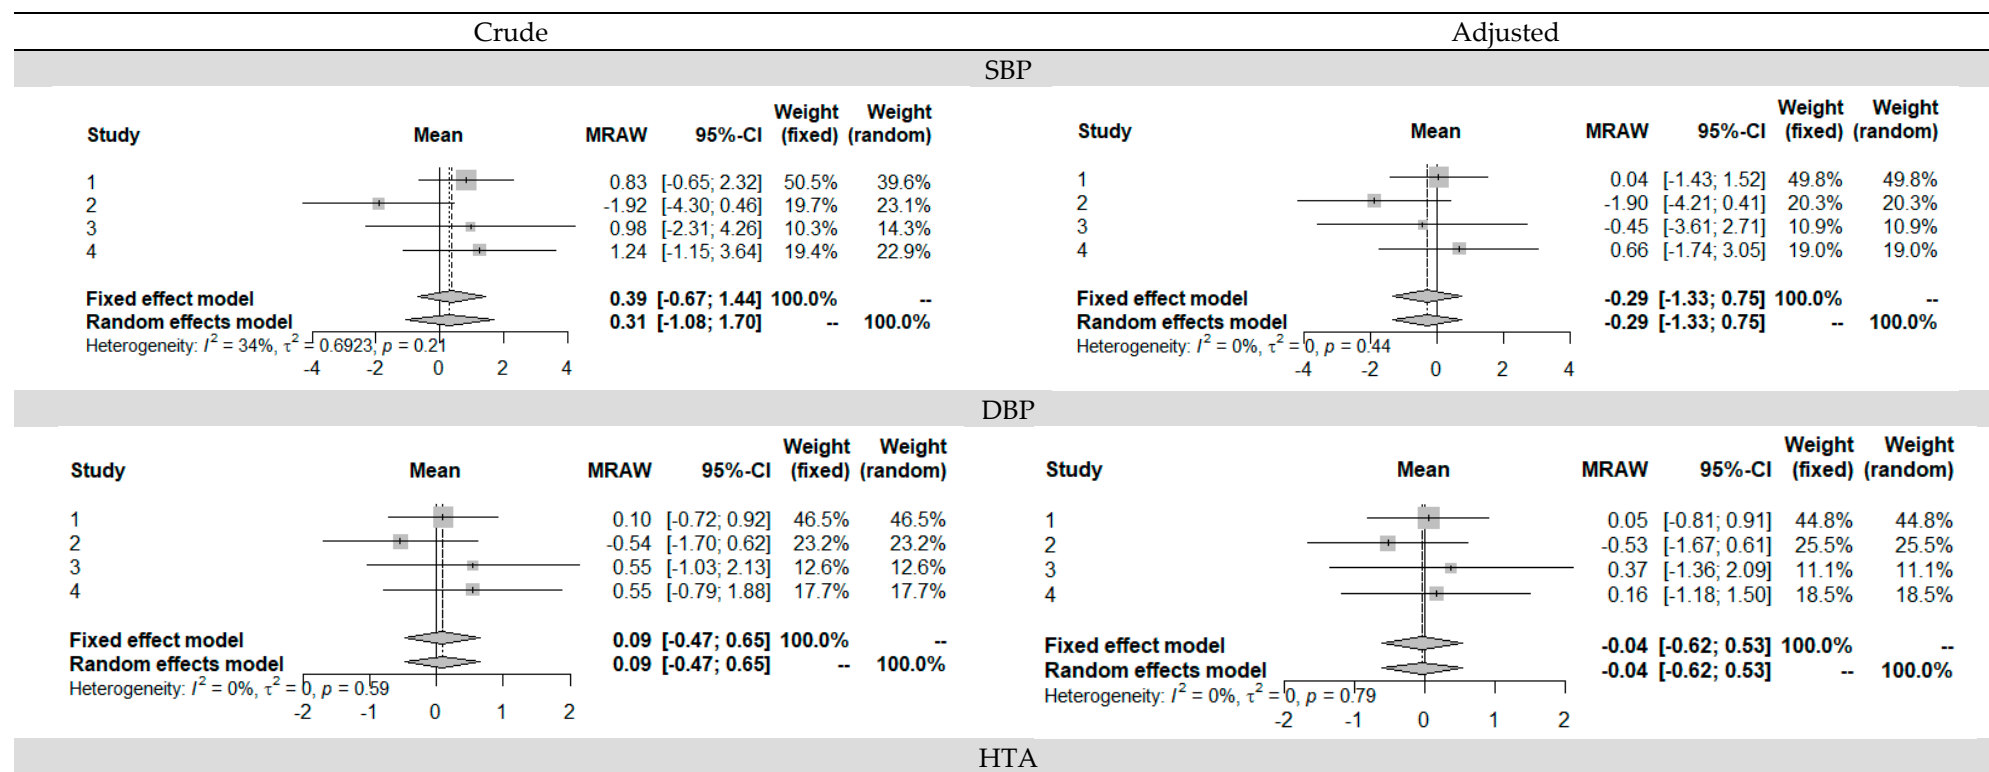

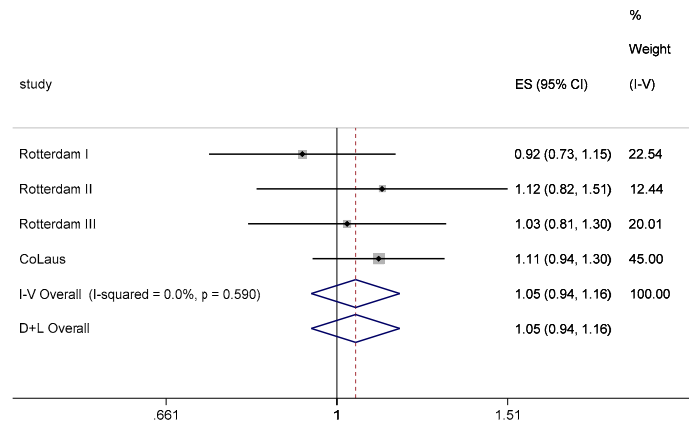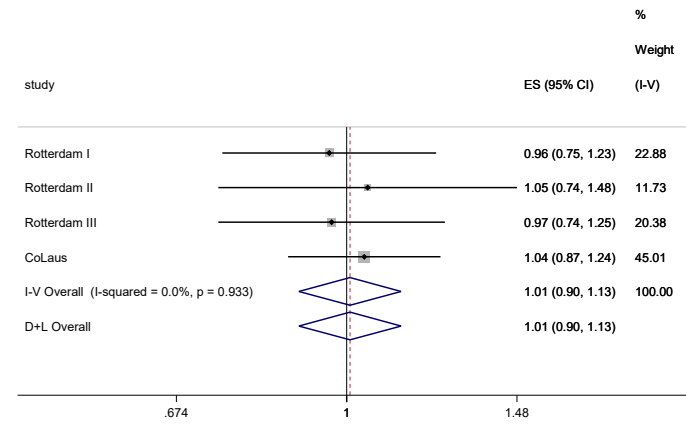

FIGURE S6. FUNNEL PLOT OF CAUSAL ASSOCIATION BETWEEN ANM AND BP.

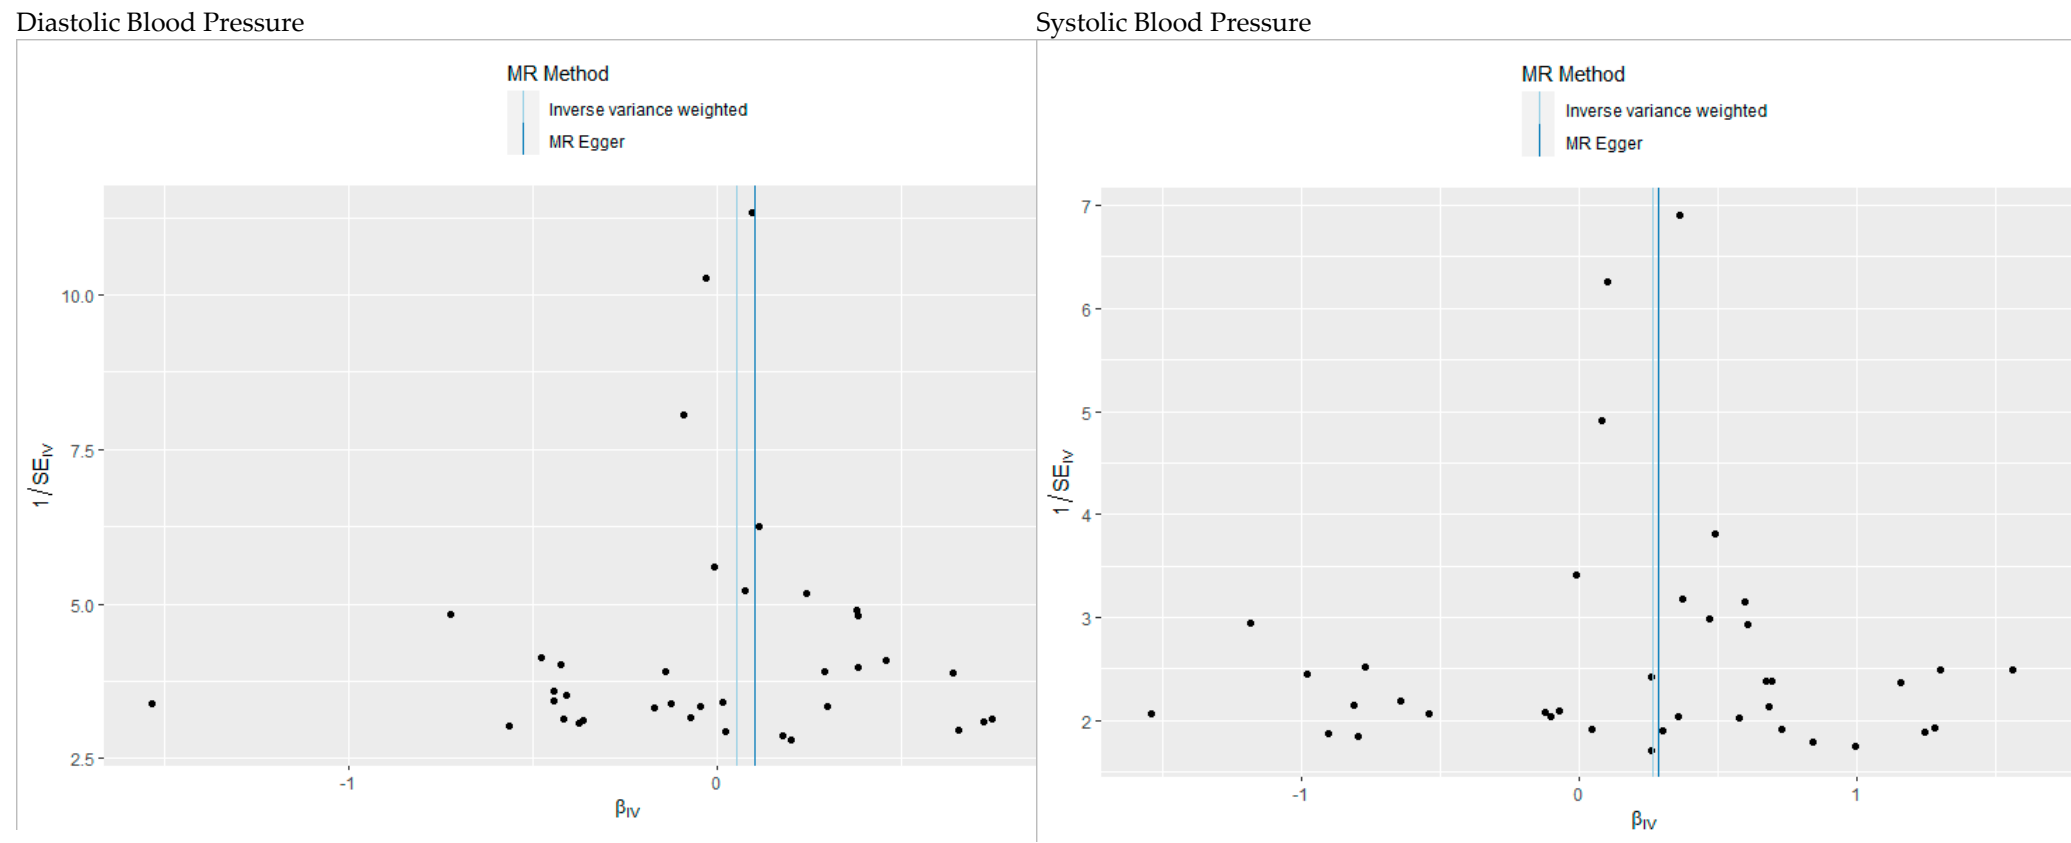

[illegible]

FIGURE S8. LEAVE-ONE-OUT PLOT TO ASSESS IF A SINGLE VARIANT IS DRIVING THE ASSOCIATION BETWEEN ANM AND BP

Inverse Weighted median

Figure S8a. Diastolic Blood Pressure

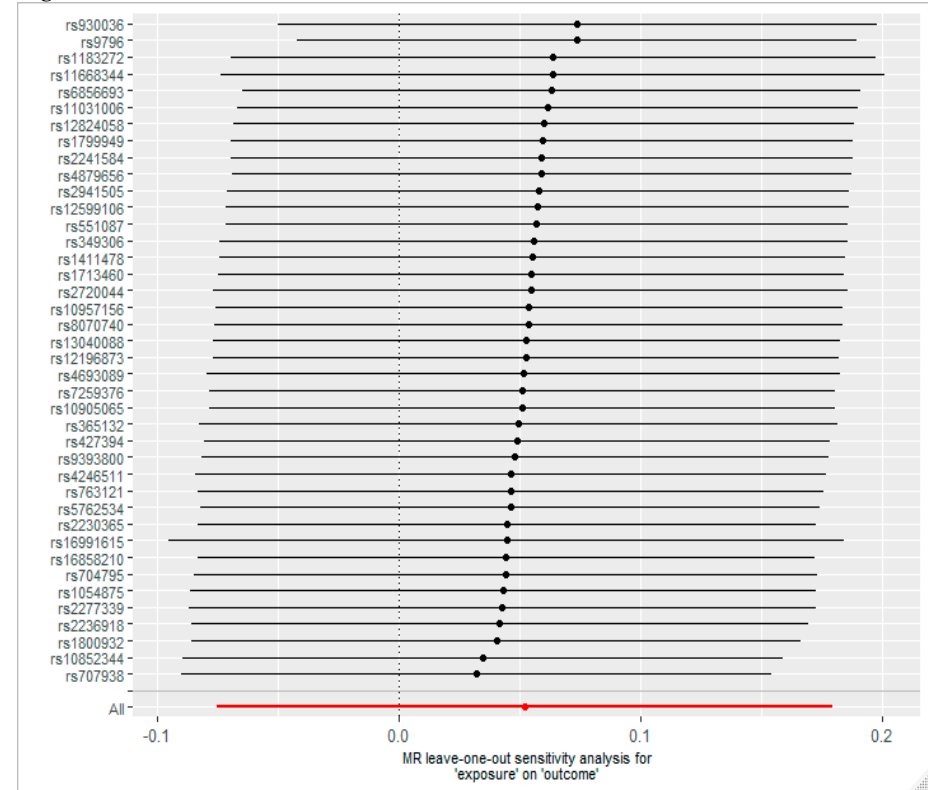

Figure S8b. Systolic Blood Pressure

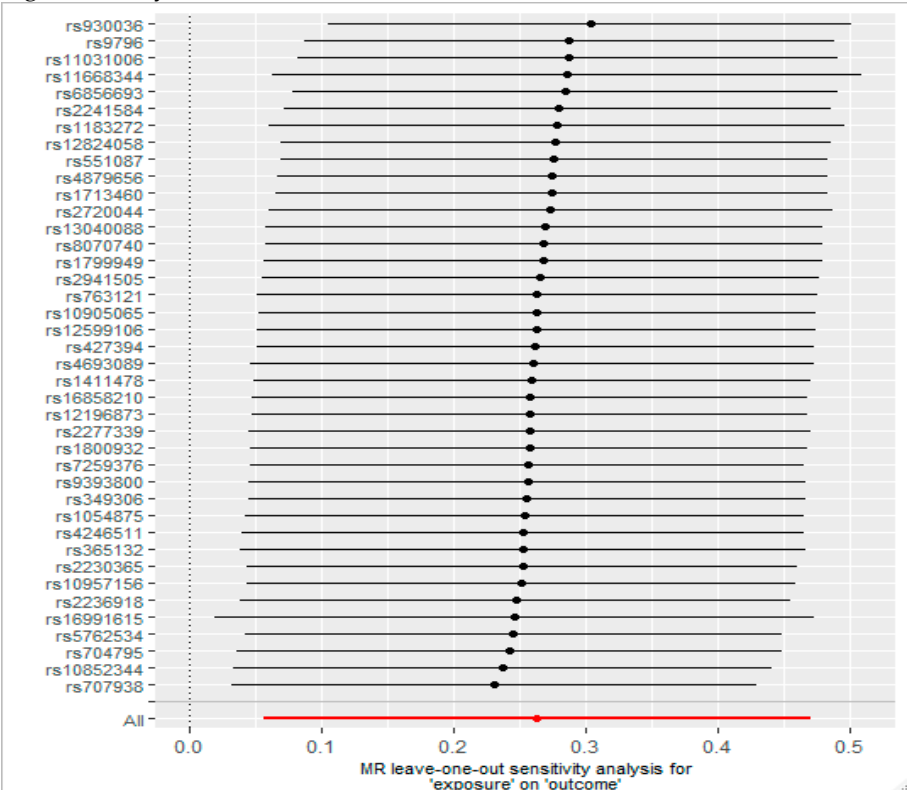



Figure S8c. Diastolic Blood Pressure

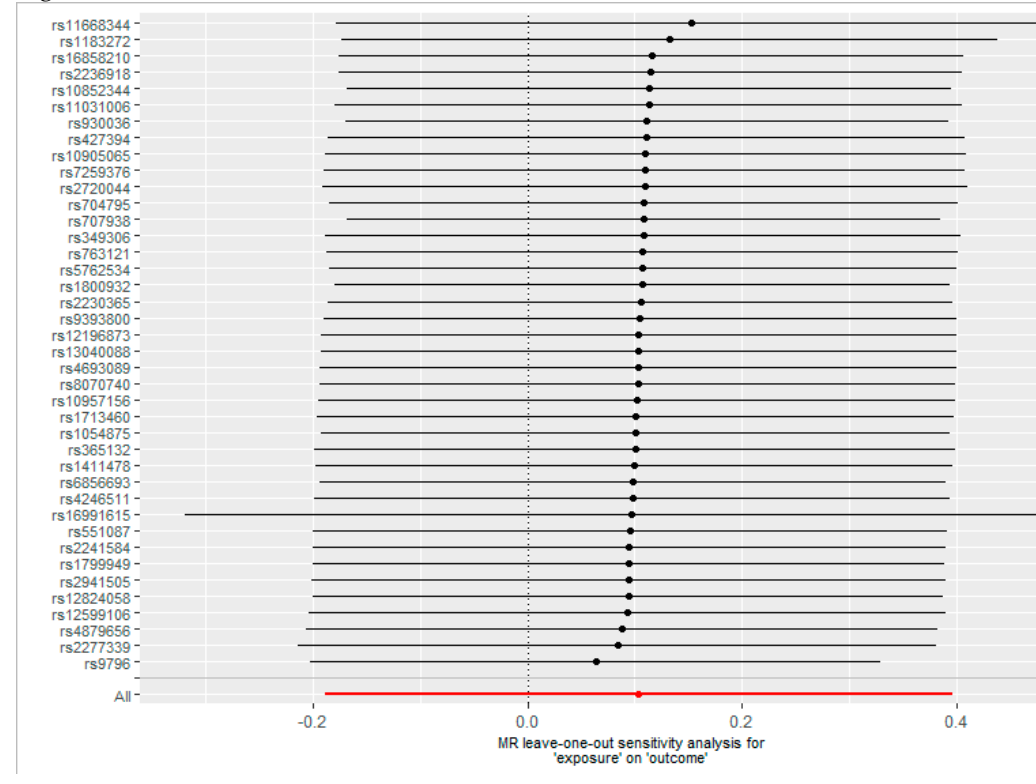

Figure S8d. Systolic Blood Pressure

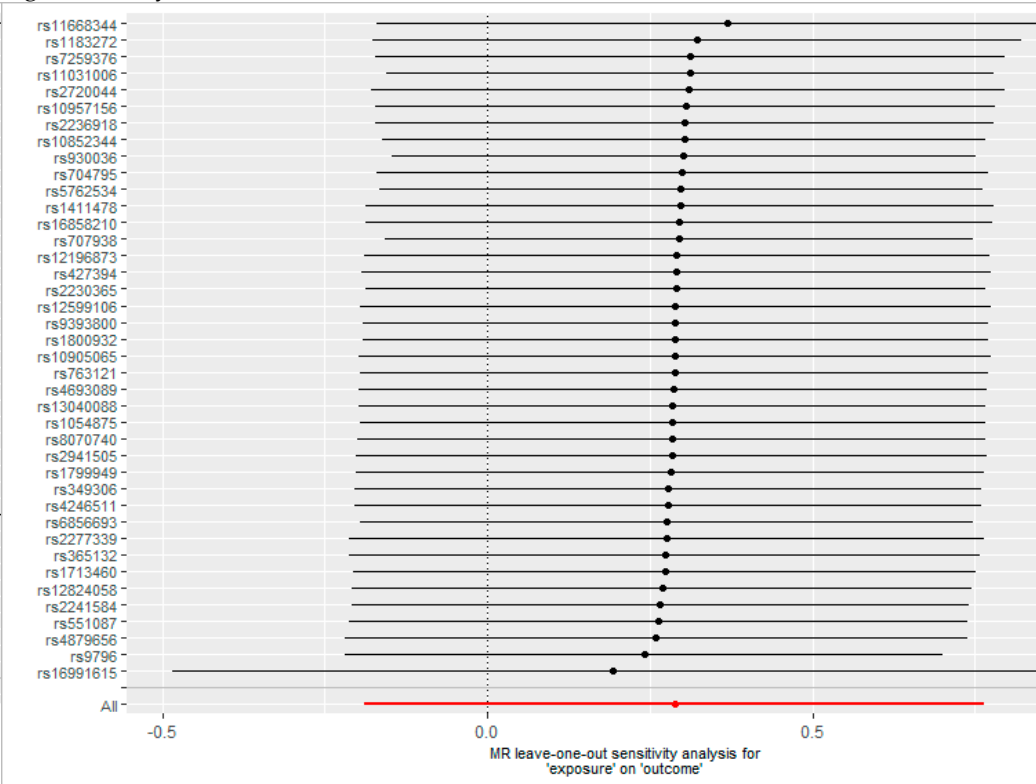

FIGURE S9. SCATTER PLOTS, LEAVE-ONE-OUT, FUNNEL PLOTS SNPs RELATED TO DDR GENES

a) Scatter plots SNPs related to DDR genes

Diastolic Blood Pressure

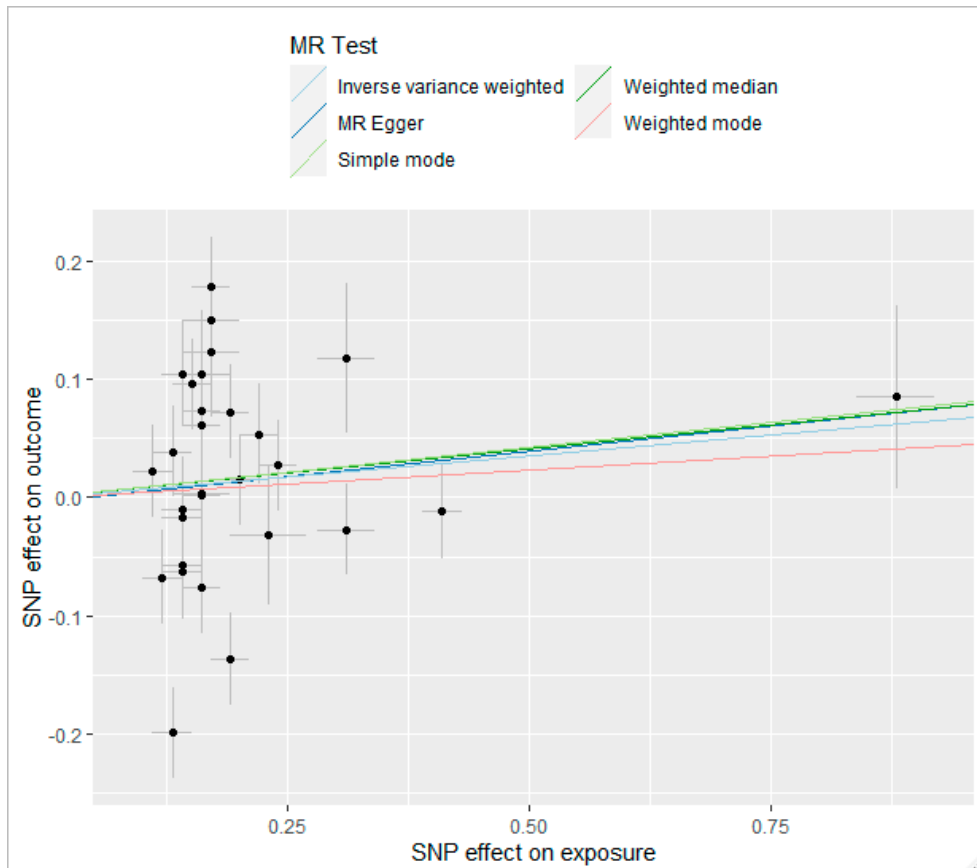

Systolic Blood Pressure

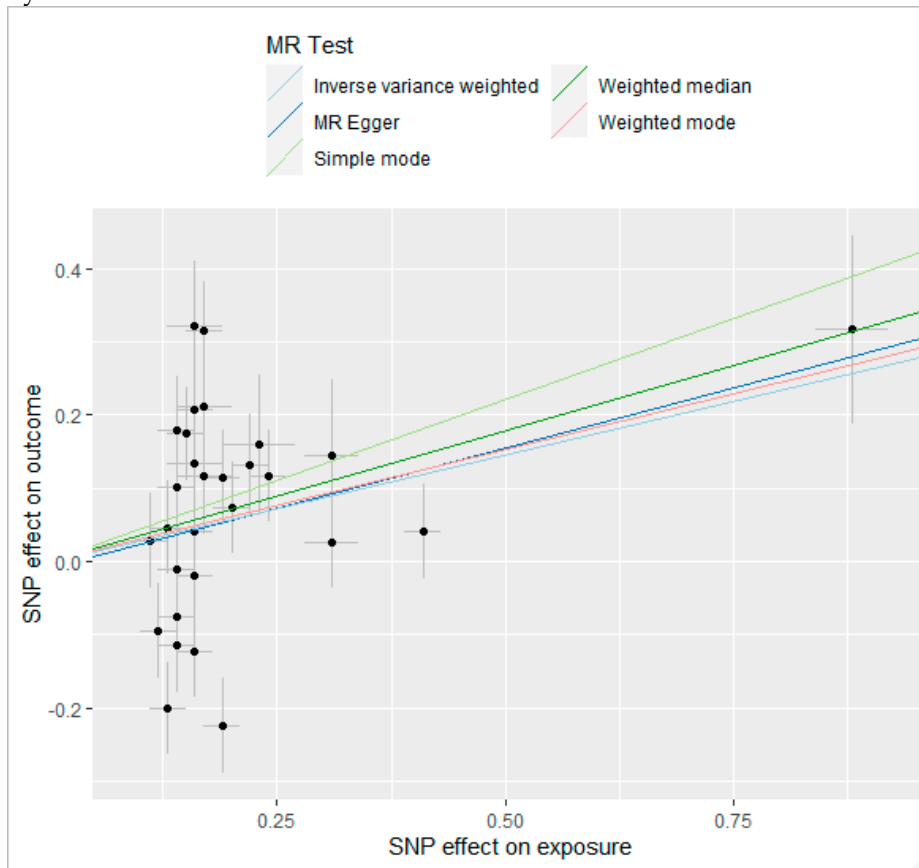

b) Leave-one-out analyses exposure and outcome SNPs related to DDR genes

Diastolic Blood Pressure 29 DDR genes

Weighted median

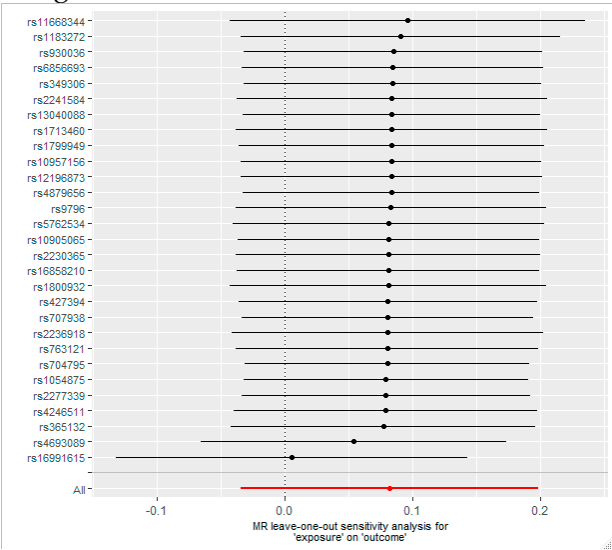

Inverse variance weighted

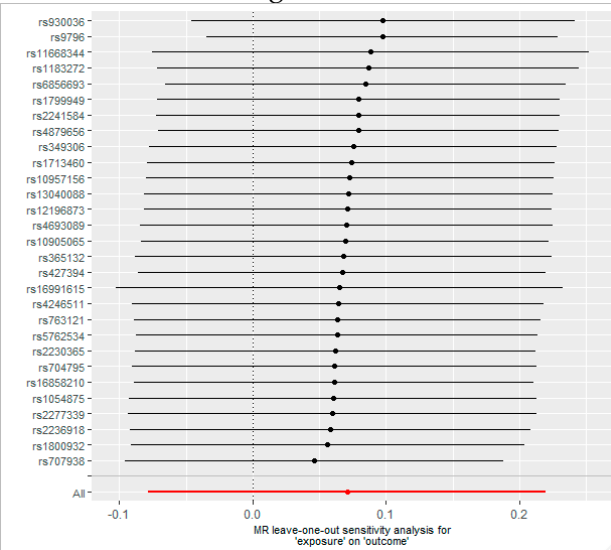

MR-Egger

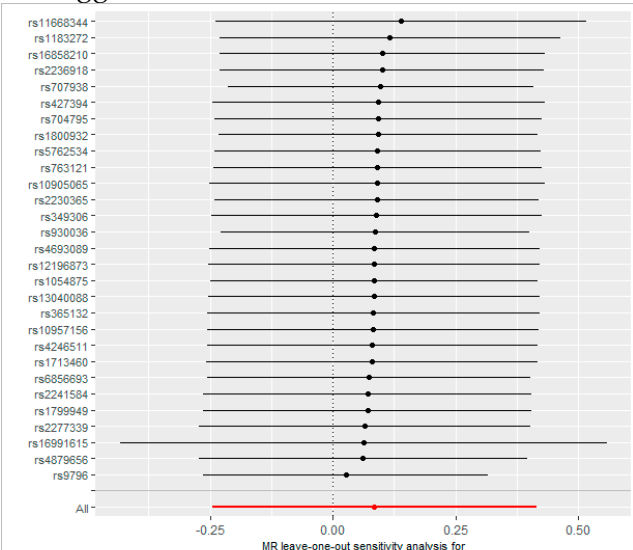

Systolic Blood Pressure 29 DDR genes

Weighted median

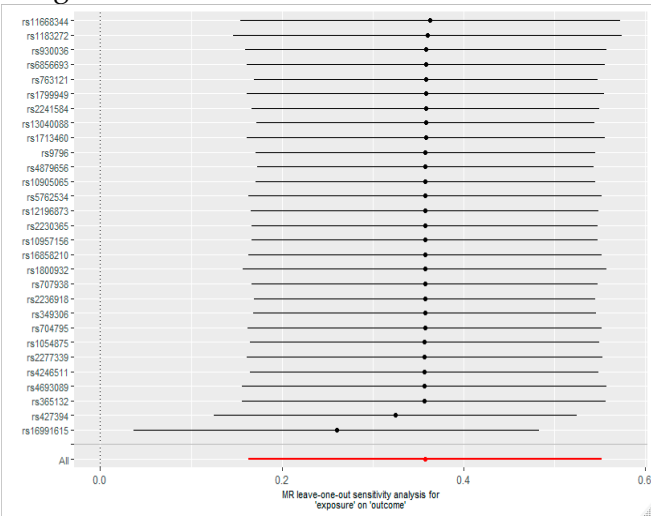

Inverse variance weighted

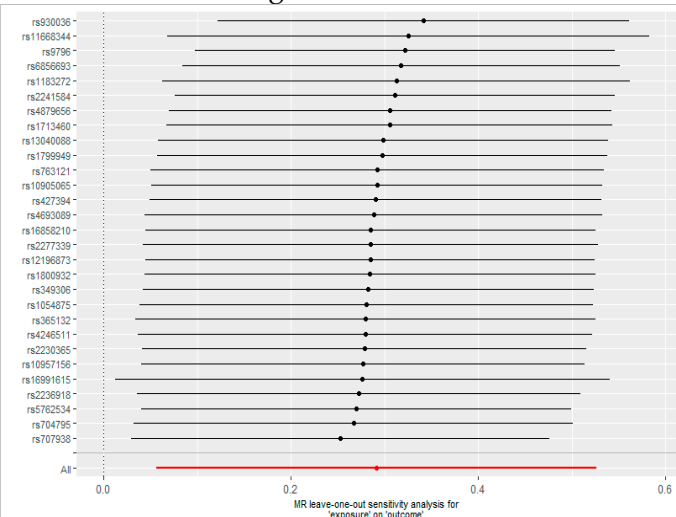

MR-Egger

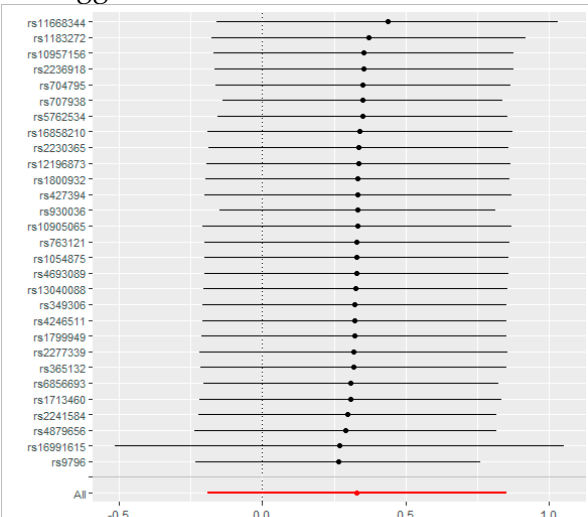

c) Funnel plot SNPs related to DDR genes

Diastolic Blood Pressure

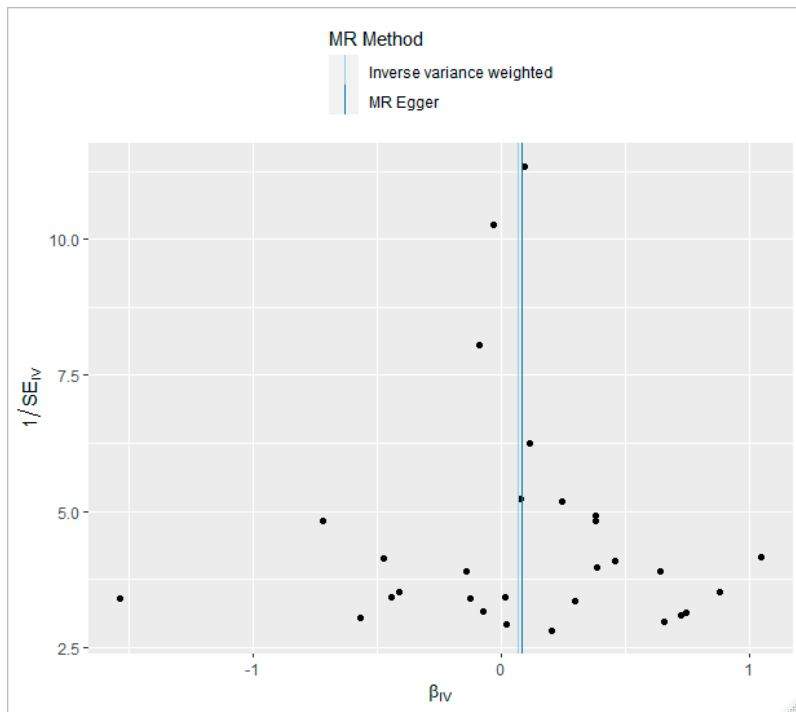

Systolic Blood Pressure

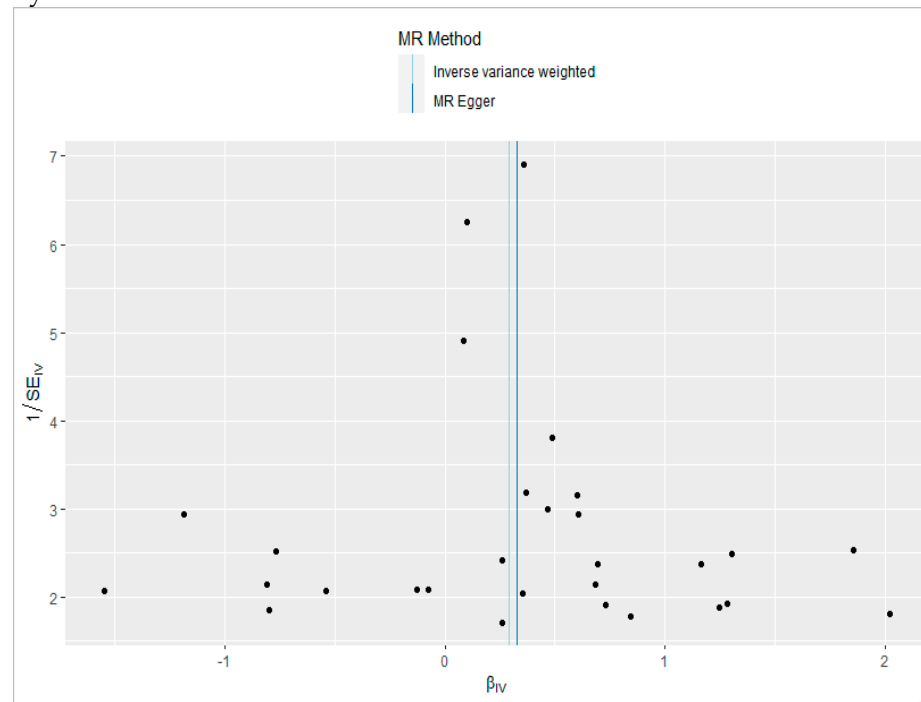

FIGURE S10. SCATTER PLOTS, LEAVE-ONE-OUT, FUNNEL PLOTS SNPs NON-RELATED TO DDR GENES

a) Scatter plots SNPs non-related to DDR genes

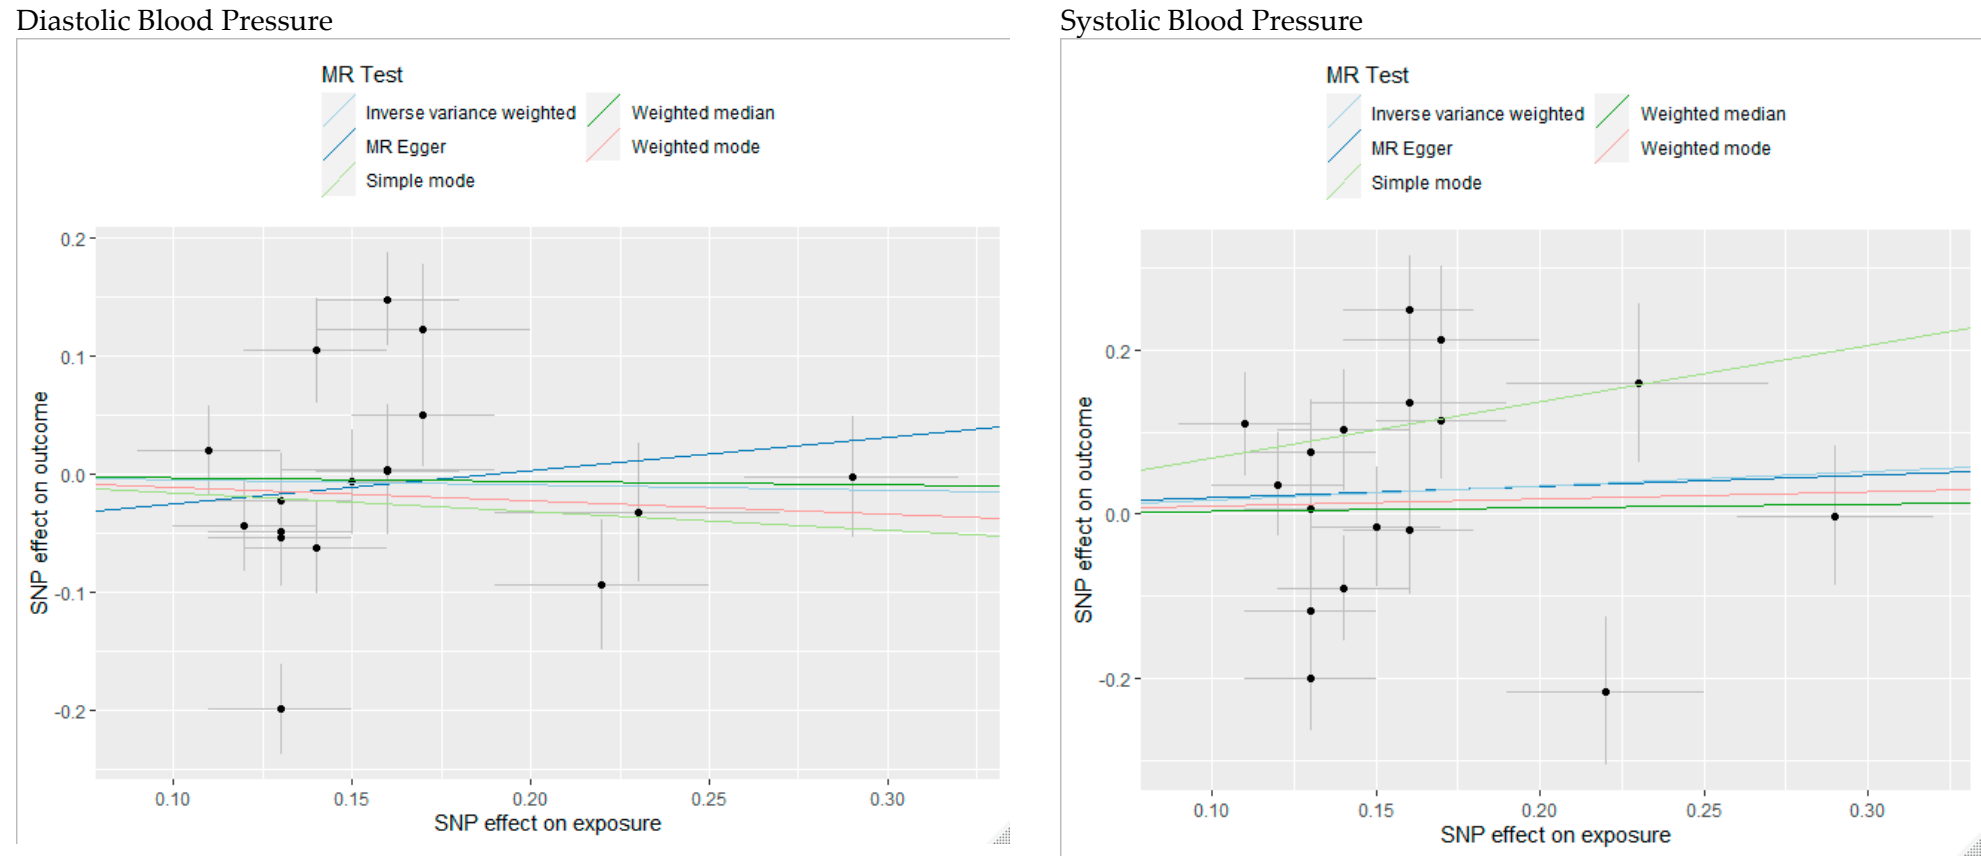

b) Leave-one-out analyses exposure and outcome SNPs non-related to DDR genes

Diastolic Blood Pressure 17 NON-DDR genes

Weighted median

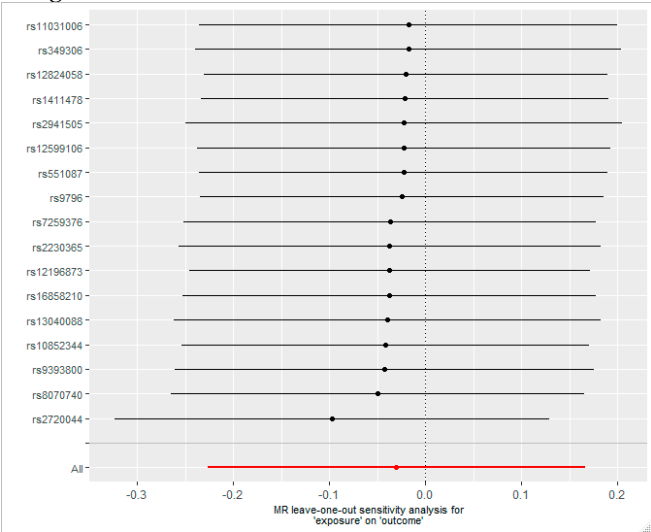

Inverse variance weighted

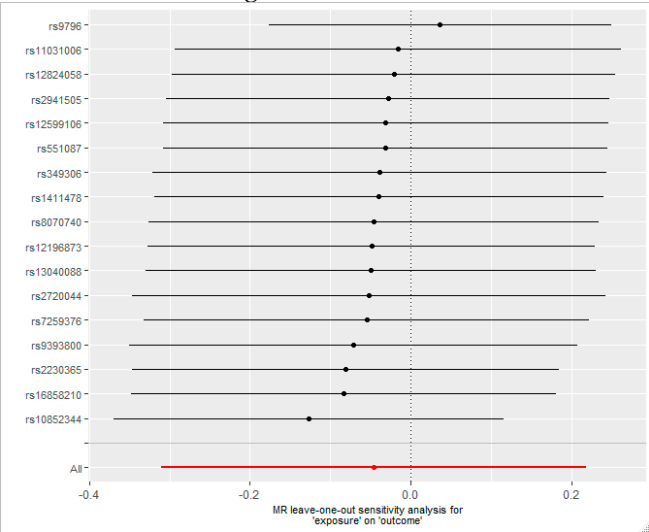

MR-Egger

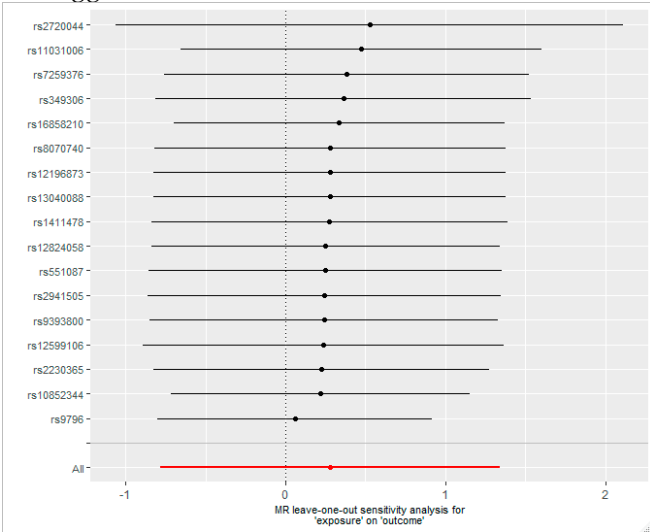

Systolic Blood Pressure 17 NON-DDR genes

Weighted median

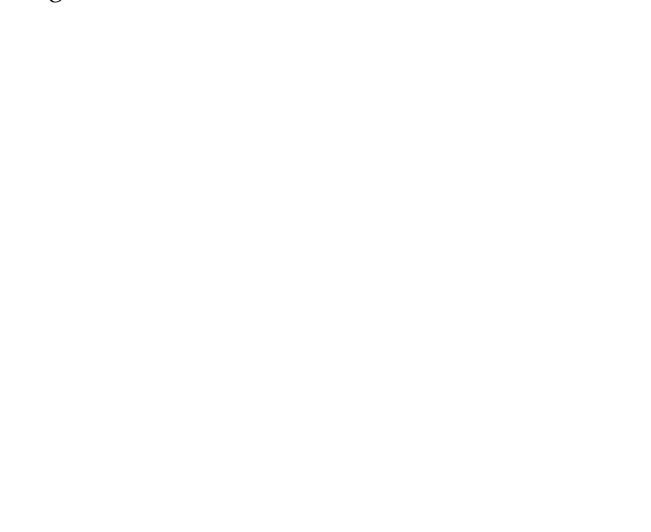

Inverse variance weighted

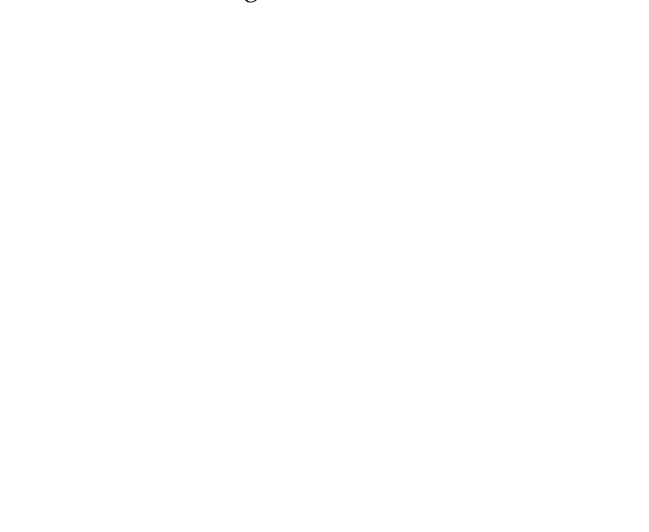

MR-Egger

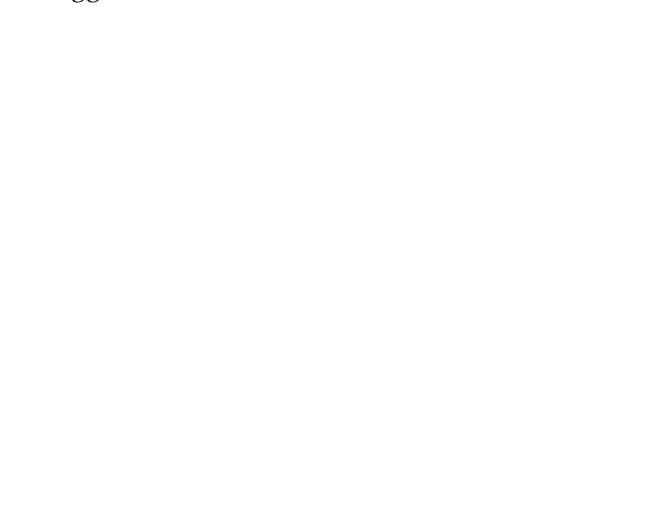

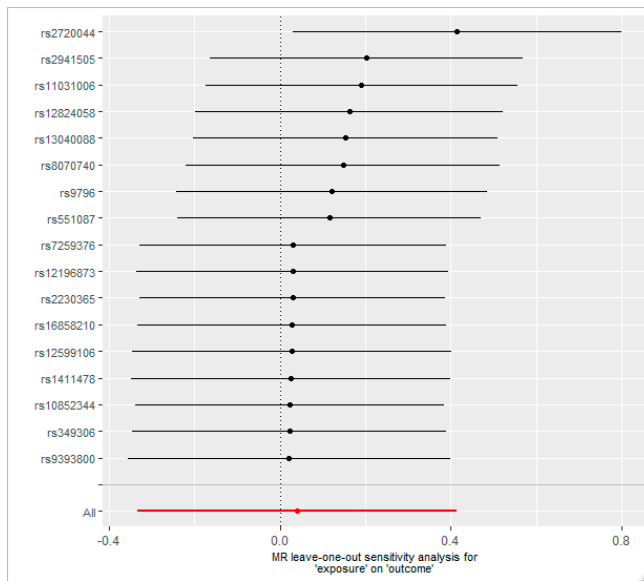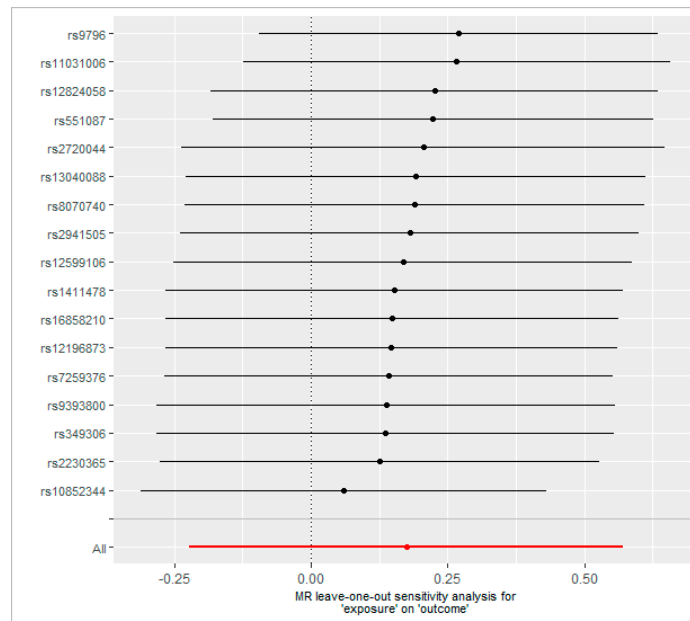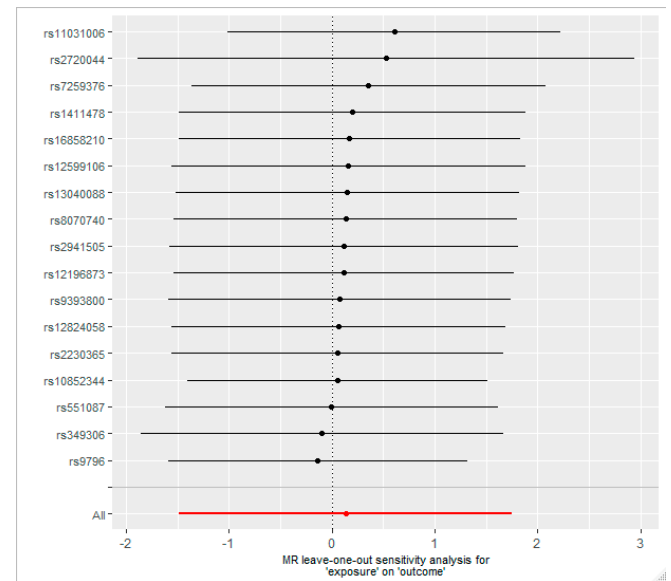

C) Funnel plot SNPs non-related to DDR genes  
Diastolic Blood Pressure

Systolic Blood Pressure

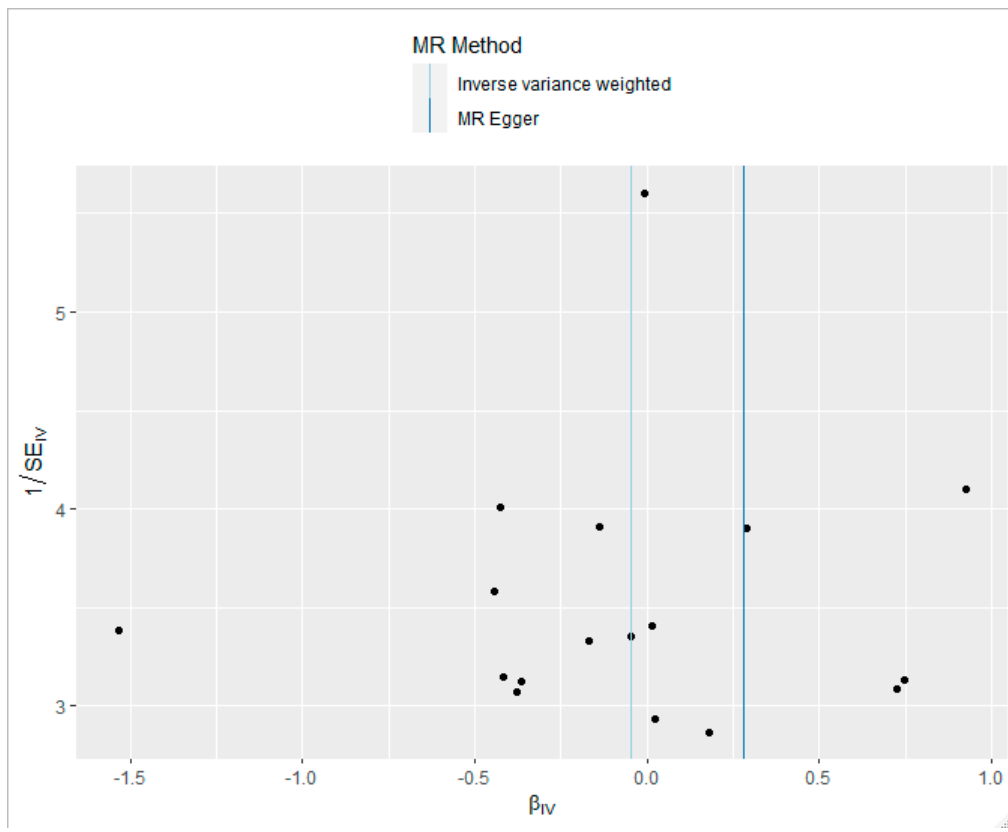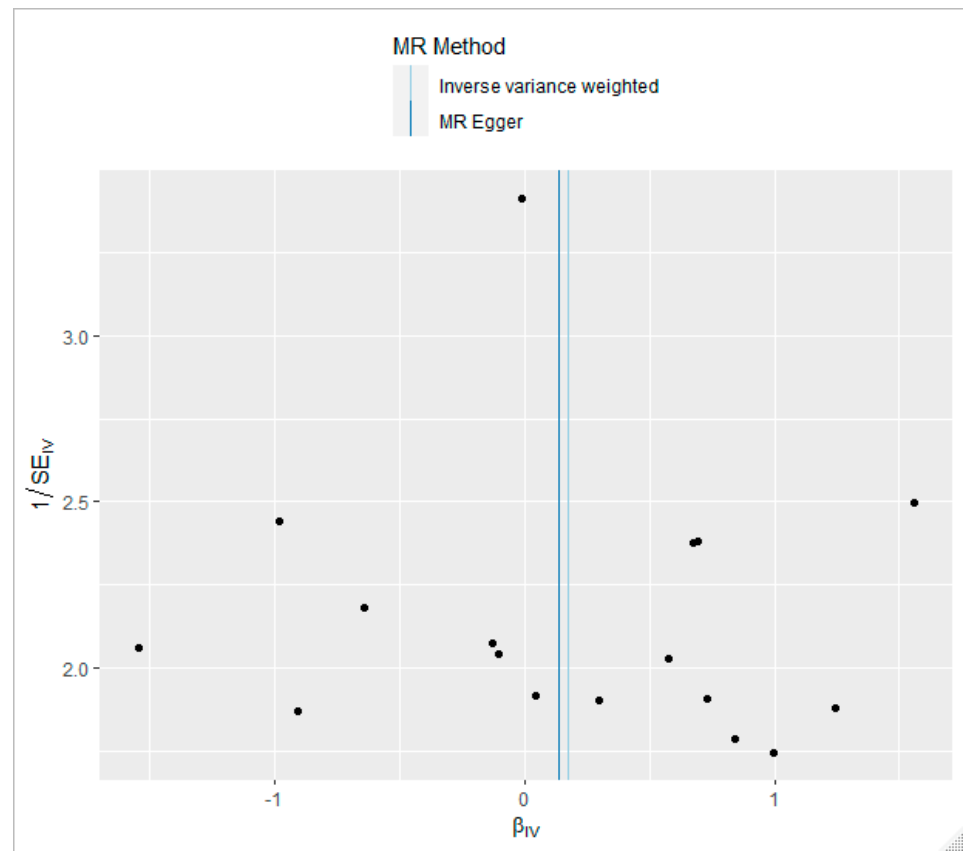



## References

1. Firmann M, Mayor V, Vidal PM, Bochud M, Pecoud A, Hayoz D, et al. The CoLaus study: a population-based study to investigate the epidemiology and genetic determinants of cardiovascular risk factors and metabolic syndrome. *BMC Cardiovasc Disord.* 2008;8:6.
2. Ikram MA, Brusselle G, Ghanbari M, Goedegebure A, Ikram MK, Kavousi M, et al. Objectives, design and main findings until 2020 from the Rotterdam Study. *European Journal of Epidemiology.* 2020:1-35.
3. van Leeuwen R, Ikram MK, Vingerling JR, Witteman JCM, Hofman A, de Jong PTVM. Blood pressure, atherosclerosis, and the incidence of age-related maculopathy: The Rotterdam Study. *Invest Ophth Vis Sci.* 2003;44(9):3771-7.
4. Delaneau O, Marchini J, Zagury J-F. A linear complexity phasing method for thousands of genomes. *Nature methods.* 2012;9(2):179-81.
5. Das S, Forer L, Schön herr S, Sidore C, Locke AE, Kwong A, et al. Next-generation genotype imputation service and methods. *Nature genetics.* 2016;48(10):1284-7.
6. McCarthy S, Das S, Kretzschmar W, Delaneau O, Wood AR, Teumer A, et al. A reference panel of 64,976 haplotypes for genotype imputation. *Nature genetics.* 2016;48(10):1279-83.
7. Day FR, Ruth KS, Thompson DJ, Lunetta KL, Pervjakova N, Chasman DI, et al. Large-scale genomic analyses link reproductive aging to hypothalamic signaling, breast cancer susceptibility and BRCA1-mediated DNA repair. *Nat Genet.* 2015;47(11):1294-303.
8. Sedaghat S, Pazoki R, Uitterlinden AG, Hofman A, Stricker BHC, Ikram MA, et al. Association of uric acid genetic risk score with blood pressure: the Rotterdam study. *Hypertension.* 2014;64(5):1061-6.
9. Kim JH. Multicollinearity and misleading statistical results. *Korean journal of anesthesiology.* 2019;72(6):558.
10. Davey Smith G, Hemani G. Mendelian randomization: genetic anchors for causal inference in epidemiological studies. *Hum Mol Genet.* 2014;23(R1):R89-98.
11. Burgess S, Smith GD, Davies NM, Dudbridge F, Gill D, Glymour MM, et al. Guidelines for performing Mendelian randomization investigations. *Wellcome Open Research.* 2019;4.
